# Supplementary material for: A copper nitride nanocube catalyst for highly efficient hydroboration of alkynes
Source: Royal Society of Chemistry journal article supplement (doi:10.1039/d2ob02130g), 2022-12-20

# Copper nitride nanocube catalyst for the highly efficient hydroboration of alkynes

## Table of contents

|                                                                                                                                                               |         |
|---------------------------------------------------------------------------------------------------------------------------------------------------------------|---------|
| 1. Characterization of Cu <sub>3</sub> N NCs                                                                                                                  | S2      |
| 2. Optimization of reaction conditions                                                                                                                        | S2      |
| 3. Comparison of Cu <sub>3</sub> N NCs catalytic system and reported Cu catalytic systems for hydroboration of <b>1a</b> with B <sub>2</sub> Pin <sub>2</sub> | S3      |
| 4. Preparation and characterization of Cu <sub>2</sub> O NCs                                                                                                  | S4      |
| 5. Reuse experiments                                                                                                                                          | S5      |
| 6. Limitation of substrate scope                                                                                                                              | S6      |
| 7. Lewis acid-base property of Cu <sub>3</sub> N NCs                                                                                                          | S7–S8   |
| 8. Proposed mechanism                                                                                                                                         | S8      |
| 9. Deuterium labelling experiments                                                                                                                            | S9–S10  |
| 10. Product identification                                                                                                                                    | S11–S18 |
| 11. Reference                                                                                                                                                 | S19     |
| 12. <sup>1</sup> H and <sup>13</sup> C NMR spectra                                                                                                            | S20–S49 |

## 1. Characterization of Cu<sub>3</sub>N NCs

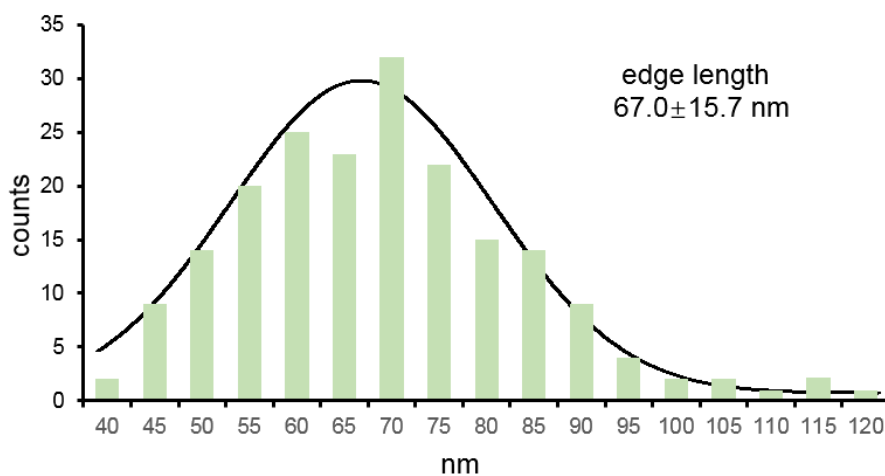

**Fig. S1** Size distribution histogram of Cu<sub>3</sub>N NCs.

## 2. Optimization of reaction conditions

**Table S1** The screen of different solvents.<sup>a</sup>

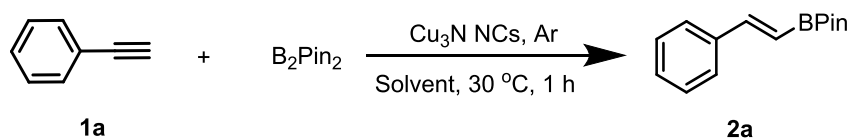

| Entry | Solvent | Yield of <b>2a</b> (%) <sup>b</sup> |
|-------|---------|-------------------------------------|
| 1     | EtOH    | 99                                  |
| 2     | MeOH    | 90                                  |
| 3     | IPA     | 25                                  |

<sup>a</sup> Reaction conditions: Cu<sub>3</sub>N NCs (5 mol% of Cu), **1a** (0.5 mmol), B<sub>2</sub>Pin<sub>2</sub> (0.6 mmol), solvent (2 mL), 30 °C, 1 h, Ar. <sup>b</sup> Yield was calculated by <sup>1</sup>H NMR analysis using 1,4-nitrobenzene as an internal standard.

### 3. Comparison of Cu<sub>3</sub>N NCs catalytic system and reported Cu catalytic systems for hydroboration of **1a** with B<sub>2</sub>Pin<sub>2</sub>

**Table S2** Heterogeneous Cu catalysts for the hydroboration of **1a** with B<sub>2</sub>Pin<sub>2</sub>

| Catalyst                            | Additives                      | Solvent                             | Temp. (°C) | TON   | Ref.             |
|-------------------------------------|--------------------------------|-------------------------------------|------------|-------|------------------|
| Cu <sub>3</sub> N NCs               | -                              | EtOH                                | 30         | 912   | <i>This work</i> |
| Cu-3D-MOF                           | K <sub>2</sub> CO <sub>3</sub> | CH <sub>3</sub> CN/H <sub>2</sub> O | rt         | 41734 | S1               |
| Cu-TiC                              | H <sub>2</sub> O               | Toluene                             | 80         | 612   | S2               |
| Cu-NPs/rGO                          | MeONa                          | MeOH/<br>1,4-dioxane                | 50         | 14    | S3               |
| PCN-222(Cu)                         | 3-methyl<br>pyridine           | EtOH/<br>H <sub>2</sub> O           | 80         | 66    | S4               |
| Cu-MOF                              | MeONa                          | EtOH                                | 25         | 310   | S5               |
| Cu-CeO <sub>2</sub>                 | -                              | EtOH                                | 90         | 192   | S6               |
| Cu <sub>2</sub> O RD                | PPh <sub>3</sub>               | 1,4-dioxane                         | 60         | 14    | S7               |
| Cu-CuFe <sub>2</sub> O <sub>4</sub> | MeONa                          | MeOH                                | rt         | 190   | S8               |
| Nano-Cu@Si                          | MeONa                          | EtOH                                | rt         | 10    | S9               |
| CuFe <sub>2</sub> O <sub>4</sub>    | <i>t</i> -BuOK                 | MeOH                                | 50         | 180   | S10              |
| micro copper<br>powder              | MeONa                          | MeOH                                | rt         | 9     | S11              |
| Basic CuCO <sub>3</sub>             | PPh <sub>3</sub>               | H <sub>2</sub> O                    | 27         | 16    | S12              |
| Cu/MgO                              | PPh <sub>3</sub>               | Toluene                             | 45         | 23    | S13              |

Note: rt = room temperature.

#### 4. Preparation and characterization of Cu<sub>2</sub>O NCs

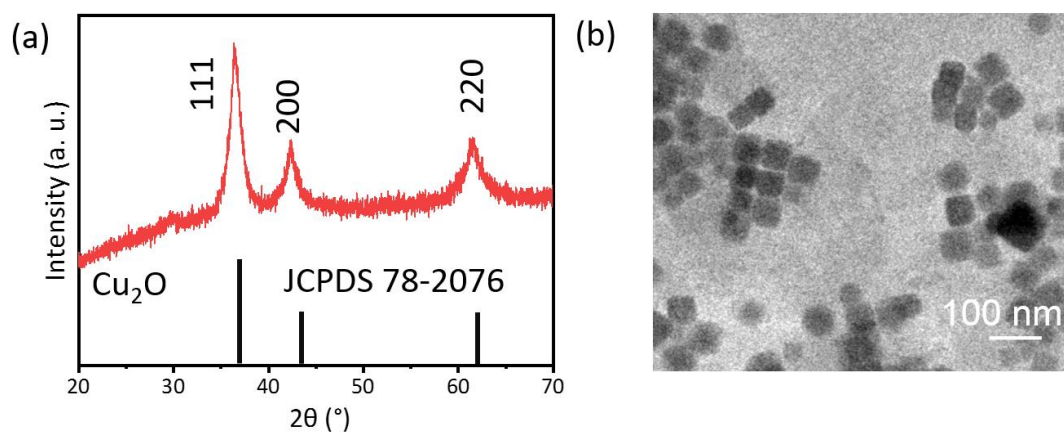

**Fig. S2** (a) PXRD pattern and (b) TEM image of Cu<sub>2</sub>O NCs.

The Cu<sub>2</sub>O NCs was prepared by a facile wet chemical approach.<sup>S14</sup> In a typical reaction, 0.075 mol L<sup>-1</sup> of NaOH (10 mL) was added dropwise to 0.5 mol L<sup>-1</sup> of CuSO<sub>4</sub> aqueous solution (5 mL) under stirring at pH = 10.5. Subsequently, the 0.1 mol L<sup>-1</sup> of ascorbic acid (13 mL) was added dropwise into the solution under continuous stirring and was reacted for 1 h at room temperature. Then, a yellow precipitate was obtained (pH = 4.0–4.5). To remove any impurities, redispersion and precipitation cycles were repeated using a water and ethanol to afford the yellow powder.

## 5. Reuse experiments

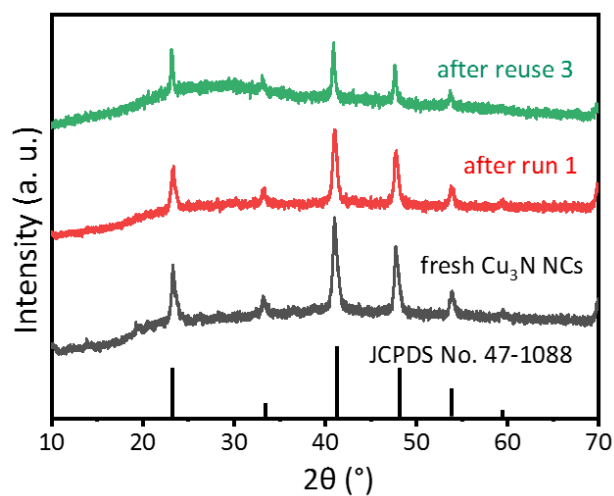

**Fig. S3** PXRD patterns of fresh and reused  $\text{Cu}_3\text{N}$  NCs.

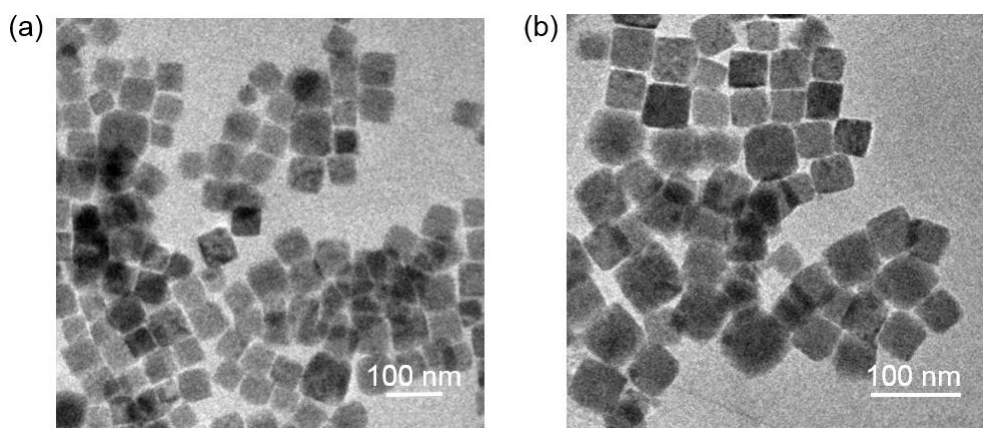

**Fig. S4** TEM images of  $\text{Cu}_3\text{N}$  NCs (a) fresh and (b) after run 1.

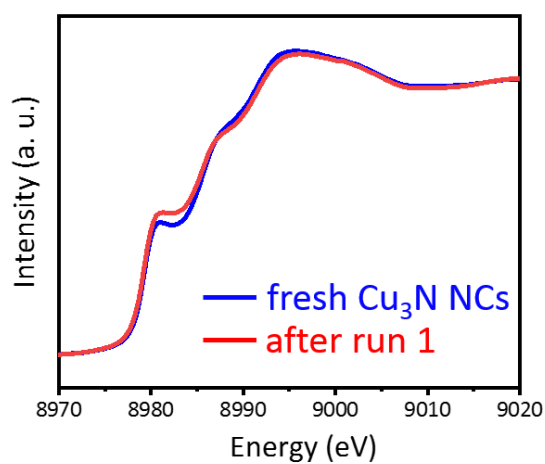

**Fig. S5** Cu *K*-edge XANES spectra of fresh  $\text{Cu}_3\text{N}$  NCs (blue line) and  $\text{Cu}_3\text{N}$  NCs after run 1 (red line).

## 6. Limitation of substrate scope

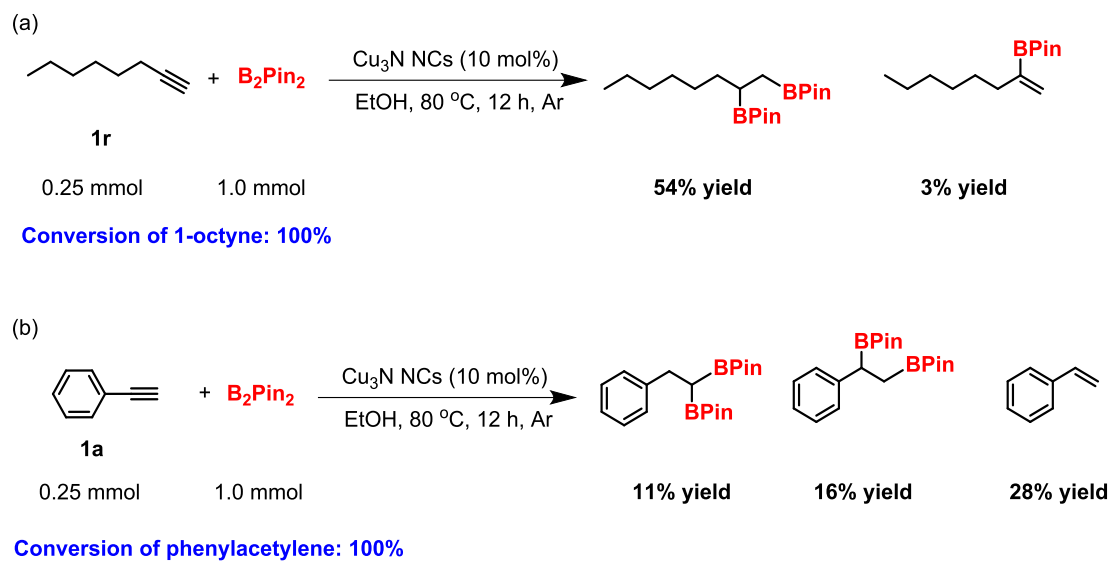

**Scheme S1** Dihydroboration of (a) **1r** and (b) **1a**. Reaction conditions: **1r** or **1a** (0.25 mmol),  $\text{B}_2\text{Pin}_2$  (1.0 mmol),  $\text{Cu}_3\text{N NCs}$  (5.0 mg), EtOH (1.0 mL), 80 °C, Ar, 12 h. Yields were calculated by  $^1\text{H NMR}$  analysis using 1,4-nitrobenzene as an internal standard.

## 7. Lewis acid-base property of Cu<sub>3</sub>N NCs

In a typical NH<sub>3</sub>-TPD experiment, about 30 mg of the Cu<sub>3</sub>N NCs was loaded in U-shaped quartz cell above a small amount of quartz wool. The sample was treated under helium (He) flow at 100 °C for 60 min. After the treatment, the temperature was cooled to 30 °C. For NH<sub>3</sub> adsorption, thermally treated sample was saturated with 5.5% NH<sub>3</sub>/He mixture at 100 °C. After pulse NH<sub>3</sub> adsorption, the sample was flushed in He flow at 100 °C for removal of physically adsorbed NH<sub>3</sub> on the sample. An NH<sub>3</sub>-TPD profile of the sample was recorded by increasing the temperature from 100 to 500 °C at a heating rate of 10 °C min<sup>-1</sup> under 30 mL min<sup>-1</sup> of He flow. The desorbed products were analyzed by a mass spectrometer. The desorbed NH<sub>3</sub> and CO<sub>2</sub> were identified on the basis of the intensity of the mass fragments with  $m/z = 16$  and 44, respectively. The peak  $m/z = 16$  was used for NH<sub>3</sub> because the parent peak.

For CO<sub>2</sub> adsorption experiment, the 10% CO<sub>2</sub>/H<sub>2</sub> gas was used instead of 5.5% NH<sub>3</sub>/He gas under same procedure.

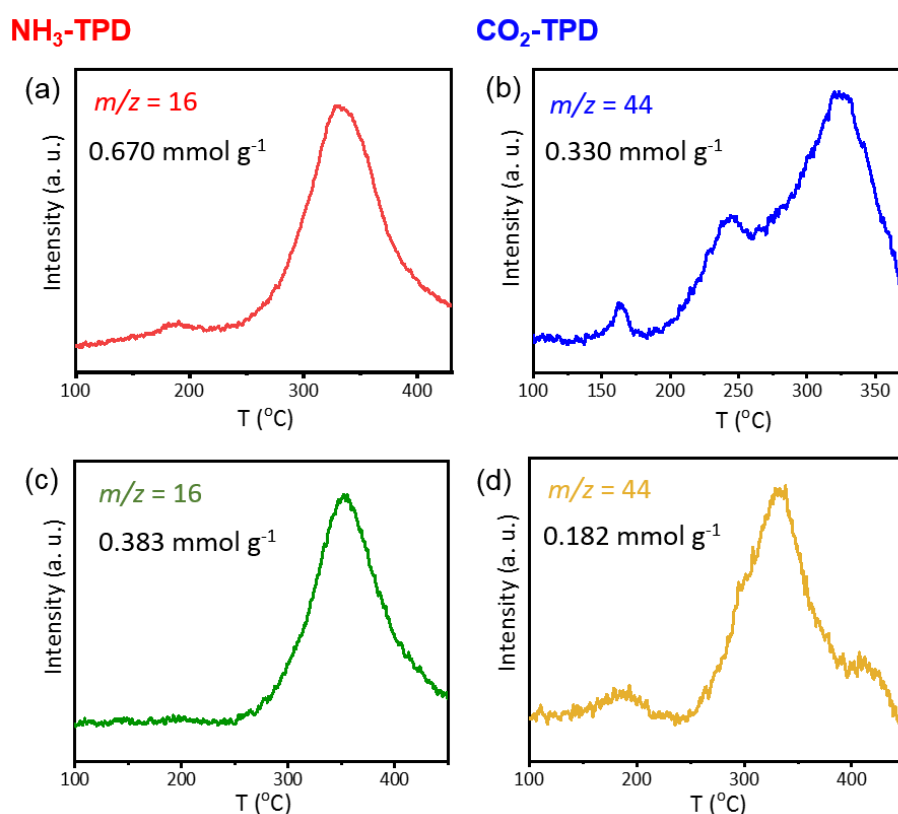

**Fig. S6** (a) NH<sub>3</sub>-TPD and (b) CO<sub>2</sub>-TPD signals of Cu<sub>3</sub>N NCs monitored at  $m/z$  16 and 44. (c) NH<sub>3</sub>-TPD and (d) CO<sub>2</sub>-TPD signals of Cu<sub>3</sub>N NCs (without NH<sub>3</sub> or CO<sub>2</sub> pretreatment) monitored at  $m/z$  16 and 44.

**Table S3** The amount of Lewis acid and base

|                       | Lewis acid site amount<br>(mmol g <sup>-1</sup> ) | Lewis base site amount<br>(mmol g <sup>-1</sup> ) |
|-----------------------|---------------------------------------------------|---------------------------------------------------|
| Cu <sub>3</sub> N NCs | 0.287                                             | 0.148                                             |

The details for the Lewis acid-base property of Cu<sub>3</sub>N NCs were investigated through NH<sub>3</sub> and CO<sub>2</sub>-TPD analyses (Fig. S6). Firstly, the NH<sub>3</sub> and CO<sub>2</sub>-TPD spectra of Cu<sub>3</sub>N NCs show the amounts of Lewis acid-base sites of Cu<sub>3</sub>N NCs, which are 0.670 and 0.330 mmol g<sup>-1</sup>, respectively (Fig. S6a and S6b). Furthermore, the experiments using Cu<sub>3</sub>N NCs without NH<sub>3</sub> or CO<sub>2</sub> pretreatment were performed, and the amounts of Lewis acid-base sites were calculated to be 0.383 and 0.182 mmol g<sup>-1</sup>, respectively (Fig. S6c and S6d). Based on these results, the exact amount of Lewis acid-base sites of Cu<sub>3</sub>N NCs except for the other components are estimated as shown in Table S3.

## 8. Proposed mechanism

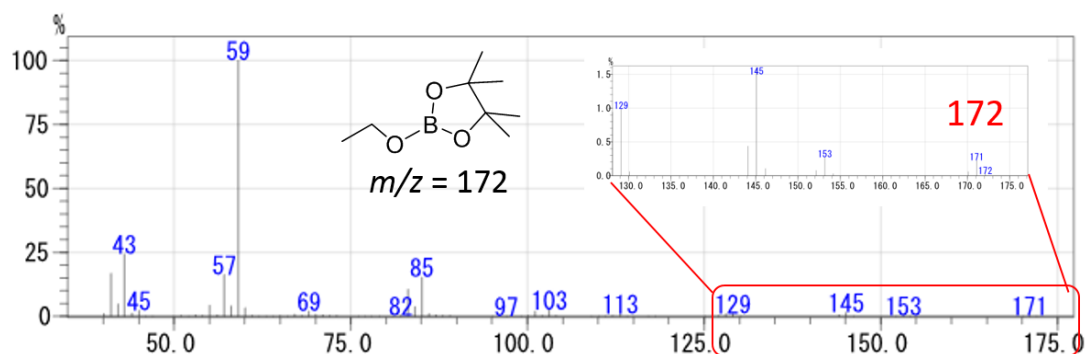

**Fig. S7** EI-MS spectrum of 2-ethoxy-4,4,5,5-tetramethyl-1,3,2-dioxaborolane.



## 9. Deuterium labelling experiments

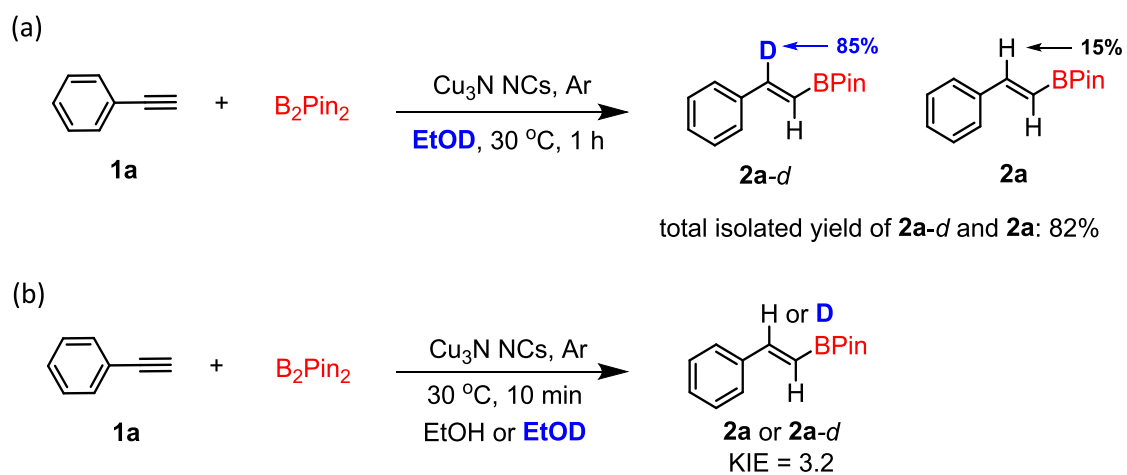

**Scheme S2** The deuterium-labelling experiments.

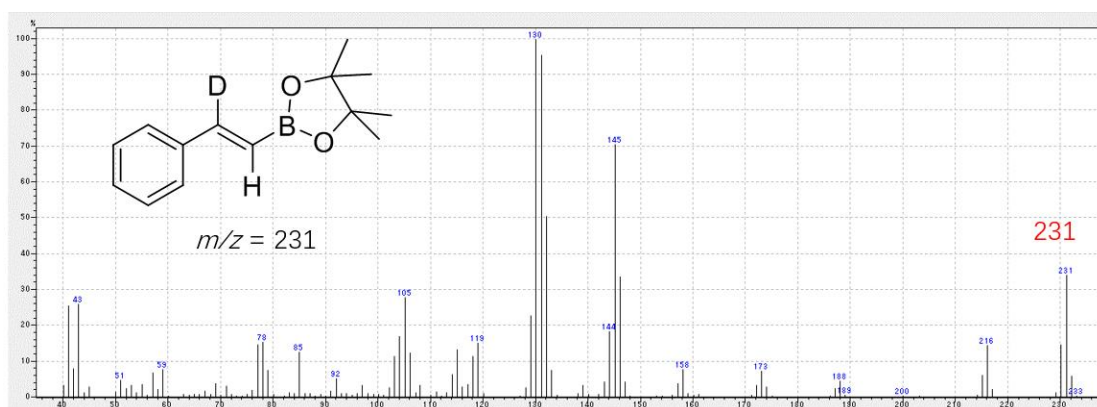

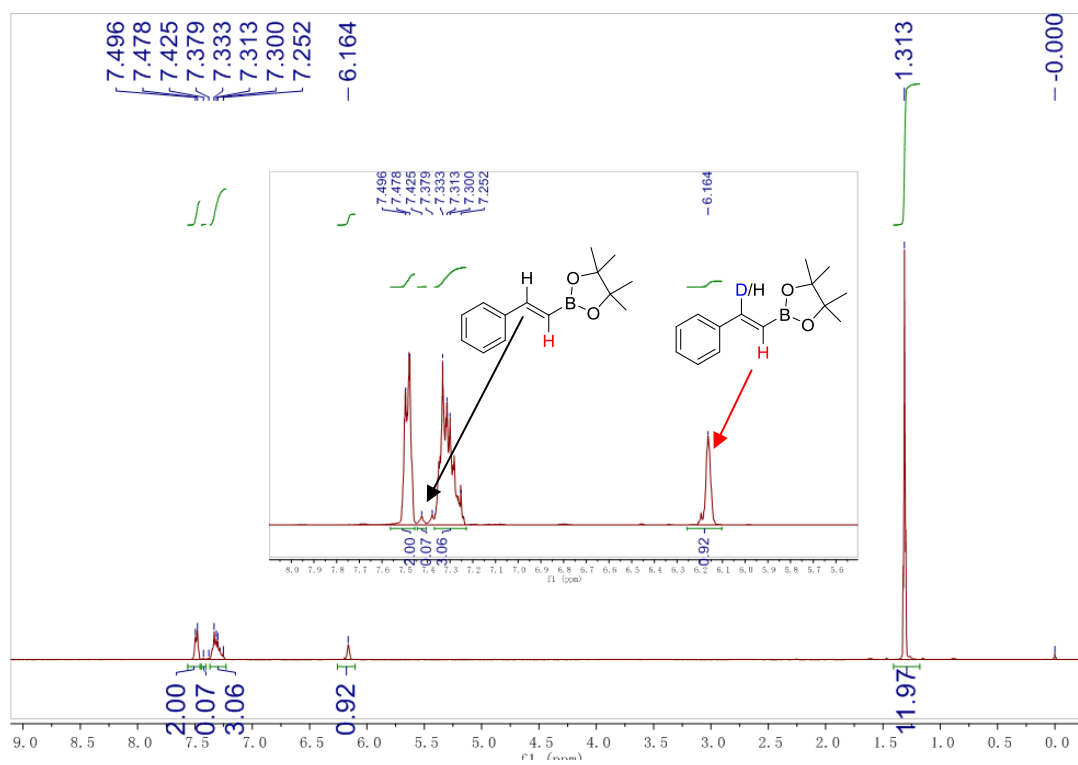

**Fig. S9**  $^1\text{H}$  NMR analysis of **Scheme S2a**.

## 10. Product identification

General information: chemical shifts were reported in parts per million (ppm) relative to the signal (0.00 ppm) for internal tetramethylsilane in CDCl<sub>3</sub>. The <sup>13</sup>C NMR spectral data were reported using the following standard chemical shift: CDCl<sub>3</sub> (77.16 ppm). NMR multiplicities are reported using the following abbreviations: s, singlet; d, doublet; t, triplet; q, quartet; m, multiplet; br, broad; *J*, coupling constants in hertz.

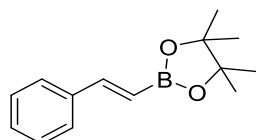

**(*E*)-4,4,5,5-tetramethyl-2-styryl-1,3,2-dioxaborolane (2a)** <sup>S6</sup>: CAS registry No. [83947-56-2], white solid; <sup>1</sup>H NMR (400 MHz, CDCl<sub>3</sub>): δ 7.51–7.48 (m, 2H), 7.40 (d, *J* = 18.4 Hz, 1H), 7.36–7.26 (m, 3H), 6.17 (d, *J* = 18.4 Hz, 1H), 1.31 (s, 12H); <sup>13</sup>C NMR (100 MHz, CDCl<sub>3</sub>): δ 149.7, 137.7, 129.1, 128.7, 127.2, 83.5, 25.0.

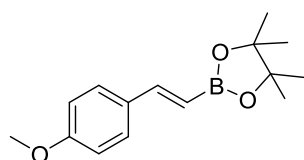

**(*E*)-2-(4-methoxystyryl)-4,4,5,5-tetramethyl-1,3,2-dioxaborolane (2b)** <sup>S6</sup>: CAS registry No. [149777-83-3], colorless liquid; <sup>1</sup>H NMR (400 MHz, CDCl<sub>3</sub>): δ 7.43 (d, *J* = 8.0 Hz, 2H), 7.36 (d, *J* = 18.4 Hz, 1H), 6.85 (d, *J* = 8.0 Hz, 2H), 6.01 (d, *J* = 18.4 Hz, 1H), 3.78 (s, 3H), 1.30 (s, 12H); <sup>13</sup>C NMR (100 MHz, CDCl<sub>3</sub>): δ 160.4, 149.1, 130.4, 128.5, 114.0, 83.2, 55.3, 24.9.

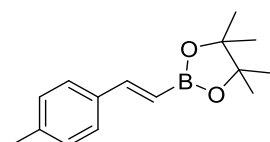

**(*E*)-4,4,5,5-tetramethyl-2-(4-methylstyryl)-1,3,2-dioxaborolane (2c)** <sup>S6</sup>: CAS registry No. [149777-84-4], yellow liquid; <sup>1</sup>H NMR (400 MHz, CDCl<sub>3</sub>): δ 7.42–7.32 (m, 3H), 7.13 (d, *J* = 8.0 Hz, 2H), 6.11 (d, *J* = 18.8 Hz, 1H), 2.33 (s, 3H), 1.30 (s, 12H); <sup>13</sup>C NMR (100 MHz, CDCl<sub>3</sub>): δ 149.6, 139.0, 134.9, 129.4, 127.1, 83.3, 24.9, 21.4.

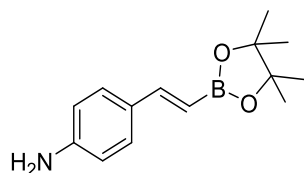

**(*E*)-4-(2-(4,4,5,5-tetramethyl-1,3,2-dioxaborolan-2-yl)vinyl)aniline (2d)** <sup>S8</sup>: CAS registry No. [2159091-30-0], yellow solid; <sup>1</sup>H NMR (400 MHz, CDCl<sub>3</sub>): δ 7.35–7.24 (m, 3H), 6.62 (d, *J* = 8.4 Hz, 2H), 5.93 (d, *J* = 18.4 Hz, 1H), 3.79 (s, 2H), 1.30 (s, 12H);

$^{13}\text{C}$  NMR (100 MHz,  $\text{CDCl}_3$ ):  $\delta$  149.7, 147.5, 128.6, 128.1, 114.9, 83.1, 24.8.

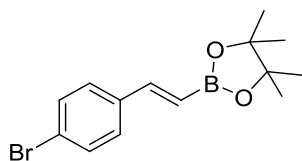

**(E)-2-(4-bromostyryl)-4,4,5,5-tetramethyl-1,3,2-dioxaborolane (2e)**<sup>S1</sup>: CAS registry No. [1242770-51-9], white solid;  $^1\text{H}$  NMR (400 MHz,  $\text{CDCl}_3$ ):  $\delta$  7.46 (d,  $J$  = 8.8 Hz, 2H), 7.42–7.28 (m, 3H), 6.15 (d,  $J$  = 18.4 Hz, 1H), 1.31 (s, 12H);  $^{13}\text{C}$  NMR (100 MHz,  $\text{CDCl}_3$ ):  $\delta$  148.2, 136.5, 131.9, 128.6, 123.0, 83.6, 24.9.

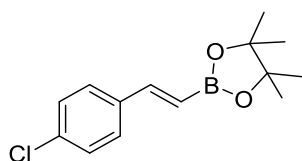

**(E)-2-(4-chlorostyryl)-4,4,5,5-tetramethyl-1,3,2-dioxaborolane (2f)**<sup>S6</sup>: CAS registry No. [223919-54-8], white solid;  $^1\text{H}$  NMR (400 MHz,  $\text{CDCl}_3$ ):  $\delta$  7.40 (d,  $J$  = 8.4 Hz, 2H), 7.38–7.29 (m, 3H), 6.13 (d,  $J$  = 18.4 Hz, 1H), 1.31 (s, 12H);  $^{13}\text{C}$  NMR (100 MHz,  $\text{CDCl}_3$ ):  $\delta$  148.1, 136.1, 134.7, 128.9, 128.3, 83.5, 24.9.

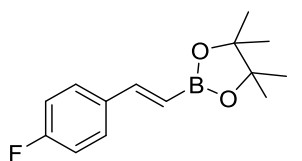

**(E)-2-(4-fluorostyryl)-4,4,5,5-tetramethyl-1,3,2-dioxaborolane (2g)**<sup>S1</sup>: CAS registry No. [504433-86-7], colorless liquid;  $^1\text{H}$  NMR (400 MHz,  $\text{CDCl}_3$ ):  $\delta$  7.51–7.42 (m, 2H), 7.36 (d,  $J$  = 18.4 Hz, 1H), 7.01 (t,  $J$  = 8.8 Hz, 2H), 6.08 (d,  $J$  = 18.4 Hz, 1H), 1.31 (s, 12H);  $^{13}\text{C}$  NMR (100 MHz,  $\text{CDCl}_3$ ):  $\delta$  163.2 (d,  $J$  = 248.0 Hz), 148.2, 133.8 (d,  $J$  = 4.0 Hz), 128.7 (d,  $J$  = 8.0 Hz), 115.6 (d,  $J$  = 22.0 Hz), 83.5, 24.9.

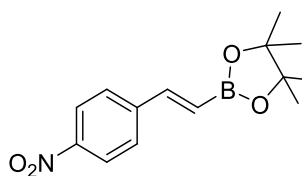

**(E)-4,4,5,5-tetramethyl-2-(4-nitrostyryl)-1,3,2-dioxaborolane (2h)**<sup>S4</sup>: CAS registry No. [149777-86-6], white solid;  $^1\text{H}$  NMR (400 MHz,  $\text{CDCl}_3$ ):  $\delta$  8.20 (d,  $J$  = 8.8 Hz, 2H), 7.61 (d,  $J$  = 8.8 Hz, 2H), 7.42 (d,  $J$  = 18.4 Hz, 1H), 6.33 (d,  $J$  = 18.4 Hz, 1H), 1.33 (s, 12H);  $^{13}\text{C}$  NMR (100 MHz,  $\text{CDCl}_3$ ):  $\delta$  147.8, 146.7, 143.7, 127.7, 124.1, 83.9, 24.9.

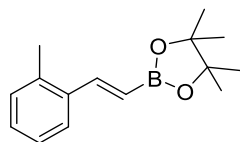

**(E)-4,4,5,5-tetramethyl-2-(2-methylstyryl)-1,3,2-dioxaborolane (2i)** <sup>S6</sup>: CAS registry No. [1294009-26-9], yellow liquid; <sup>1</sup>H NMR (400 MHz, CDCl<sub>3</sub>): δ 7.65 (d, *J* = 18.4 Hz, 1H), 7.57–7.53 (m, 1H), 7.20–7.12 (m, 3H), 6.08 (d, *J* = 18.4 Hz, 1H), 2.42 (s, 3H), 1.31 (s, 12H); <sup>13</sup>C NMR (100 MHz, CDCl<sub>3</sub>): δ 147.2, 136.8, 136.4, 130.5, 128.7, 126.2, 125.9, 83.4, 24.9, 19.9.

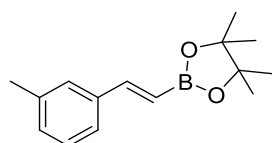

**(E)-4,4,5,5-tetramethyl-2-(3-methylstyryl)-1,3,2-dioxaborolane (2j)** <sup>S6</sup>: CAS registry No. [1421061-31-5], yellow liquid; <sup>1</sup>H NMR (400 MHz, CDCl<sub>3</sub>): δ 7.37 (d, *J* = 18.4 Hz, 1H), 7.33–7.26 (m, 2H), 7.24–7.18 (m, 1H), 7.09 (d, *J* = 7.2 Hz, 1H), 6.15 (d, *J* = 18.4 Hz, 1H), 2.33 (s, 3H), 1.30 (s, 12H); <sup>13</sup>C NMR (100 MHz, CDCl<sub>3</sub>): δ 149.7, 138.1, 137.5, 129.8, 128.5, 127.8, 124.3, 83.3, 24.9, 21.4.

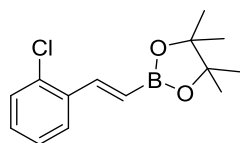

**(E)-2-(2-chlorostyryl)-4,4,5,5-tetramethyl-1,3,2-dioxaborolane (2k)** <sup>S4</sup>: CAS registry No. [1355094-04-0], yellow liquid; <sup>1</sup>H NMR (400 MHz, CDCl<sub>3</sub>): δ 7.79 (d, *J* = 18.4 Hz, 1H), 7.62 (d, *J* = 7.6 Hz, 1H), 7.42–7.32 (m, 1H), 7.31–7.18 (m, 2H), 6.17 (d, *J* = 18.4 Hz, 1H), 1.31 (s, 12H); <sup>13</sup>C NMR (100 MHz, CDCl<sub>3</sub>): δ 145.0, 135.7, 133.9, 129.9, 129.8, 127.1, 126.9, 83.5, 24.9.

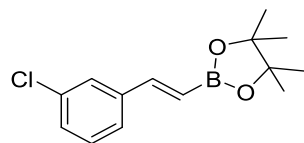

**(E)-2-(3-chlorostyryl)-4,4,5,5-tetramethyl-1,3,2-dioxaborolane (2l)** <sup>S4</sup>: CAS registry No. [871125-84-7], yellow liquid; <sup>1</sup>H NMR (400 MHz, CDCl<sub>3</sub>): δ 7.45 (s, 1H), 7.34–7.24 (m, 4H), 6.17 (d, *J* = 18.4 Hz, 1H), 1.31 (s, 12H); <sup>13</sup>C NMR (100 MHz, CDCl<sub>3</sub>): δ 147.9, 139.4, 134.7, 129.9, 128.8, 127.0, 125.3, 83.6, 24.9.

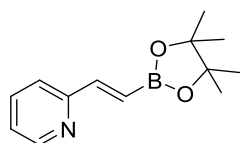

**(E)-2-(2-(4,4,5,5-tetramethyl-1,3,2-dioxaborolan-2-yl)vinyl)pyridine (3m)** <sup>S6</sup>: CAS

registry No. [161395-83-1], yellow oil;  $^1\text{H}$  NMR (400 MHz,  $\text{CDCl}_3$ ):  $\delta$  8.60 (d,  $J = 4.8$  Hz, 1H), 7.69–7.62 (m, 1H), 7.46 (d,  $J = 18.0$  Hz, 1H), 7.40 (d,  $J = 7.6$  Hz, 1H), 7.23–7.16 (m, 1H), 6.63 (d,  $J = 18.0$  Hz, 1H), 1.31 (s, 12H);  $^{13}\text{C}$  NMR (100 MHz,  $\text{CDCl}_3$ ):  $\delta$  155.6, 149.8, 148.9, 136.6, 123.2, 122.3, 83.6, 24.9.

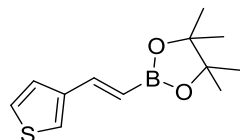

**(E)-4,4,5,5-tetramethyl-2-(2-(thiophen-3-yl)vinyl)-1,3,2-dioxaborolane (2n)** <sup>S4</sup>: CAS registry No. [736987-75-0], colorless oil;  $^1\text{H}$  NMR (400 MHz,  $\text{CDCl}_3$ ):  $\delta$  7.38 (d,  $J = 18.4$  Hz, 1H), 7.32–7.28 (m, 2H), 7.27–7.24 (m, 1H), 5.94 (d,  $J = 18.4$  Hz, 1H), 1.30 (s, 12H);  $^{13}\text{C}$  NMR (100 MHz,  $\text{CDCl}_3$ ):  $\delta$  143.3, 141.4, 126.2, 125.2, 125.0, 83.4, 24.9.

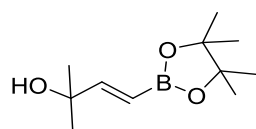

**(E)-2-methyl-4-(4,4,5,5-tetramethyl-1,3,2-dioxaborolan-2-yl)but-3-en-2-ol (2o)** <sup>S5</sup>: CAS registry No. [581802-26-8], colorless oil;  $^1\text{H}$  NMR (400 MHz,  $\text{CDCl}_3$ ):  $\delta$  6.72 (d,  $J = 18.4$  Hz, 1H), 5.61 (d,  $J = 18.4$  Hz, 1H), 1.62 (s, 1H), 1.31 (s, 6H), 1.28 (s, 12H);  $^{13}\text{C}$  NMR (100 MHz,  $\text{CDCl}_3$ ): 159.9, 83.4, 71.9, 29.2, 24.9.

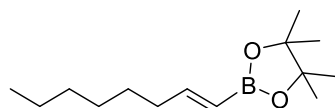

**(E)-4,4,5,5-tetramethyl-2-(oct-1-en-1-yl)-1,3,2-dioxaborolane (2p)** <sup>S6</sup>: CAS registry No. [83947-55-1], colorless oil;  $^1\text{H}$  NMR (400 MHz,  $\text{CDCl}_3$ ):  $\delta$  6.64 (dt,  $J = 18.0, 6.4$  Hz, 1H), 5.42 (d,  $J = 18.0$ , 1H), 2.21–2.09 (m, 2H), 1.45–1.29 (m, 2H), 1.29–1.25 (m, 18H), 0.88 (t,  $J = 5.2$  Hz, 3H);  $^{13}\text{C}$  NMR (100 MHz,  $\text{CDCl}_3$ ):  $\delta$  155.0, 83.1, 36.0, 31.9, 29.1, 28.3, 24.9, 22.7, 14.2.

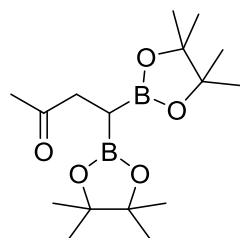

**4,4-bis(4,4,5,5-tetramethyl-1,3,2-dioxaborolan-2-yl)butan-2-one (2q)** <sup>S15</sup>: CAS registry No. [1175712-38-5], yellow oil;  $^1\text{H}$  NMR (400 MHz,  $\text{CDCl}_3$ ):  $\delta$  2.74 (d,  $J = 8.0$  Hz, 2H), 2.11 (s, 3H), 1.24 (s, 12H), 1.21 (s, 12H), 0.97 (t,  $J = 8.0$  Hz, 1H);  $^{13}\text{C}$  NMR (100 MHz,  $\text{CDCl}_3$ ):  $\delta$  209.1, 83.2, 40.7, 29.1, 24.8, 24.6.

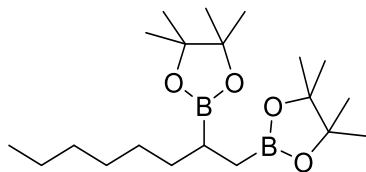

**2,2'-(octane-1,2-diyl)bis(4,4,5,5-tetramethyl-1,3,2-dioxaborolane) (2r)** <sup>S16</sup>: CAS registry No. [1240790-15-1], colorless liquid; <sup>1</sup>H NMR (400 MHz, CDCl<sub>3</sub>): δ 1.52–1.43 (m, 1H), 1.39–1.19 (m, 32H), 1.17–1.05 (m, 2H), 0.96–0.77 (m, 5H); <sup>13</sup>C NMR (100 MHz, CDCl<sub>3</sub>): δ 82.9, 82.9, 34.0, 32.0, 29.7, 29.0, 25.1, 25.0, 24.9, 24.9, 22.8, 14.3.

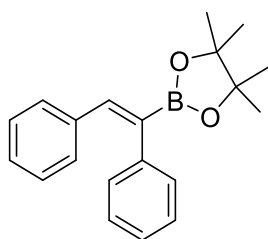

**(Z)-2-(1,2-diphenylvinyl)-4,4,5,5-tetramethyl-1,3,2-dioxaborolane (2s)** <sup>S6</sup>: CAS registry No. [264144-59-4], white solid; <sup>1</sup>H NMR (400 MHz, CDCl<sub>3</sub>): δ 7.36 (s, 1H), 7.31–7.23 (m, 2H), 7.22–7.14 (m, 3H), 7.13–7.09 (m, 3H), 7.07–7.03 (m, 2H), 1.31 (s, 12H); <sup>13</sup>C NMR (100 MHz, CDCl<sub>3</sub>): δ 143.3, 140.6, 137.1, 130.1, 129.0, 128.4, 128.0, 127.7, 126.4, 83.9, 24.9.

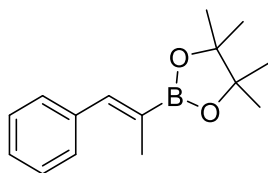

**(Z)-4,4,5,5-tetramethyl-2-(1-phenylprop-1-en-2-yl)-1,3,2-dioxaborolane (2t)** <sup>S1</sup>: CAS registry No. [141091-35-2], colorless oil; <sup>1</sup>H NMR (400 MHz, CDCl<sub>3</sub>): δ 7.41–7.29 (m, 4H), 7.26–7.19 (m, 2H), 1.99 (d, *J* = 1.7 Hz, 3H), 1.31 (s, 12H); <sup>13</sup>C NMR (100 MHz, CDCl<sub>3</sub>): δ 142.5, 138.1, 129.6, 128.2, 127.2, 83.7, 25.0, 16.1.

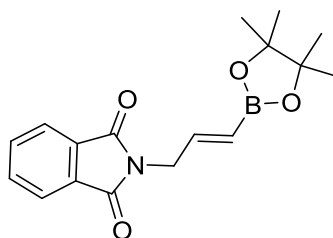

**(E)-2-(3-(4,4,5,5-tetramethyl-1,3,2-dioxaborolan-2-yl)allyl)isoindoline-1,3-dione (2u)** <sup>S17</sup>: CAS registry No. [581802-29-1], white solid; <sup>1</sup>H NMR (400 MHz, CDCl<sub>3</sub>): δ 7.95–7.83 (m, 2H), 7.80–7.71 (m, 2H), 6.55 (dt, *J* = 18.0, 4.4 Hz, 1H), 5.49 (d, *J* = 18.0 Hz, 1H), 4.38 (s, 2H), 1.24 (s, 12H); <sup>13</sup>C NMR (100 MHz, CDCl<sub>3</sub>): δ 167.8, 145.3, 134.1, 132.1, 123.4, 83.4, 41.0, 24.8.

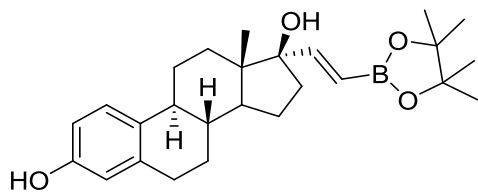

**(8R,9S,13S,14S,17R)-13-methyl-17-((E)-2-(4,4,5,5-tetramethyl-1,3,2-dioxaborolan-2-yl)vinyl)-7,8,9,11,12,13,14,15,16,17-decahydro-6H-cyclopenta[*a*]phenanthrene-3,17-diol (2v)**<sup>S2</sup>: CAS registry No. [2661398-14-5], white solid; <sup>1</sup>H NMR (400 MHz, CDCl<sub>3</sub>): 7.01–6.86 (m, 3H), 6.64–6.54 (m, 2H), 5.67 (d, *J* = 18.0 Hz, 1H), 2.85–2.61 (m, 2H), 2.05–1.59 (m, 6H), 1.34 (s, 12H), 1.27–1.14 (m, 8H), 0.86 (s, 3H); <sup>13</sup>C NMR (100 MHz, CDCl<sub>3</sub>): 158.7, 154.2, 138.5, 132.5, 126.1, 115.6, 112.2, 85.1, 84.1, 49.3, 47.3, 42.4, 39.0, 37.3, 32.4, 29.8, 27.3, 25.9, 25.0, 24.8, 23.5, 14.3.

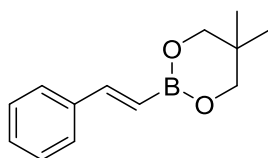

**(E)-5,5-dimethyl-2-styryl-1,3,2-dioxaborinane (3a)**<sup>S18</sup>: CAS registry No. [202864-71-9], colorless oil; <sup>1</sup>H NMR (400 MHz, CDCl<sub>3</sub>): δ 7.46 (d, *J* = 8.0 Hz, 2H), 7.39–7.20 (m, 4H), 6.11 (d, *J* = 18.4 Hz, 1H), 3.69 (s, 4H), 0.99 (s, 6H); <sup>13</sup>C NMR (100 MHz, CDCl<sub>3</sub>): δ 147.2, 137.9, 128.6, 127.1, 72.3, 31.9, 22.0.

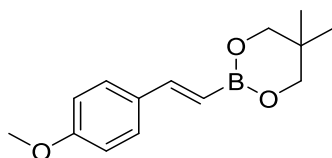

**(E)-2-(4-methoxystyryl)-5,5-dimethyl-1,3,2-dioxaborinane (3b)**<sup>S19</sup>: CAS registry No. [905966-49-6], colorless oil; <sup>1</sup>H NMR (400 MHz, CDCl<sub>3</sub>): δ 7.42 (d, *J* = 6.8 Hz, 2H), 7.28 (d, *J* = 18.4 Hz, 1H), 6.84 (d, *J* = 6.8 Hz, 2H), 5.95 (d, *J* = 18.4 Hz, 1H), 3.77 (s, 3H), 3.67 (s, 4H), 0.98 (s, 6H); <sup>13</sup>C NMR (100 MHz, CDCl<sub>3</sub>): δ 160.1, 146.7, 130.8, 128.4, 114.0, 72.2, 55.3, 31.9, 21.90.

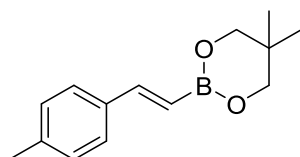

**(E)-2-(4-methylstyryl)-5,5-dimethyl-1,3,2-dioxaborinane (3c)**<sup>S20</sup>: CAS registry No. [938080-15-0], colorless oil; <sup>1</sup>H NMR (400 MHz, CDCl<sub>3</sub>): δ 7.38 (d, *J* = 8.0 Hz, 2H), 7.30 (d, *J* = 18.0 Hz, 1H), 7.13 (d, *J* = 8.0 Hz, 2H), 6.04 (d, *J* = 18.0 Hz, 1H), 3.69 (s, 4H), 2.34 (s, 3H), 1.00 (s, 6H); <sup>13</sup>C NMR (100 MHz, CDCl<sub>3</sub>): δ 147.2, 138.7, 135.2, 129.4, 127.1, 72.3, 32.0, 22.0, 21.4.



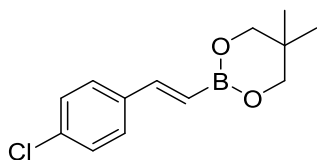

**(E)-2-(4-chlorostyryl)-5,5-dimethyl-1,3,2-dioxaborinane (3d)**<sup>S21</sup>: CAS registry No. [2493295-76-2], white solid; <sup>1</sup>H NMR (400 MHz, CDCl<sub>3</sub>): δ 7.45–7.37 (m, 2H), 7.32–7.26 (m, 3H), 6.07 (d, *J* = 18.0 Hz, 1H), 3.70 (s, 4H), 1.00 (s, 6H); <sup>13</sup>C NMR (100 MHz, CDCl<sub>3</sub>): δ 145.8, 136.4, 134.3, 128.9, 128.3, 72.4, 32.0, 22.0.

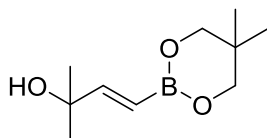

**(E)-4-(5,5-dimethyl-1,3,2-dioxaborinan-2-yl)-2-methylbut-3-en-2-ol (3e)**: colorless liquid; <sup>1</sup>H NMR (400 MHz, CDCl<sub>3</sub>): δ 6.64 (d, *J* = 18.0 Hz, 1H), 5.52 (d, *J* = 18.0 Hz, 1H), 3.65 (s, 4H), 1.31 (s, 6H), 0.98 (s, 6H); <sup>13</sup>C NMR (100 MHz, CDCl<sub>3</sub>): δ 157.4, 72.2, 71.8, 31.9, 29.3, 22.0. IR (ATR): ν<sub>max</sub> = 3470, 2964, 1640, 1423, 1312, 1250, 1083, 755, 638 cm<sup>-1</sup>. HRMS (ESI): *m/z* Calculated for C<sub>10</sub>H<sub>19</sub>BO<sub>3</sub> [M]<sup>+</sup>: 198.1427, found 198.1429.

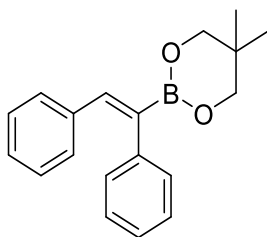

**(Z)-2-(1,2-diphenylvinyl)-5,5-dimethyl-1,3,2-dioxaborinane (3f)**<sup>S22</sup>: CAS registry No. [1942884-64-1], white solid; <sup>1</sup>H NMR (400 MHz, CDCl<sub>3</sub>): δ 7.34 (s, 1H), 7.30–7.24 (m, 2H), 7.23–7.15 (m, 1H), 7.14–7.06 (m, 5H), 7.04–6.97 (m, 2H), 3.69 (s, 4H), 1.00 (s, 6H); <sup>13</sup>C NMR (100 MHz, CDCl<sub>3</sub>): δ 141.4, 141.2, 137.4, 130.1, 128.9, 128.4, 127.9, 127.4, 126.1, 72.6, 31.8, 22.0.

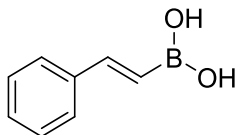

**(E)-2-phenylvinylboronic acid (4a)**<sup>S23</sup>: CAS registry No. [4363-35-3], white solid; <sup>1</sup>H NMR (400 MHz, CDCl<sub>3</sub>): δ 7.78 (d, *J* = 18.0 Hz, 1H), 7.62 (d, *J* = 8.0 Hz, 2H), 7.46–7.33 (m, 3H), 6.35 (d, *J* = 18.4 Hz, 1H); <sup>13</sup>C NMR (100 MHz, CDCl<sub>3</sub>): δ 152.4, 137.3, 129.6, 128.8, 127.7.

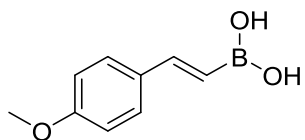

**(E)-(4-methoxystyryl)boronic acid (4b)**<sup>S24</sup>: CAS registry No. [214907-25-2], white solid; <sup>1</sup>H NMR (400 MHz, CDCl<sub>3</sub>): δ 7.72 (d, *J* = 18.0 Hz, 1H), 7.56 (d, *J* = 8.8 Hz, 2H), 6.92 (d, *J* = 8.8 Hz, 1H), 6.18 (d, *J* = 18.0 Hz, 1H), 3.84 (s, 3H); <sup>13</sup>C NMR (100 MHz, CDCl<sub>3</sub>): δ 160.9, 151.8, 130.3, 129.2, 127.5, 114.2, 55.5.

## 11. Reference

- S1. R. J. Wei, P. Y. You, H. Duan, M. Xie, R. Q. Xia, X. Chen, X. Zhao, G.-H. Ning, A. I. Cooper and D. Li, *J. Am. Chem. Soc.*, 2022, **144**, 17487–17495.
- S2. W. H. Li, J. Yang, H. Jing, J. Zhang, Y. Wang, J. Li, J. Zhao, D. Wang and Y. Li, *J. Am. Chem. Soc.*, 2021, **143**, 15453–15461.
- S3. B. Wang, L. Gao, H. Yang and G. Zheng, *ACS Appl. Mater. Interfaces*, 2021, **13**, 47530–47540.
- S4. L. J. Zhang, J. C. Yuan, L. J. Ma, Z. Y. Tang and X. M. Zhang, *J. Catal.*, 2021, **401**, 63–69.
- S5. Z. L. Wu, X. Lan, N. Gao, X. Kang, Z. Wang, T. Hu and B. Zhao, *J. Catal.*, 2021, **404**, 250–257.
- S6. J. Zhang, Z. Wang, W. Chen, Y. Xiong, W. C. Cheong, L. Zheng, W. Yan, L. Gu, C. Chen, Q. Peng, P. Hu, D. Wang and Y. Li, *Chem*, 2020, **6**, 725–737.
- S7. H. Y. Tsai, M. Madasu and M. H. Huang, *Chem. Eur. J.*, 2019, **25**, 1300–1303.
- S8. X. Zeng, C. Gong, H. Guo, H. Xu, J. Zhang and J. Xie, *New J. Chem.*, 2018, **42**, 17346–17350.
- S9. L. Xu and B. Xu, *Tetrahedron Lett.*, 2017, **58**, 2542–2546.
- S10. B. Mohan and K. H. Park, *Appl. Catal. A-Gen.*, 2016, **519**, 78–84.
- S11. J. Zhao, Z. Niu, H. Fu and Y. Li, *Chem. Comm.*, 2014, **50**, 2058–2060.
- S12. G. Stavber and Z. Časar, *Appl. Organometal. Chem.*, 2013, **27**, 159–165.
- S13. A. Grirrane, A. Corma and H. Garcia, *Chem. Eur. J.*, 2011, **17**, 2467–2478.
- S14. A. M. Elseman, M. S. Selim, L. Luo, C. Y. Xu, G. Wang, Y. Jiang, D. B. Liu, L. P. Liao, Z. Hao and Q. L. Song, *ChemSusChem*, 2019, **12**, 3808–3816.
- S15. G. Gao, Z. Kuang and Q. Song, *Org. Chem. Front.*, 2018, **5**, 2249–2253.
- S16. M. Huang, J. Hu, S. Shi, A. Friedrich, J. Krebs, S. A. Westcott, U. Radius, T. B. Marder, *Chem. Eur. J.*, 2022, **28**, e202200480.
- S17. H. Ben-Daat, C. L. Rock, M. Flores, T. L. Groy, A. C. Bowman and R. J. Trovitch, *Chem. Commun.*, 2017, **53**, 7333–7336.
- S18. A. Khan, A. M. Asiri, S. A. Kosa, H. Garcia and A. Grirrane, *J. Catal.*, 2015, **329**, 401–412.
- S19. A. Dominguez-Molano, G. Bru, O. Salvado, R. J. Maza, J. J. Carbó and E. Fernández, *Chem. Commun.*, 2021, **57**, 13361–13364.
- S20. S. Ueno, N. Chatani and F. Kakiuchi, *J. Org. Chem.*, 2007, **72**, 9, 3600–3602.
- S21. Y. Zhang, Y. Li, W. Zhou, M. Zhang, Q. Zhang, R. Jia and J. Zhao, *Chem. Commun.*, 2020, **56**, 12250–12253.
- S22. J. Hu, Y. Zhao, J. Liu, Y. Zhang and Z. Shi, *Angew. Chem. Int. Ed.*, 2016, **55**, 8718–8722.
- S23. T. E. Pennington, C. Kardiman and C. A. Hutton, *Tetrahedron Lett.*, 2004, **45**, 6657–6660.
- S24. S. Liu, X. Zeng, G. B. Hammond and B. Xu, *Adv. Synth. Catal.*, 2018, **360**, 3667–3671.

## 12. $^1\text{H}$ and $^{13}\text{C}$ NMR spectra

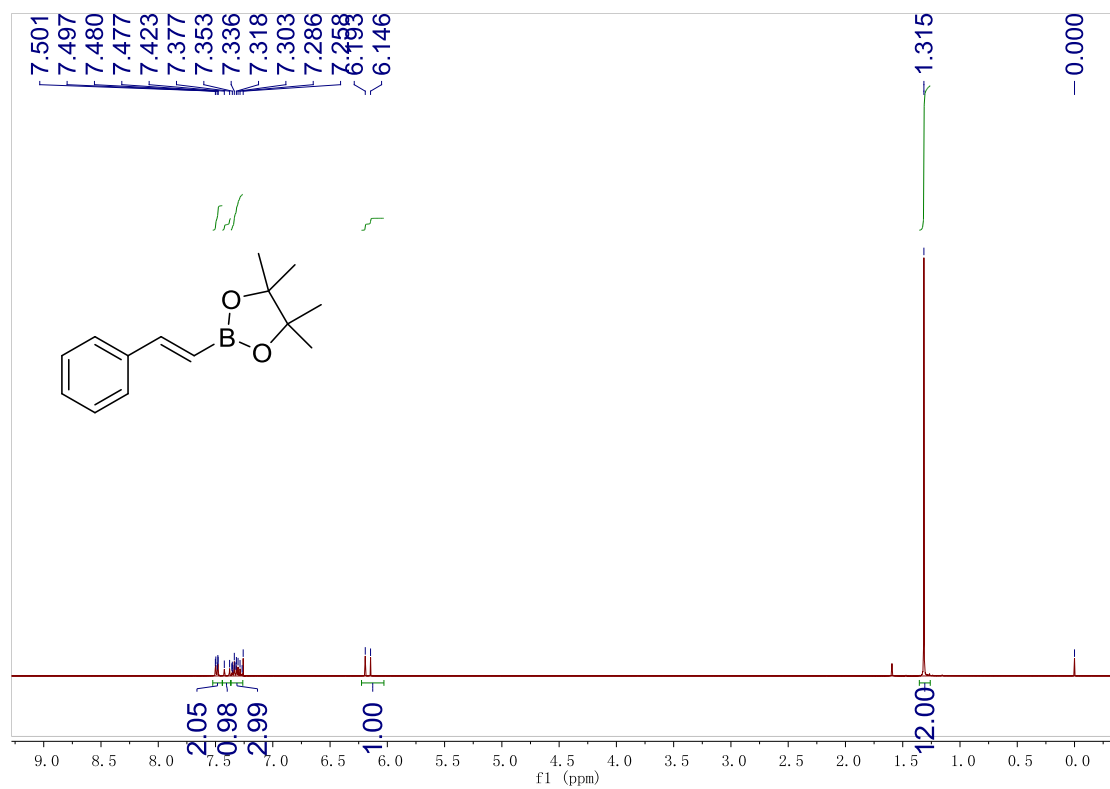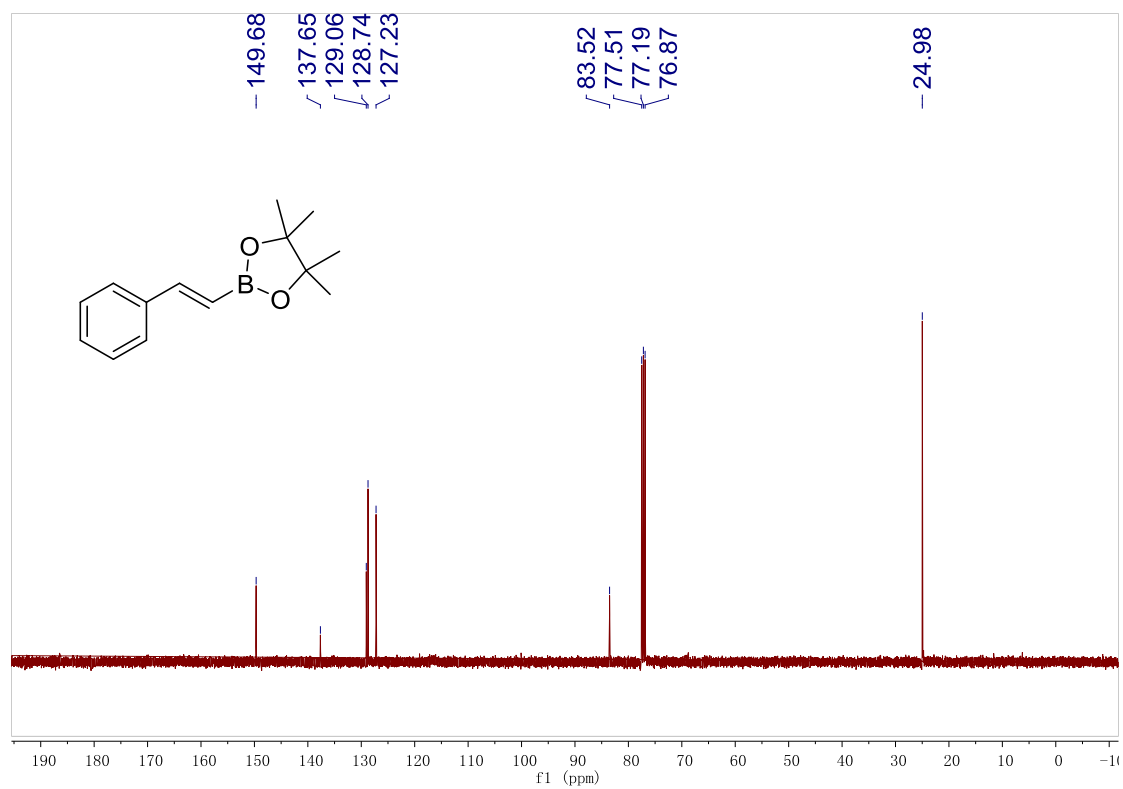

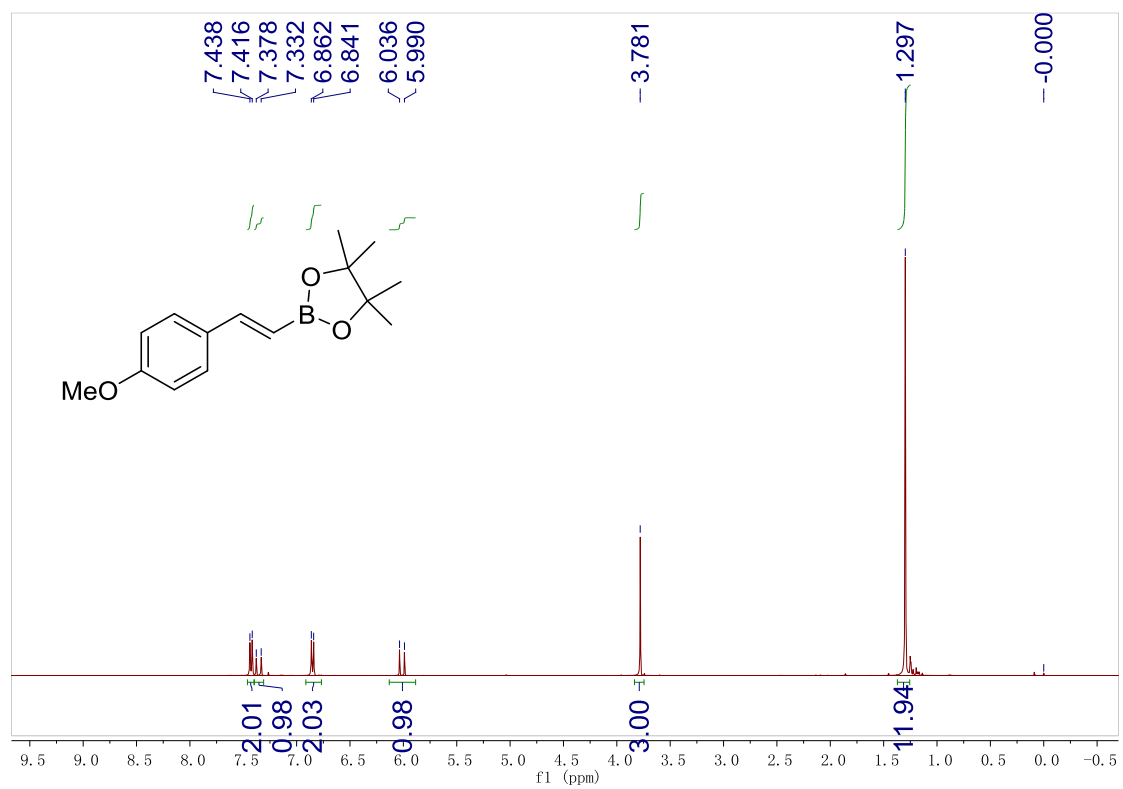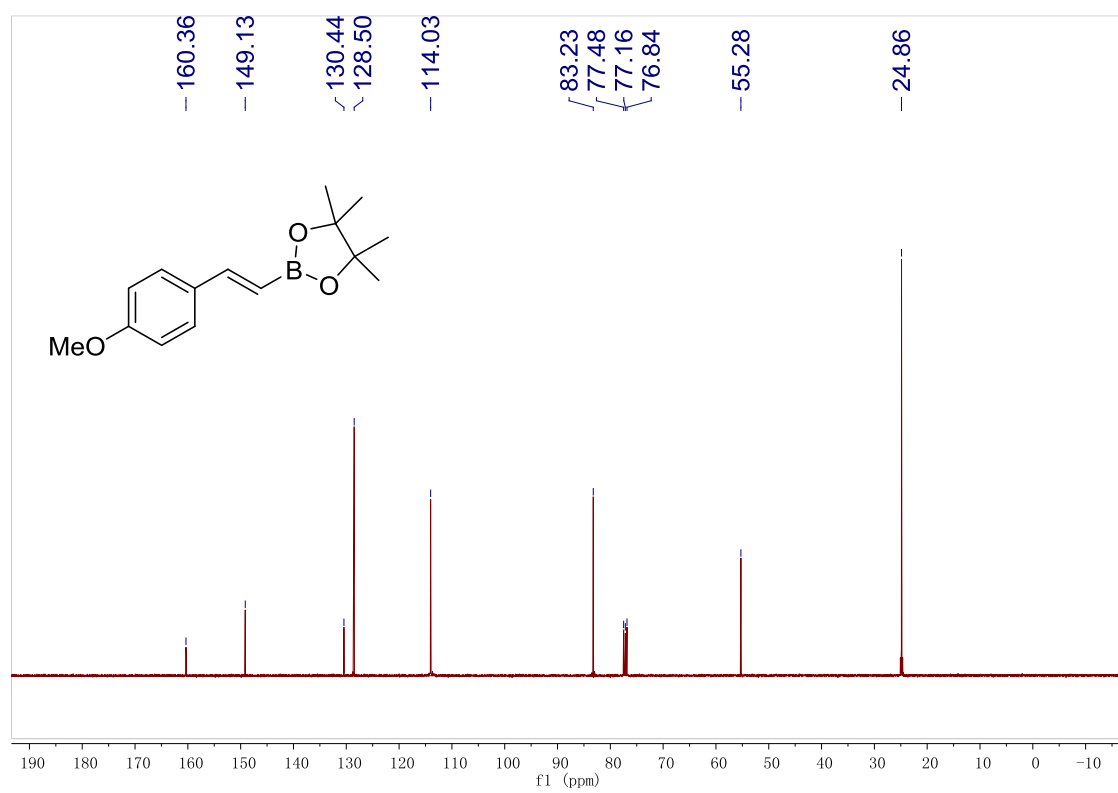

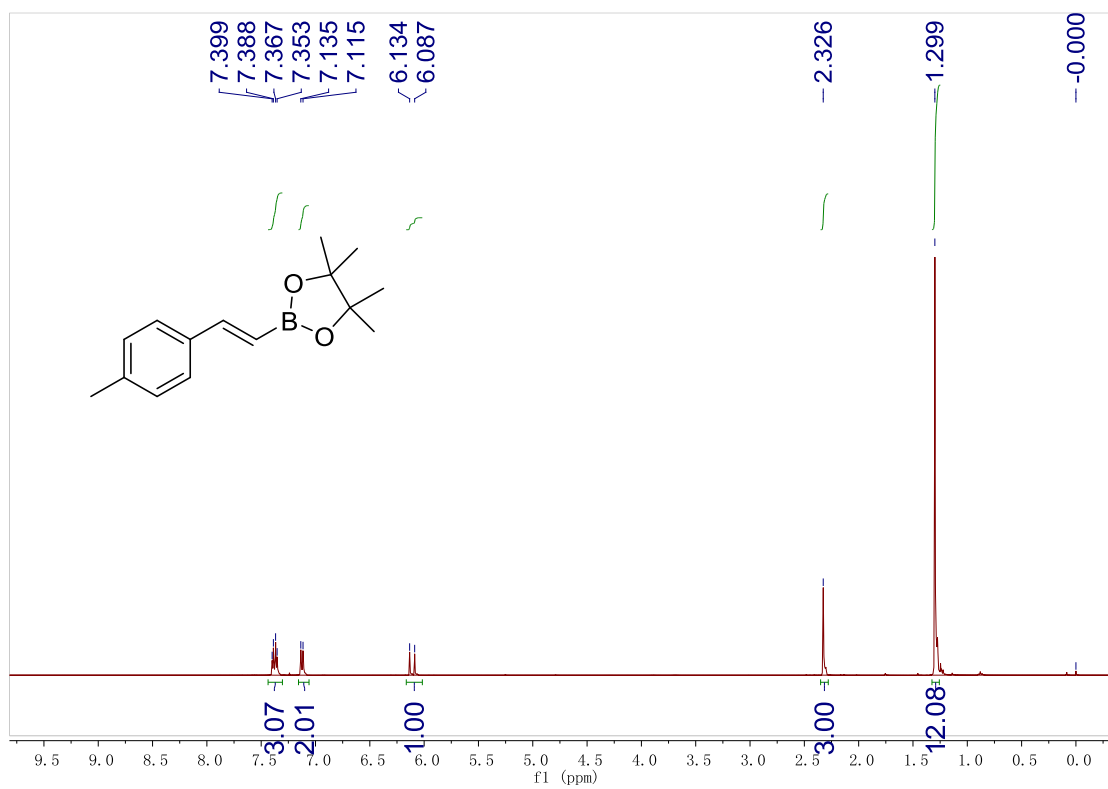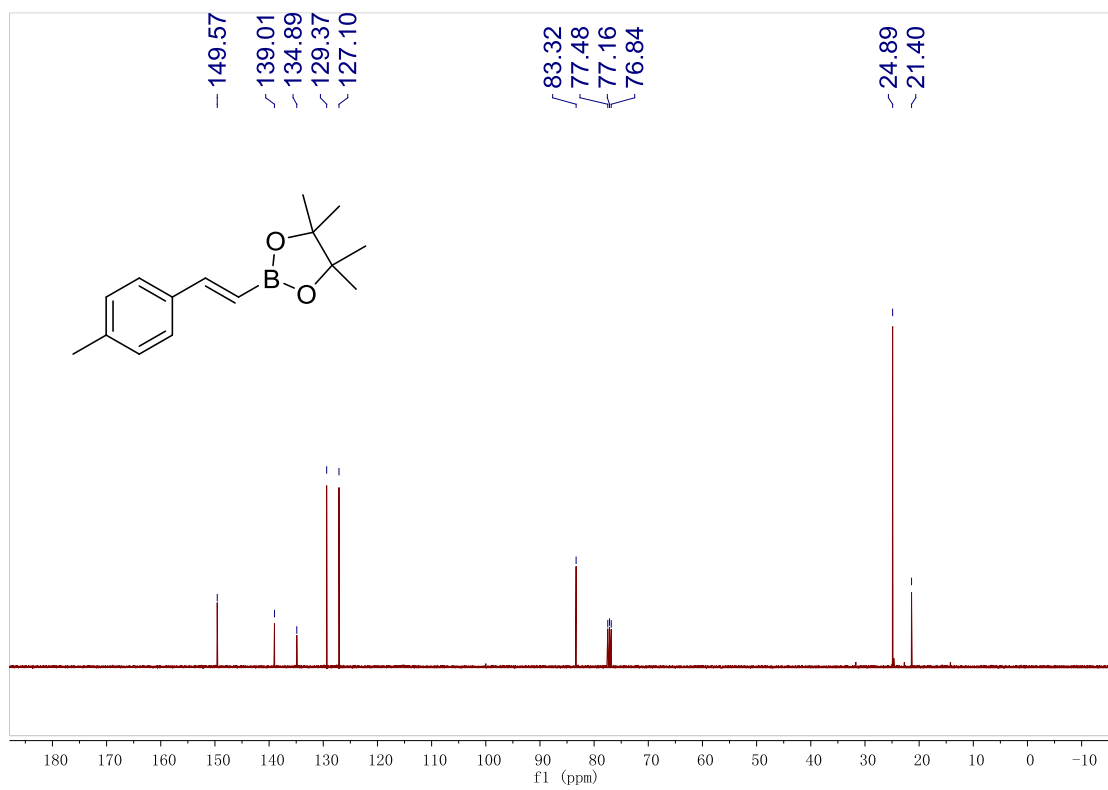

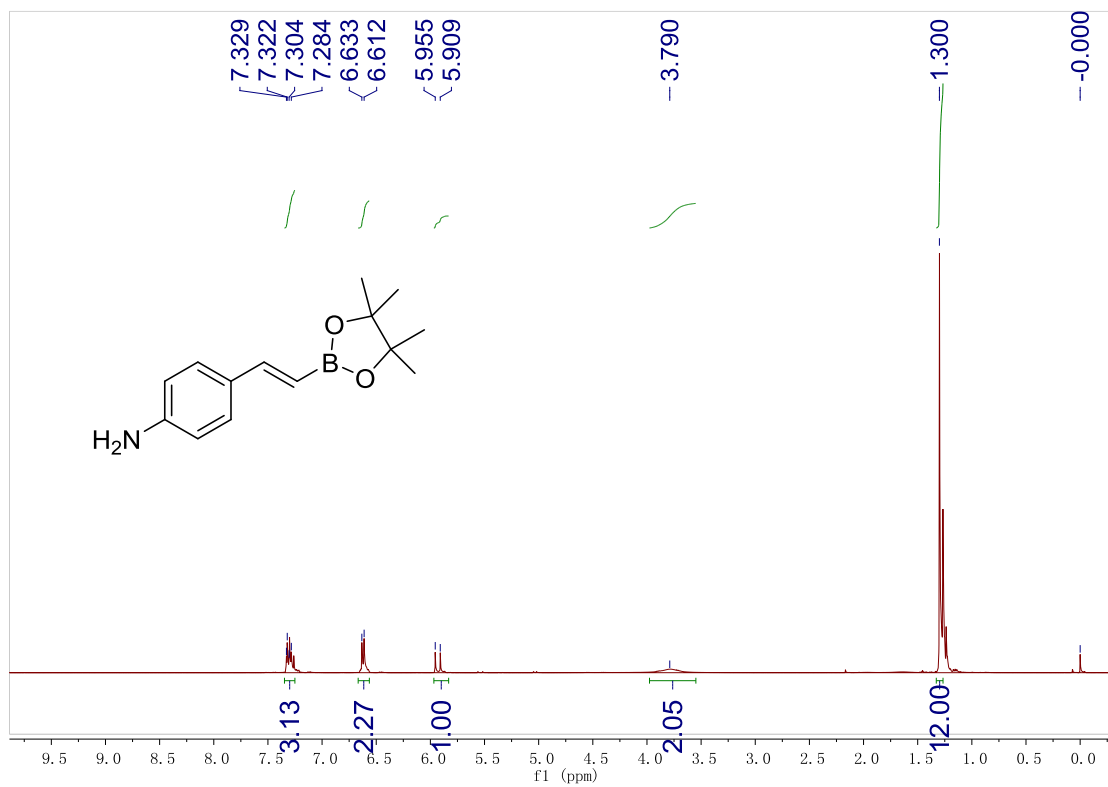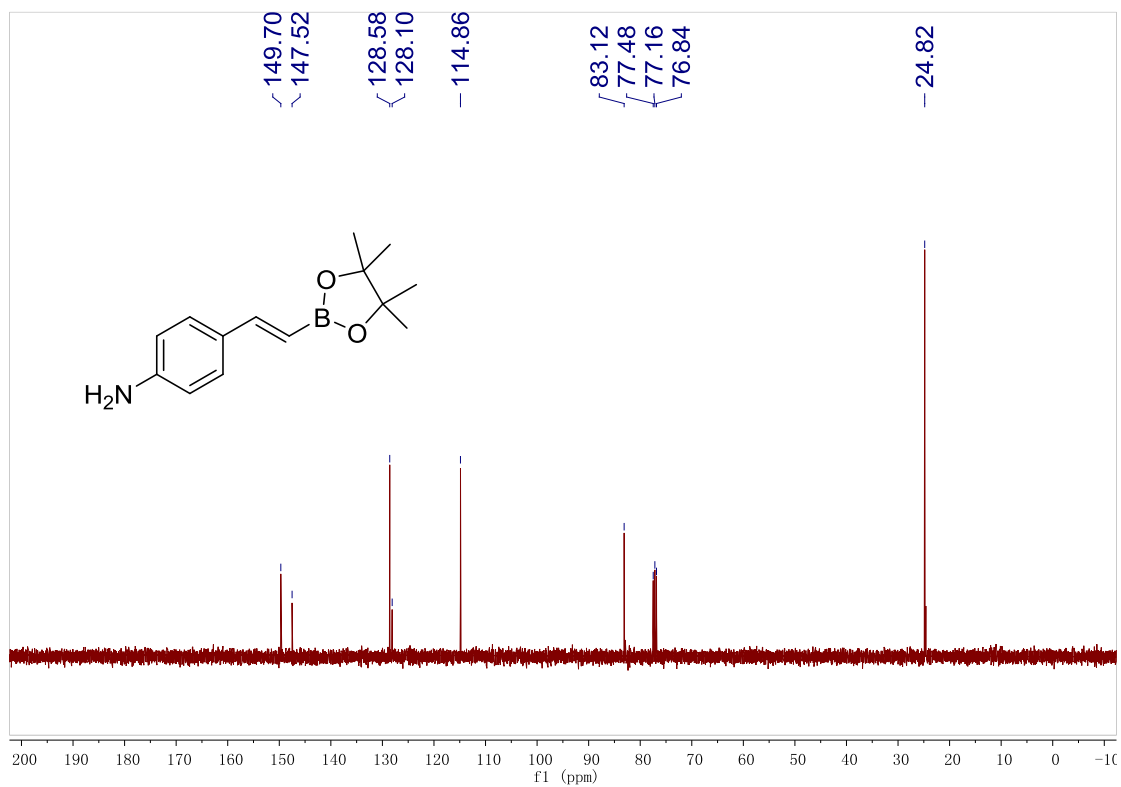

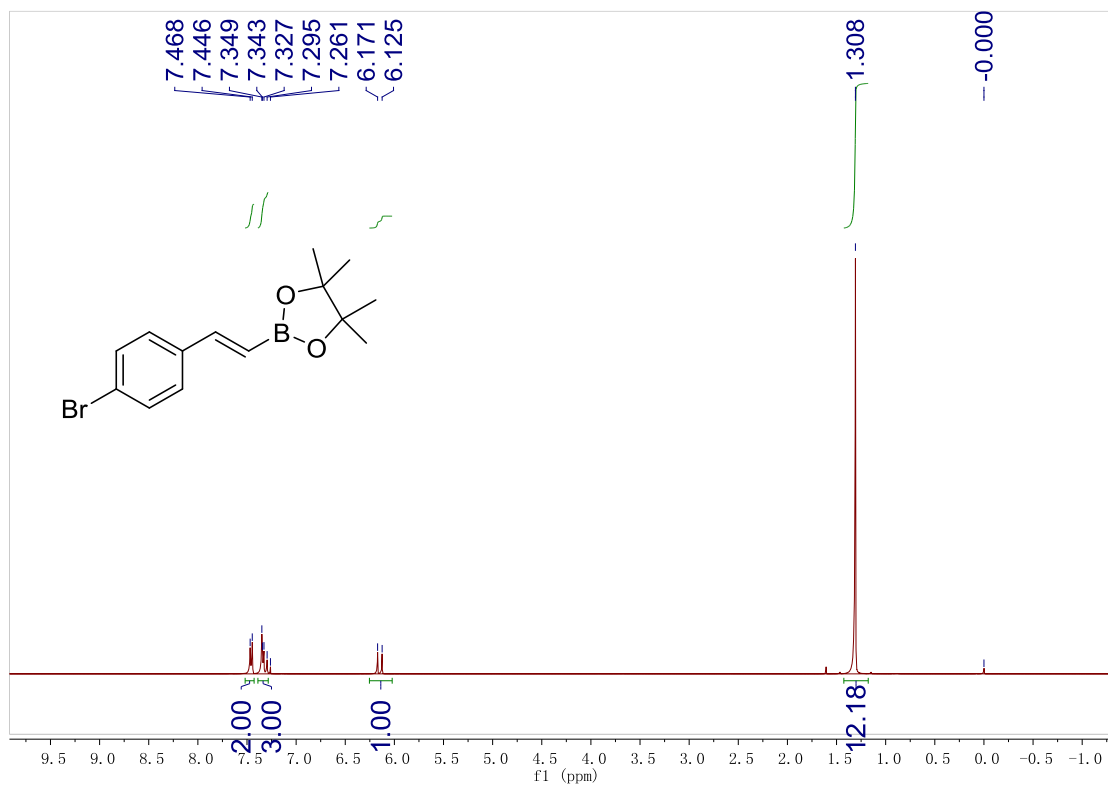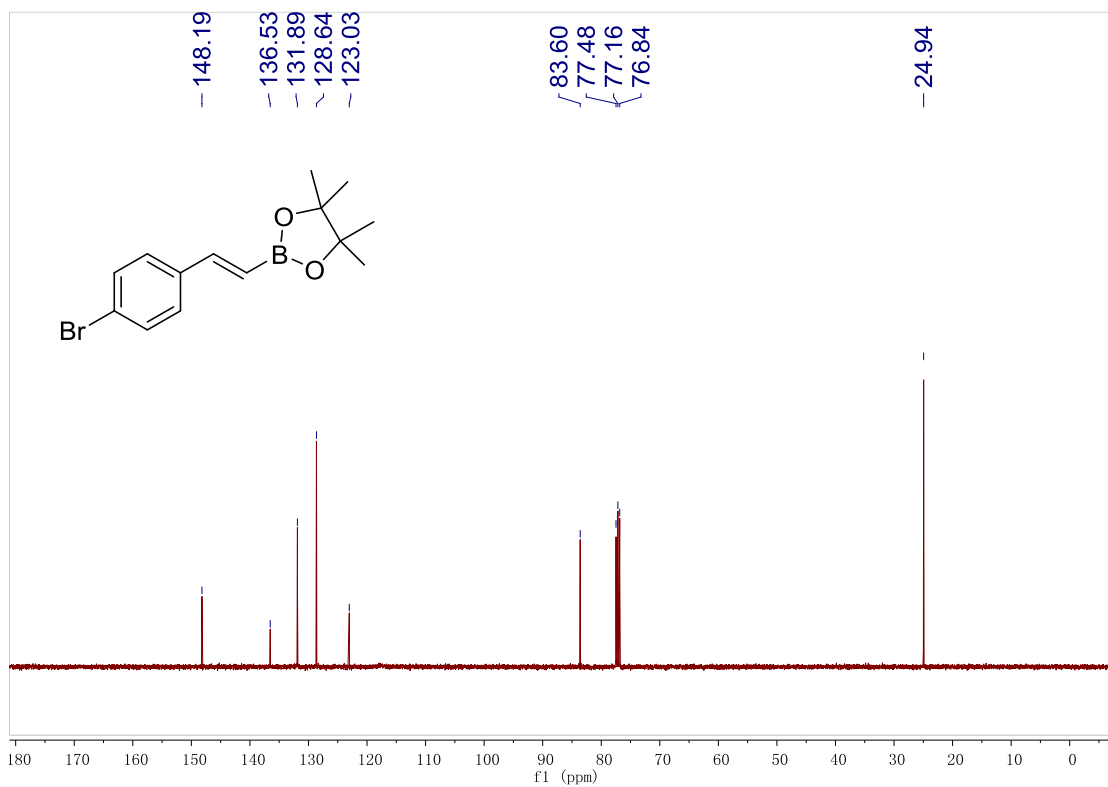



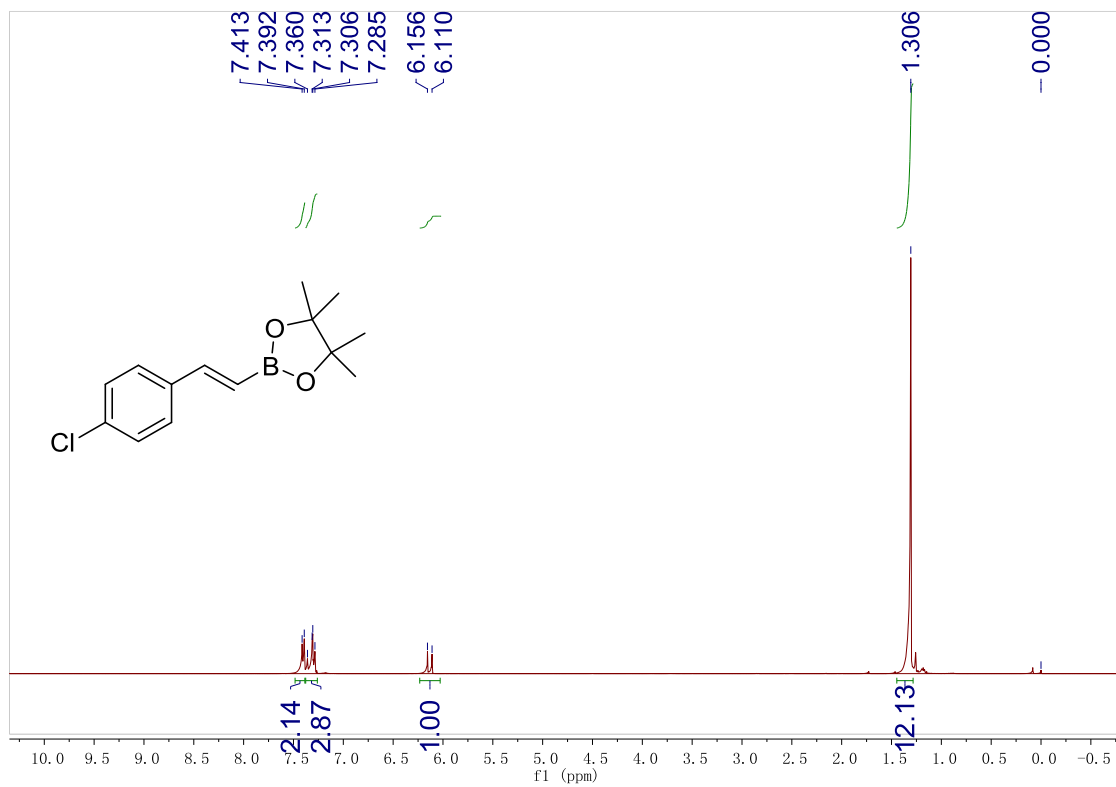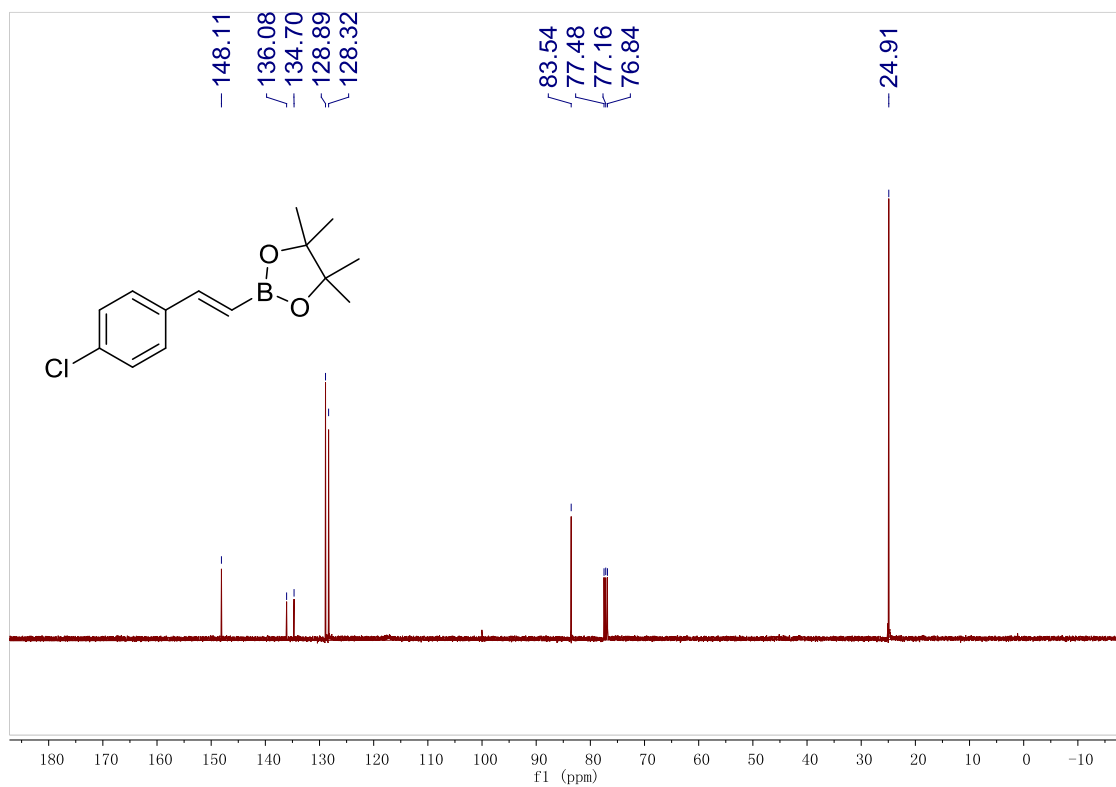

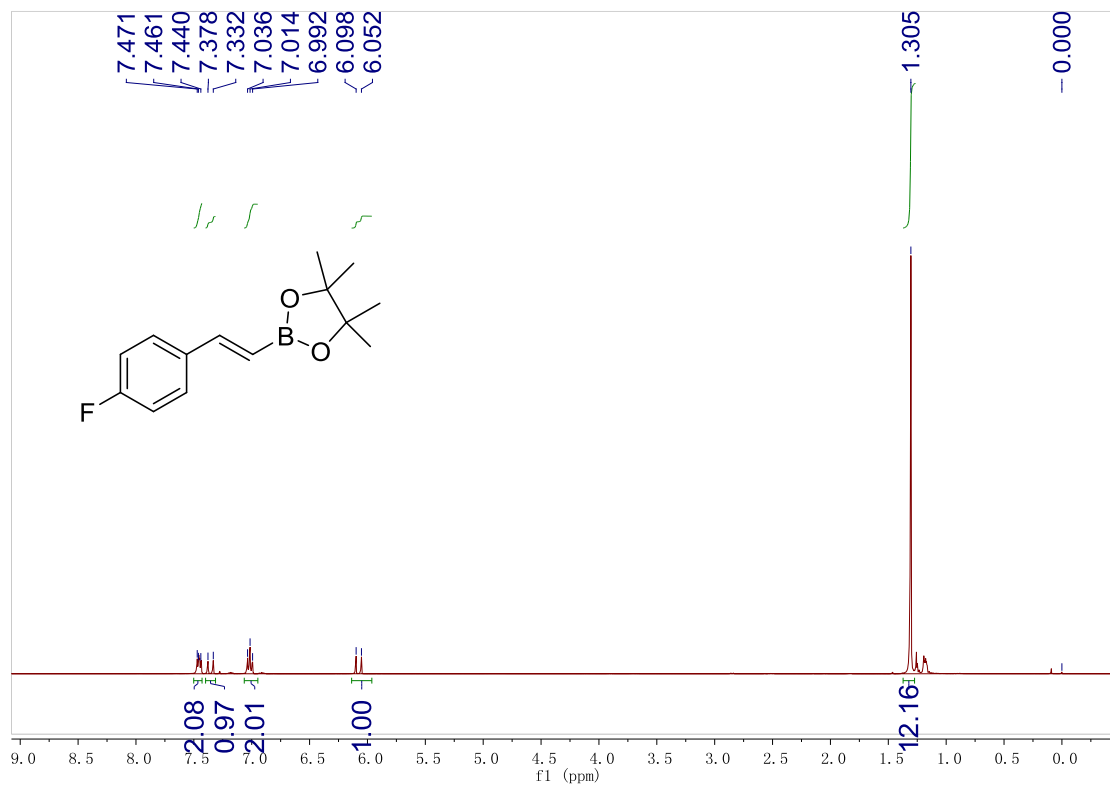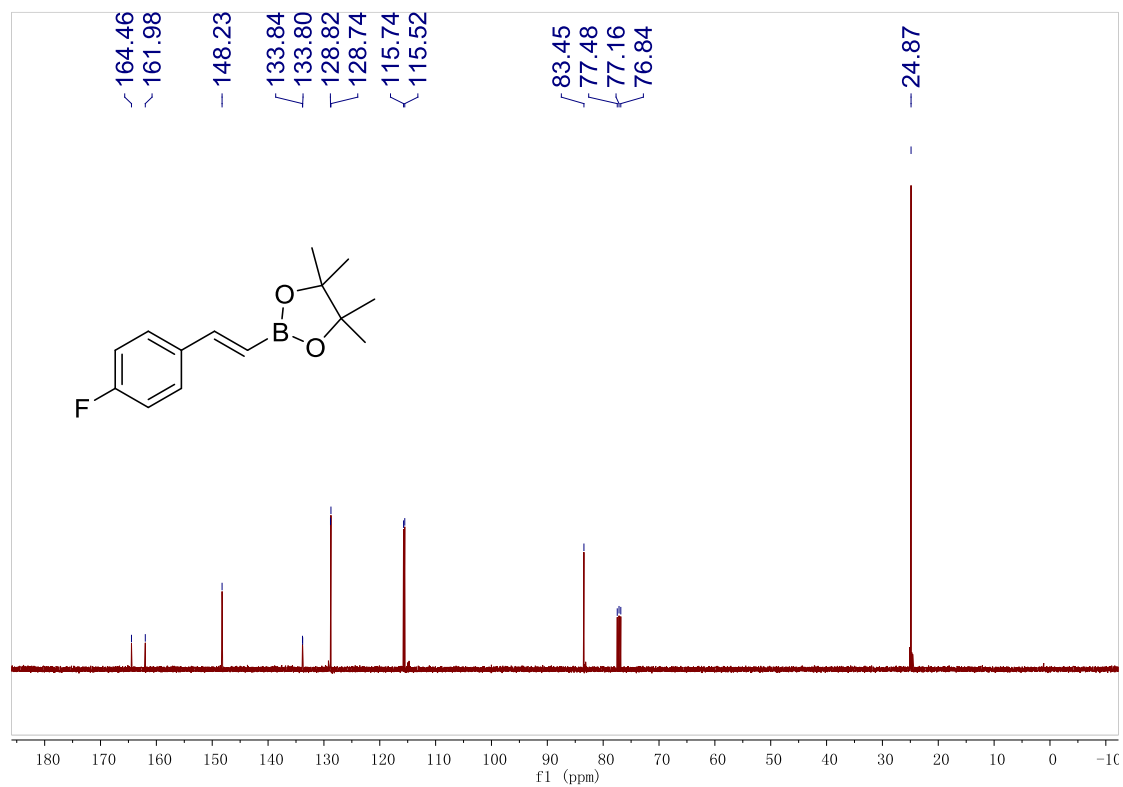

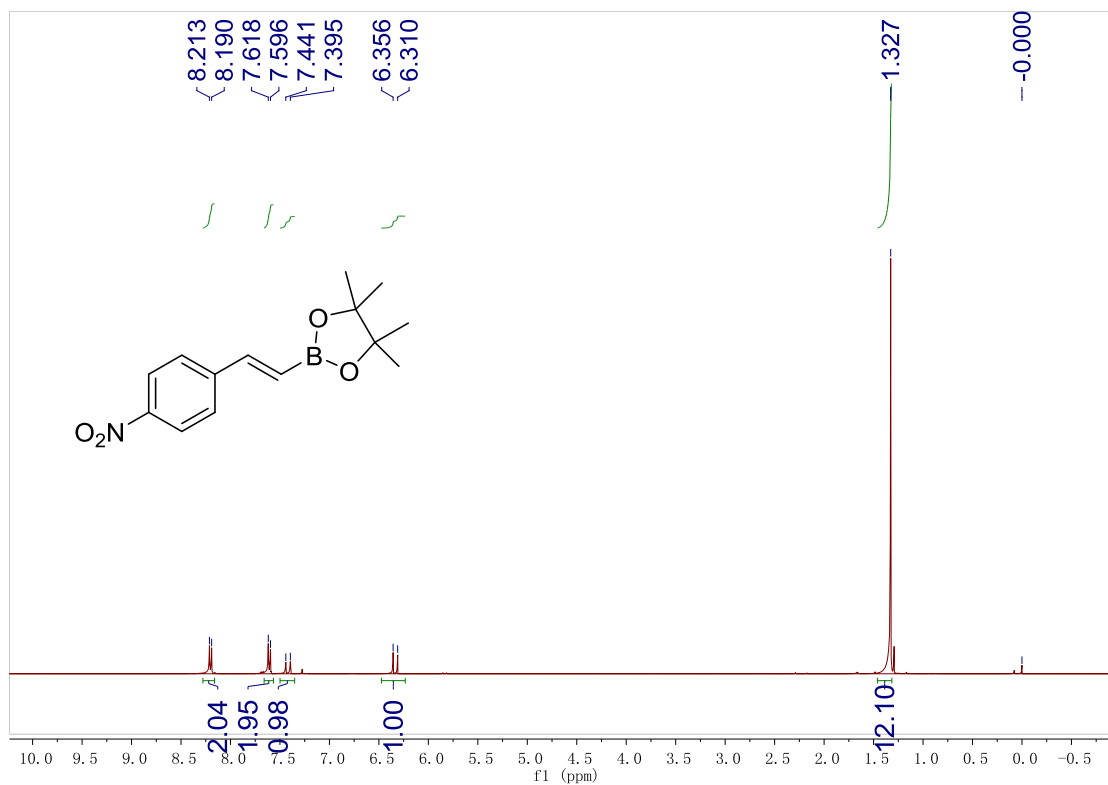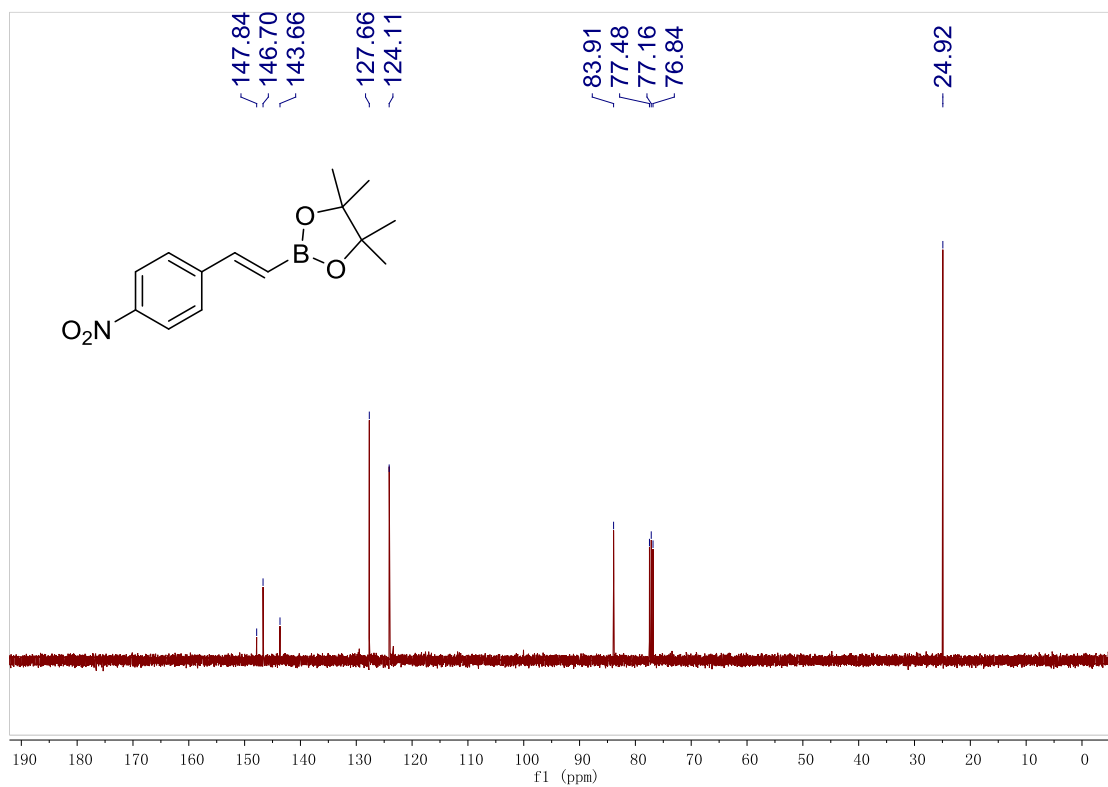

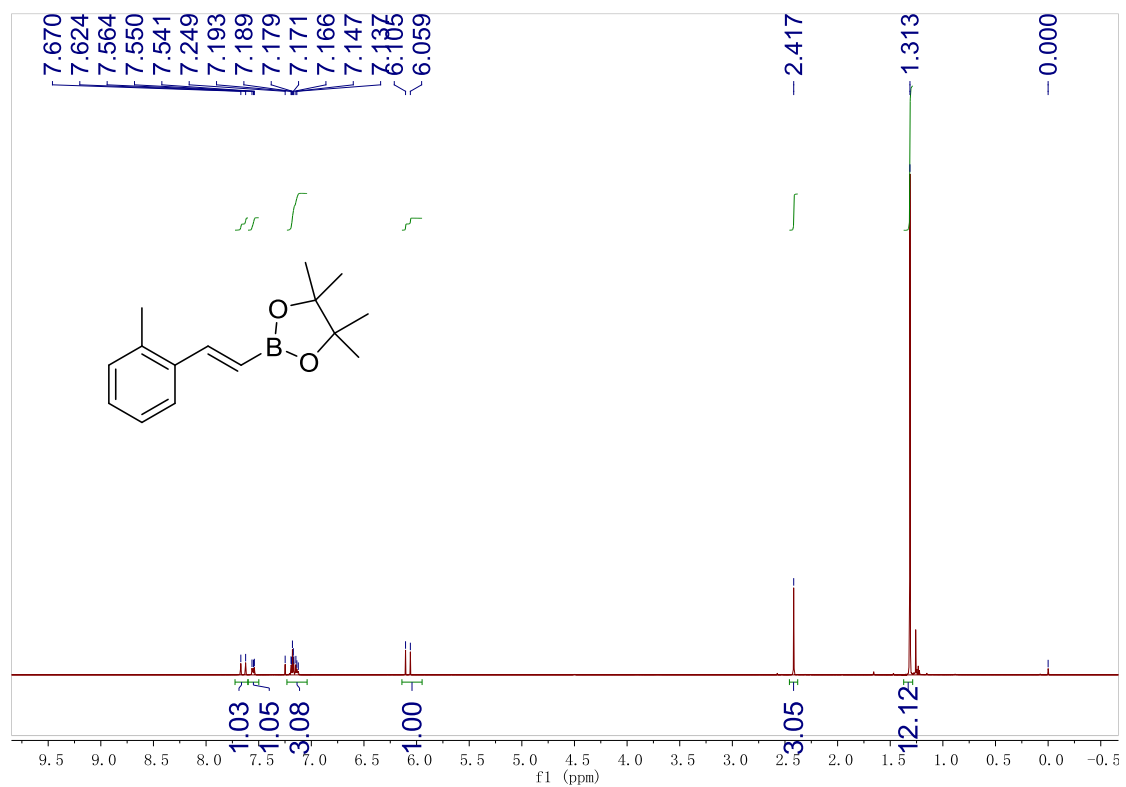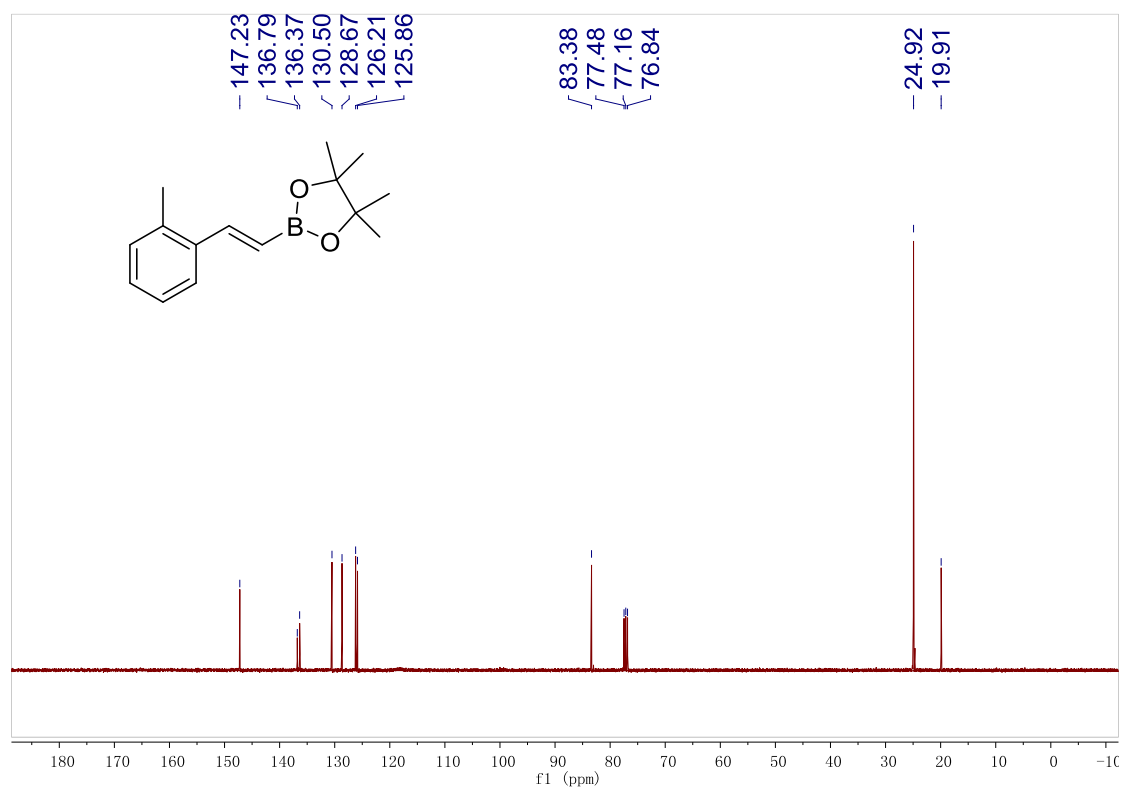

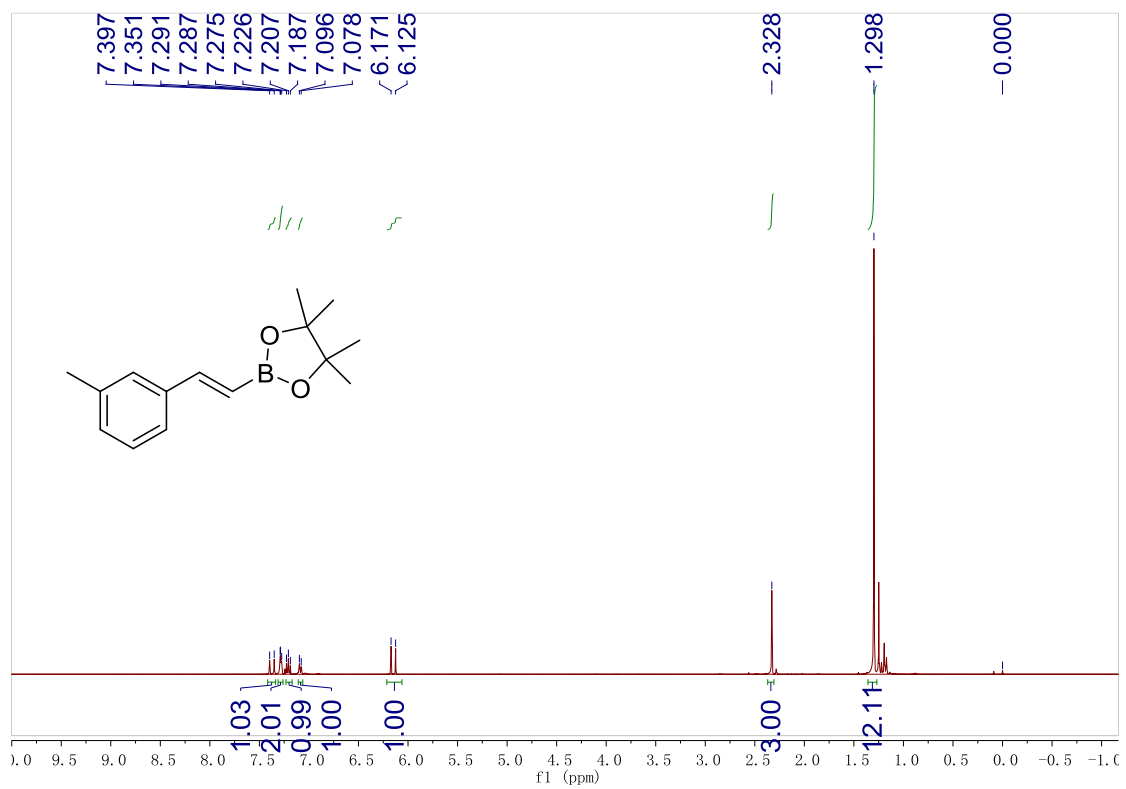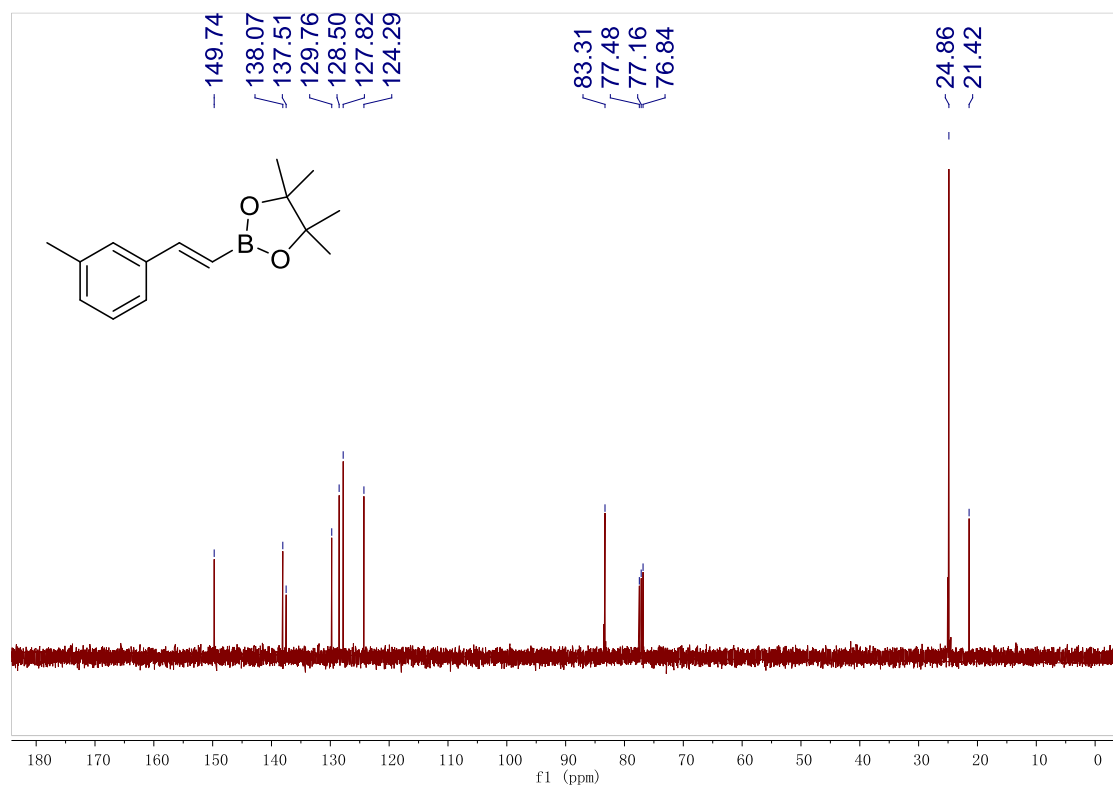

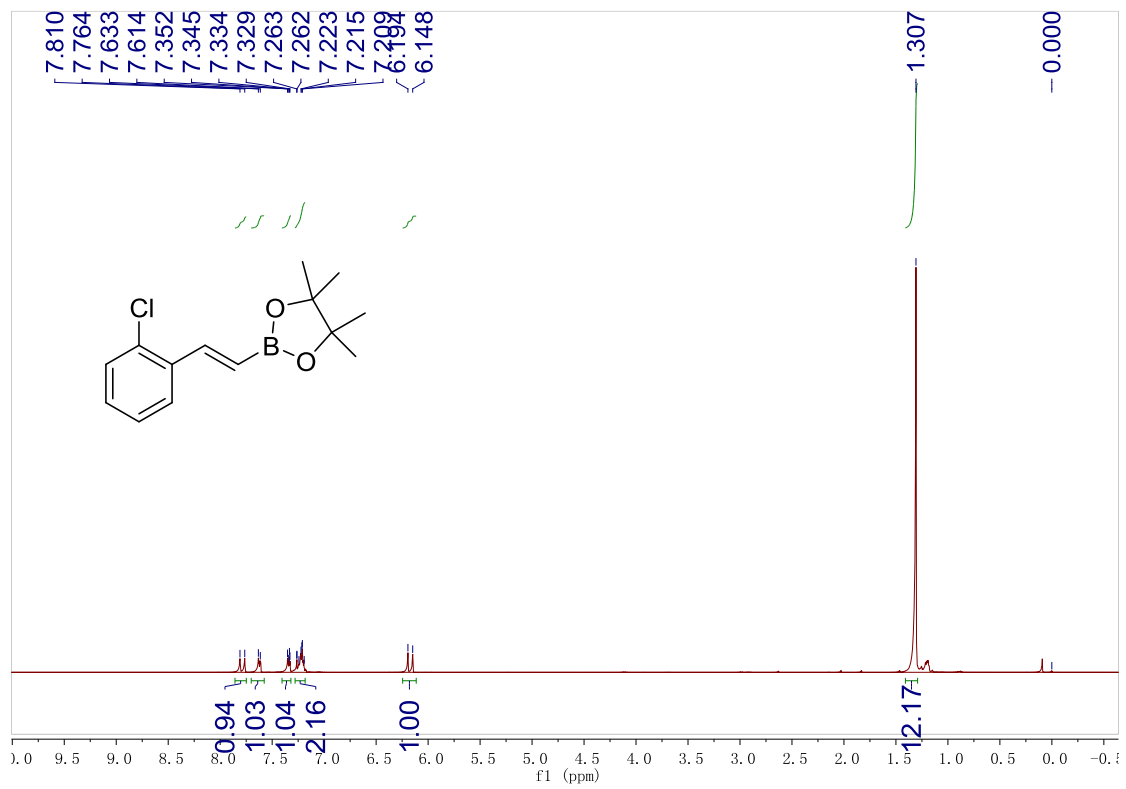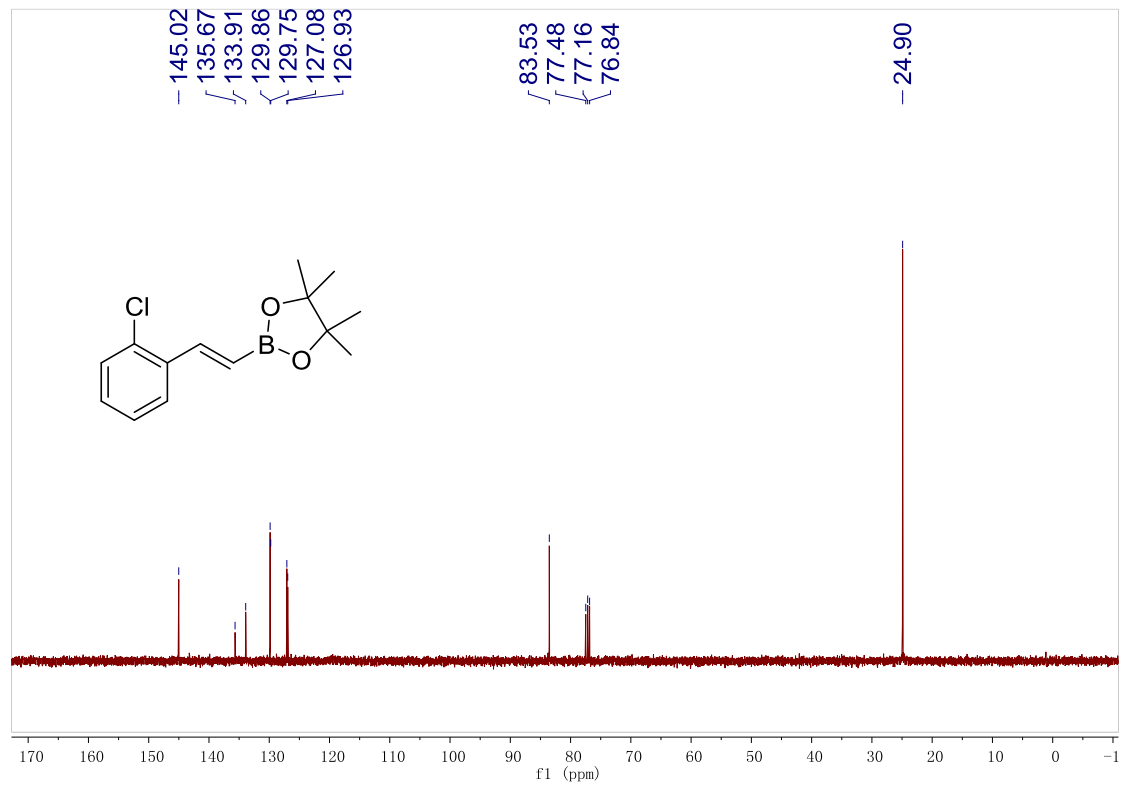

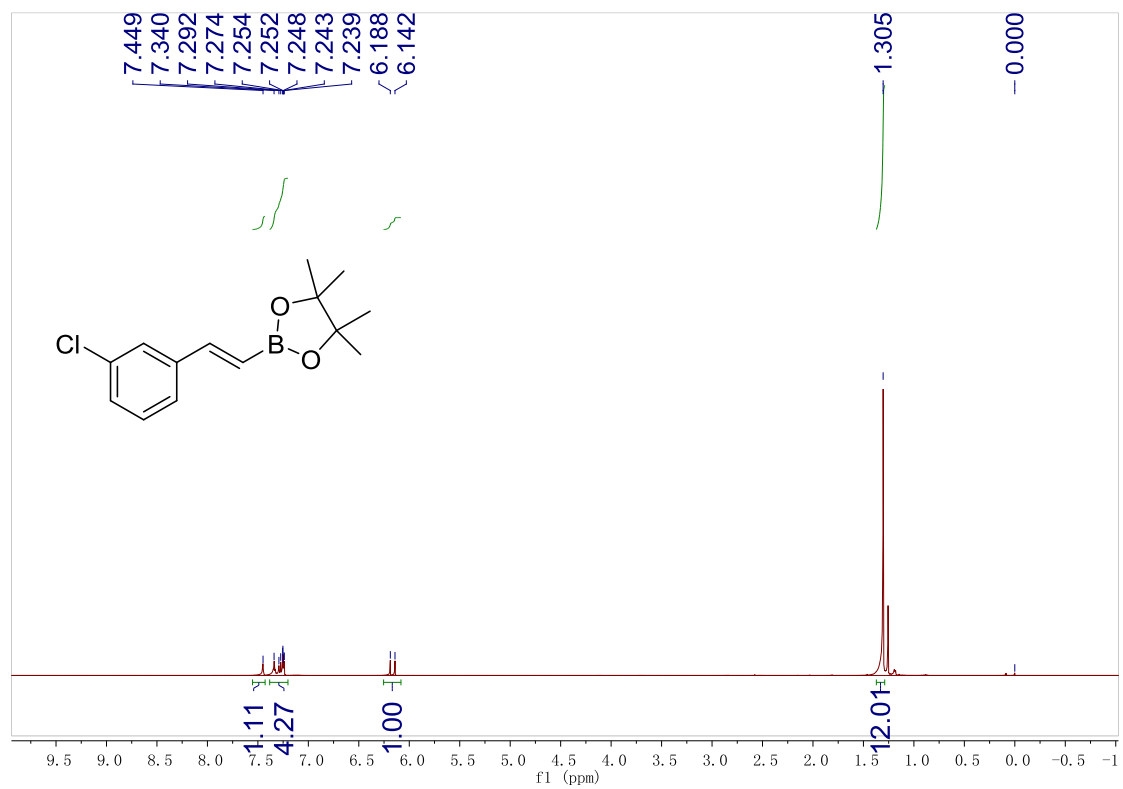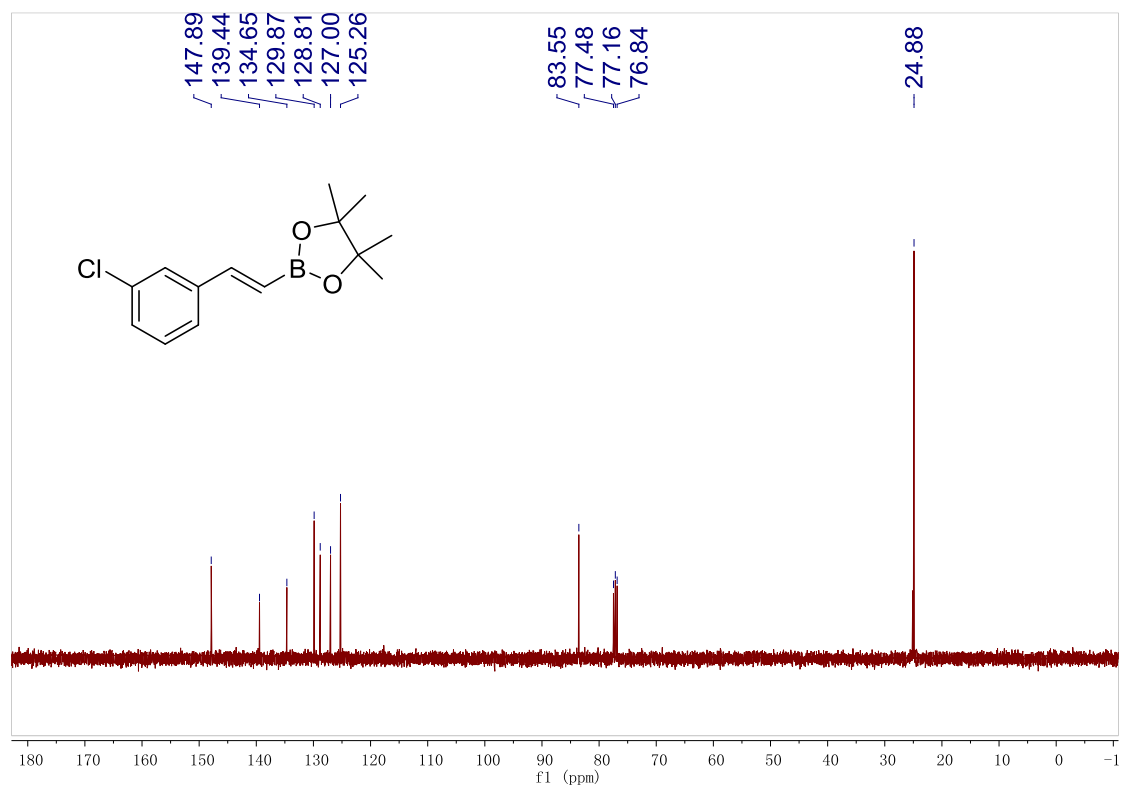

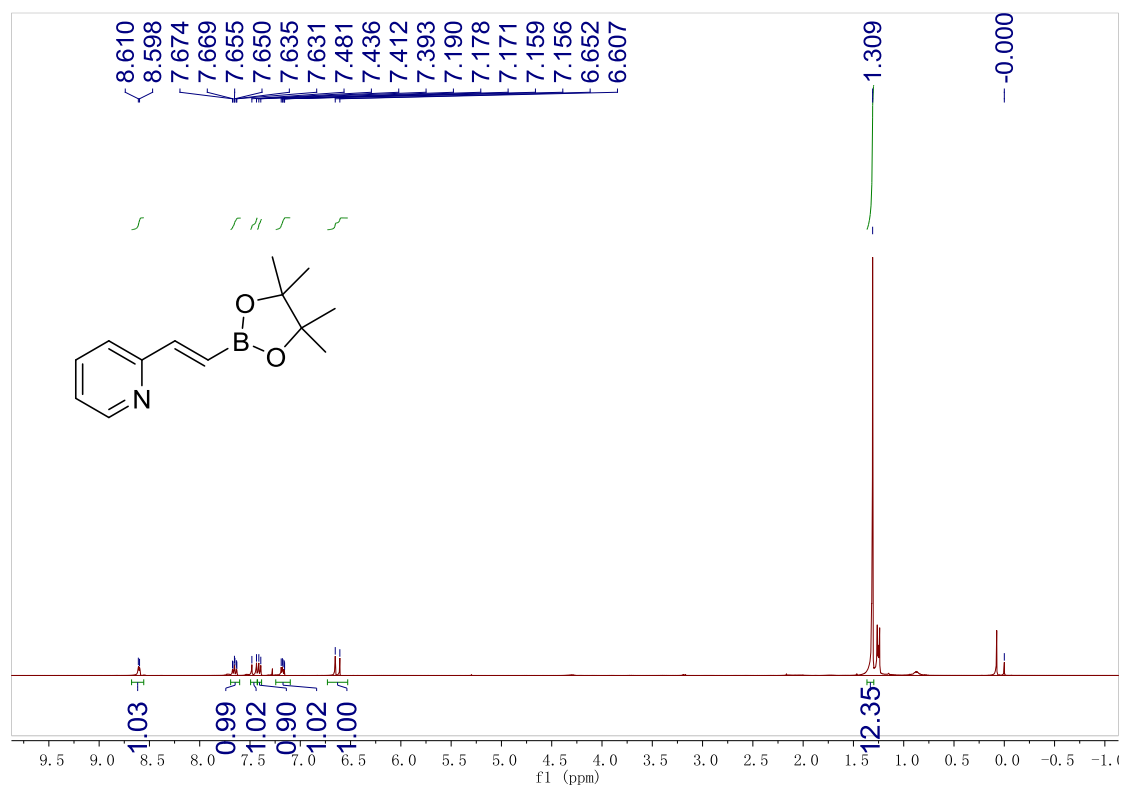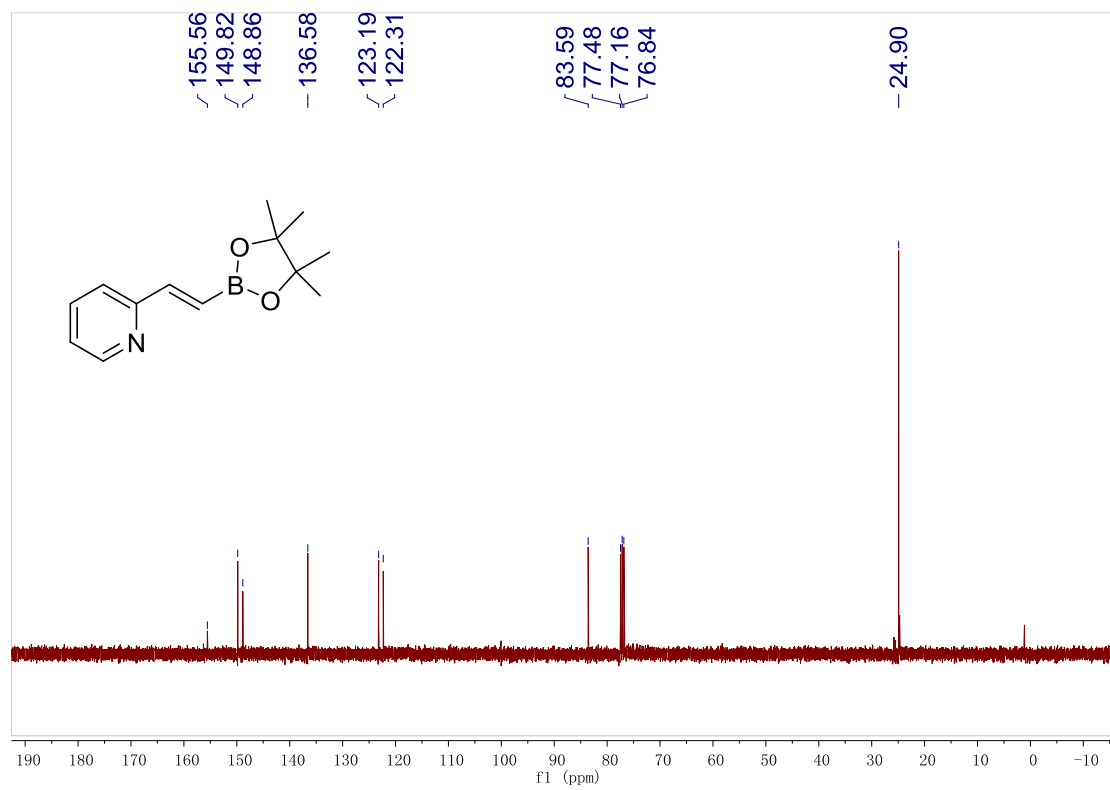



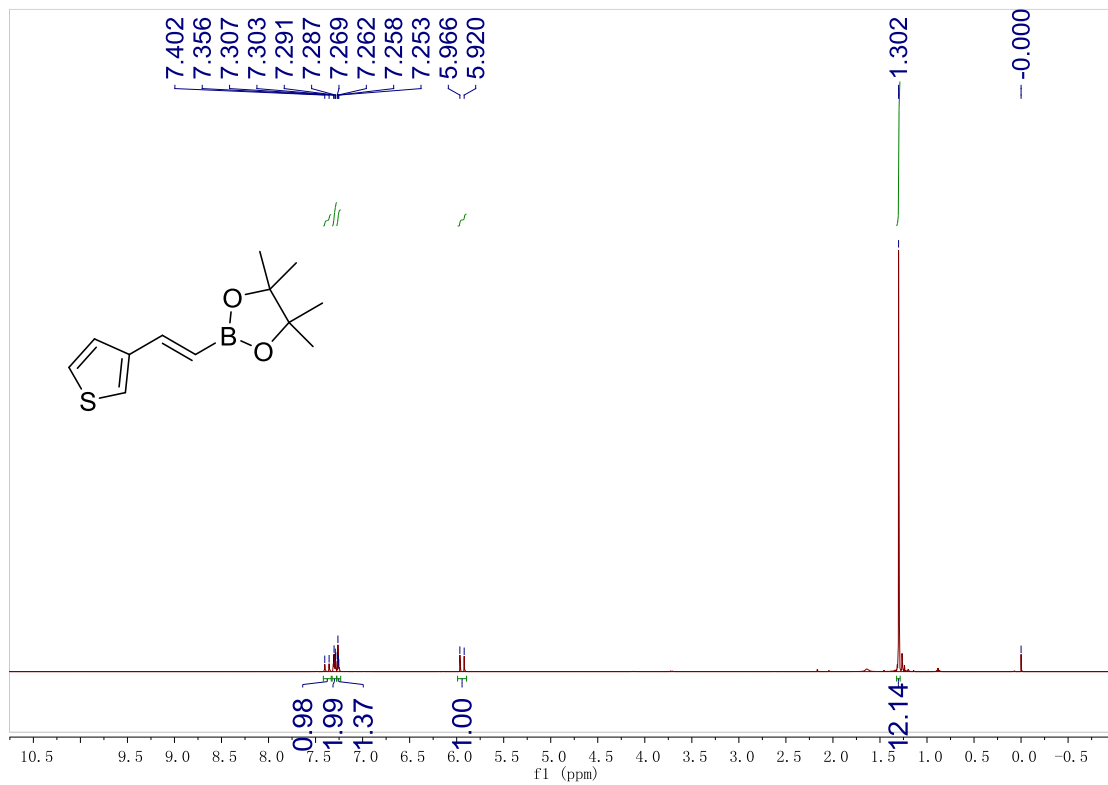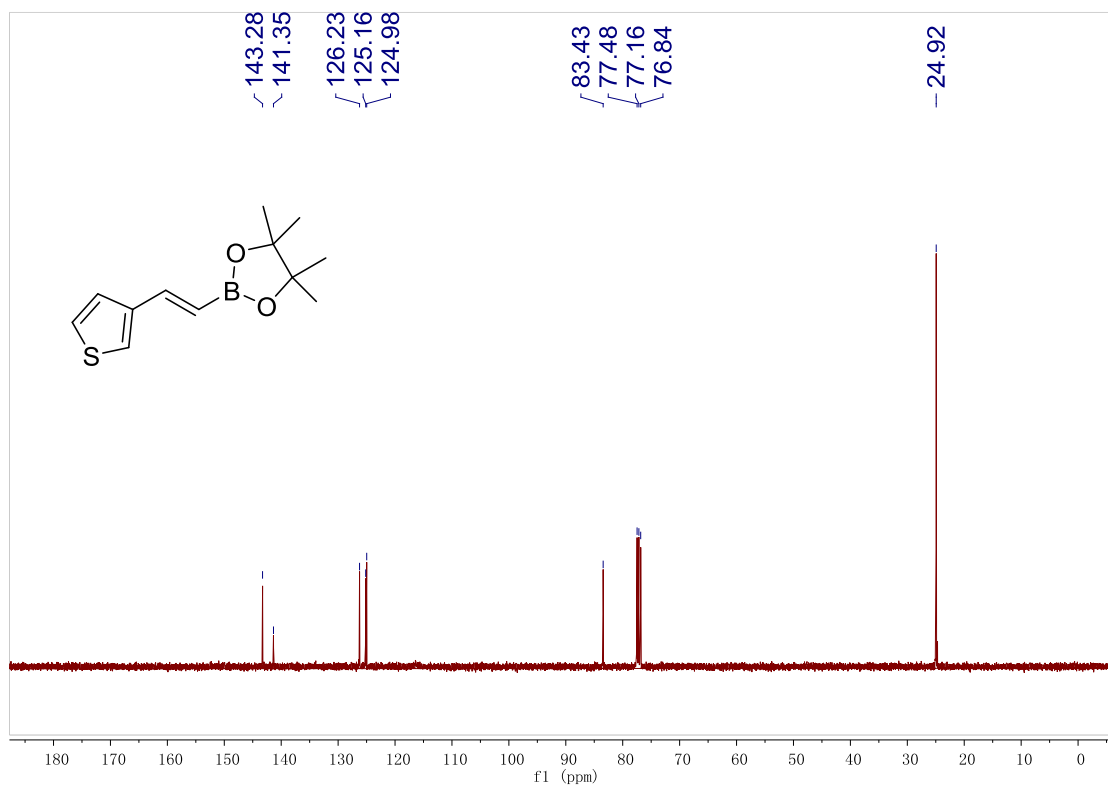

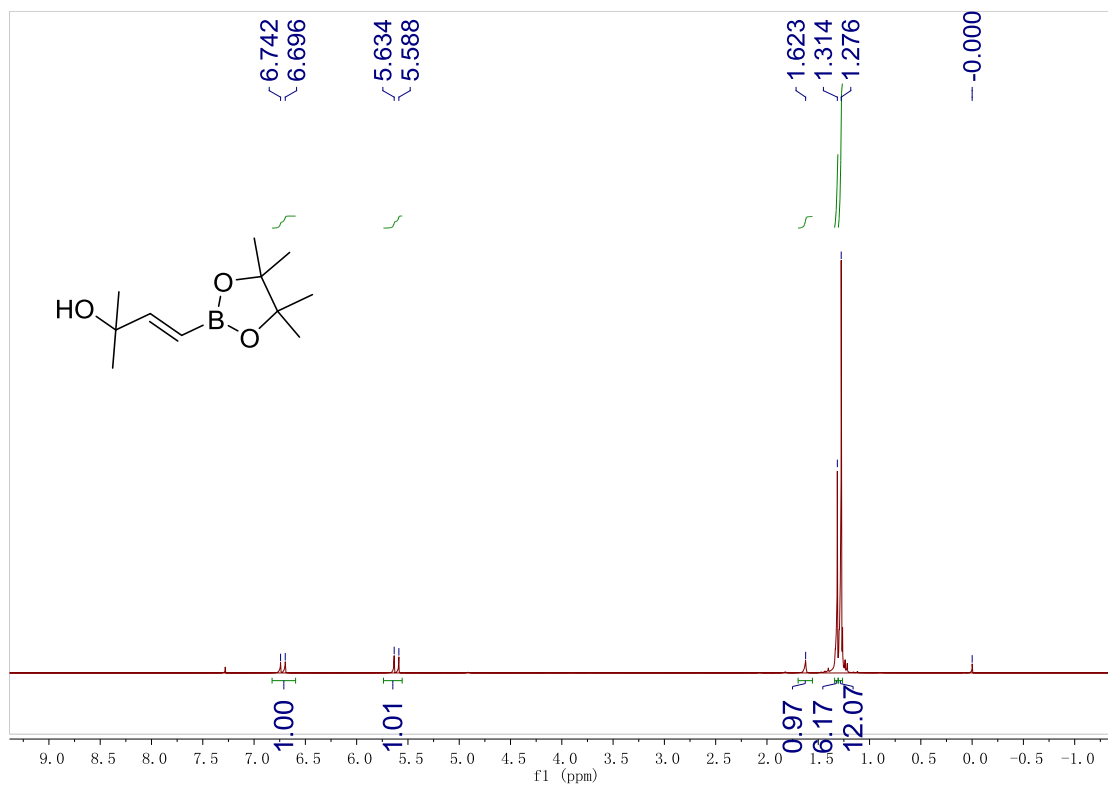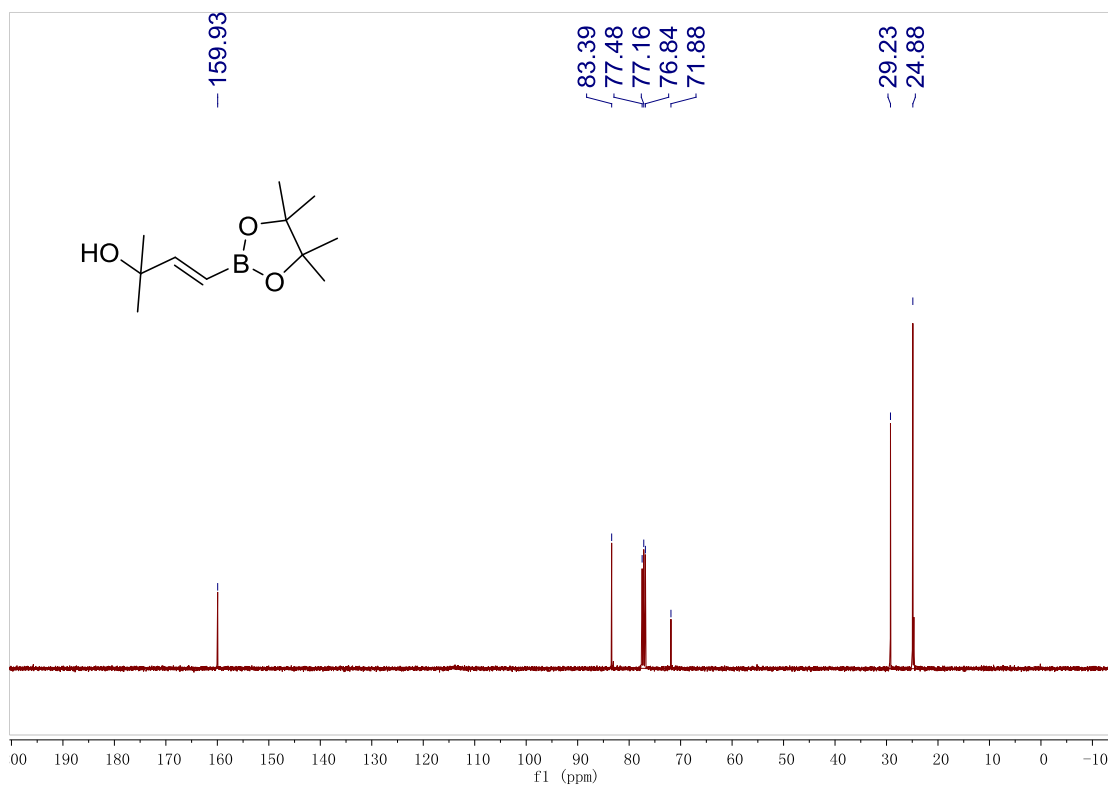

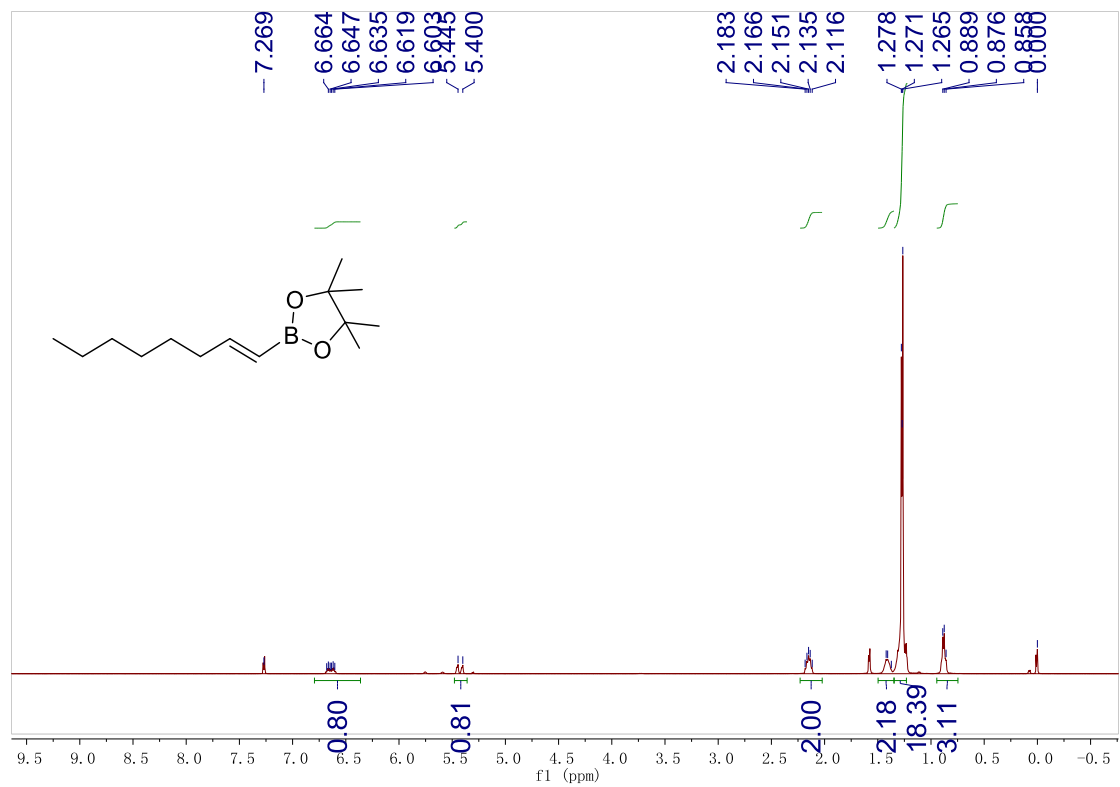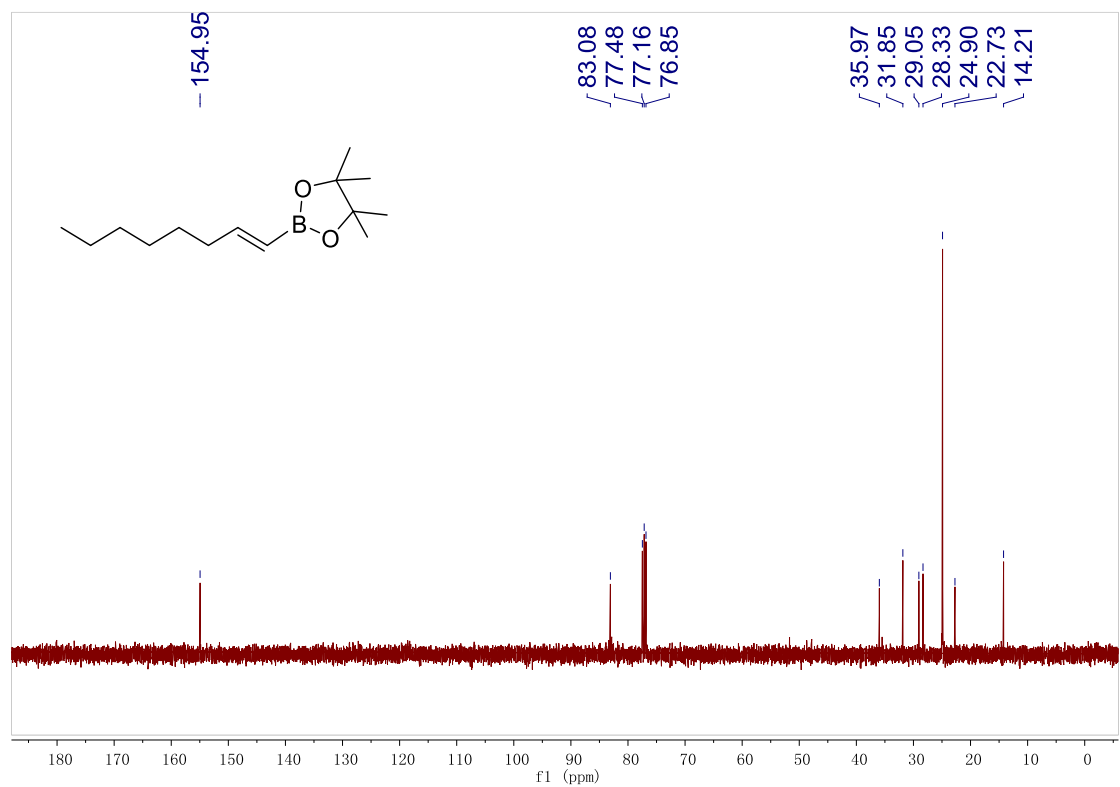

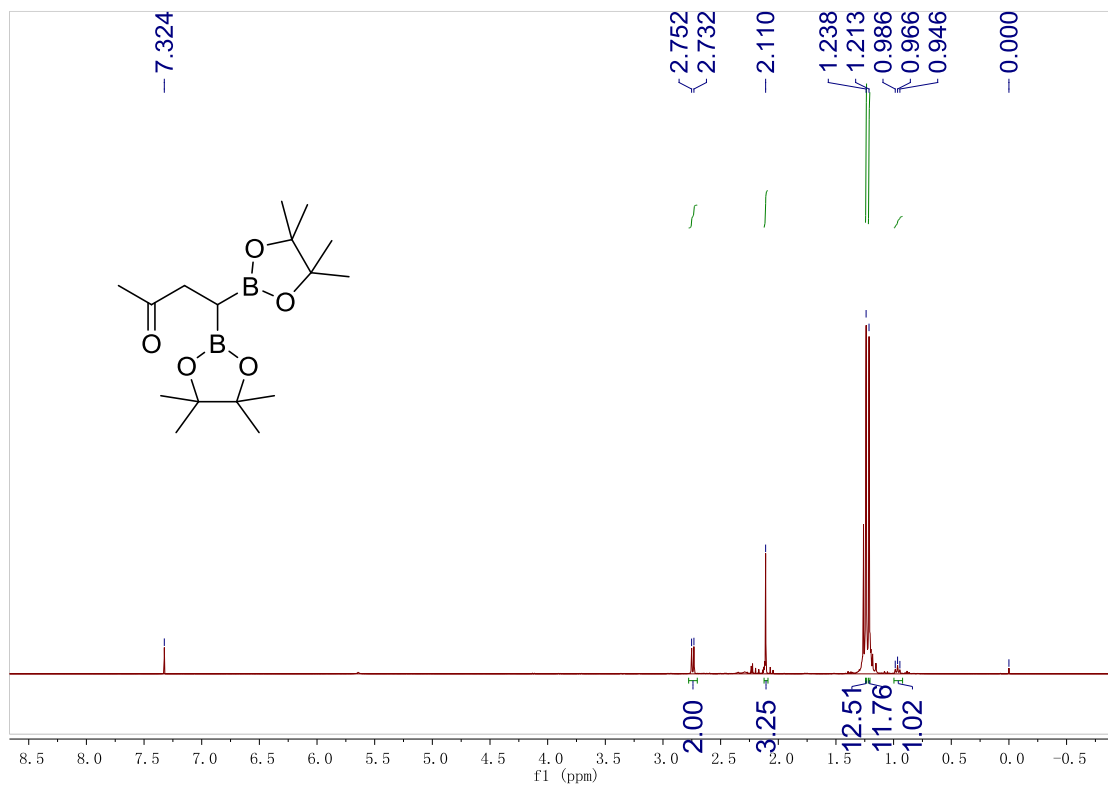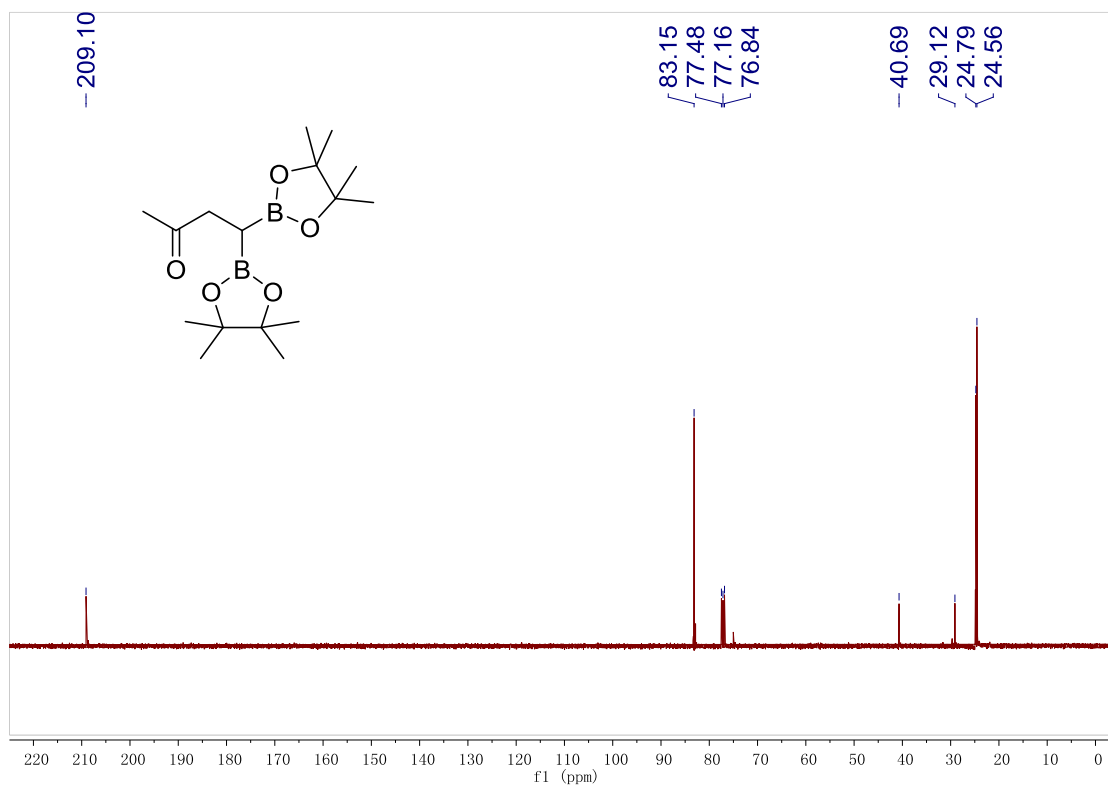

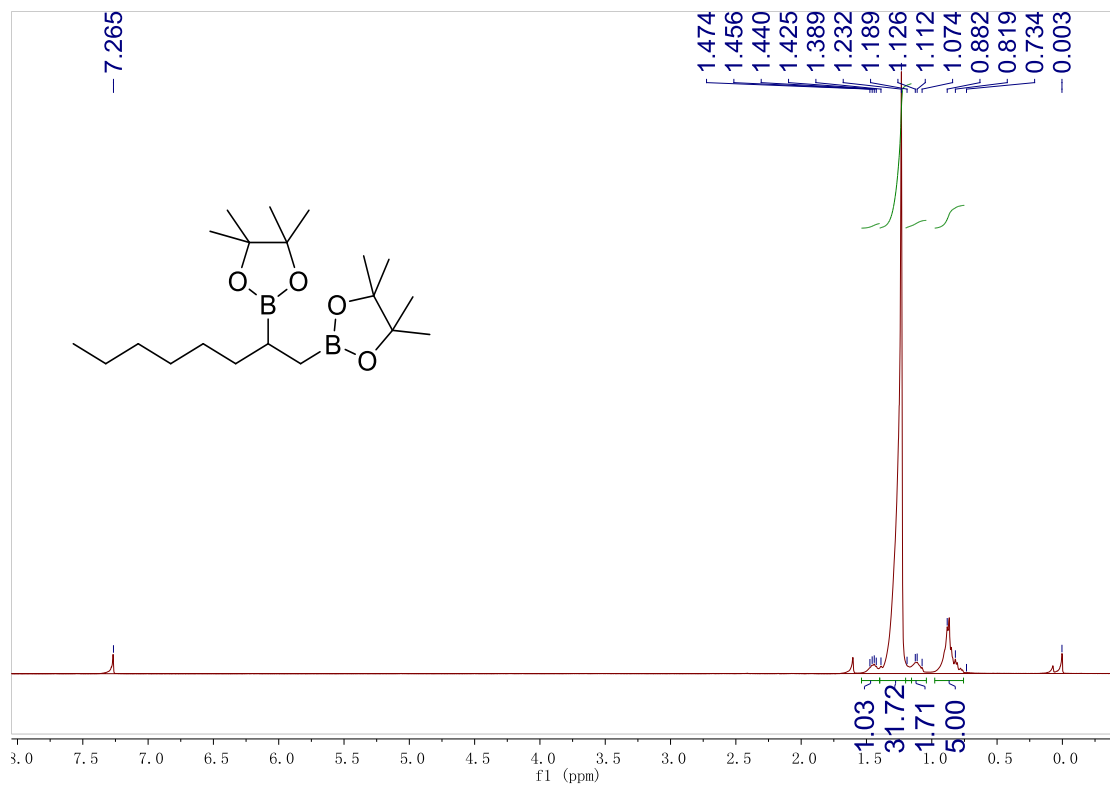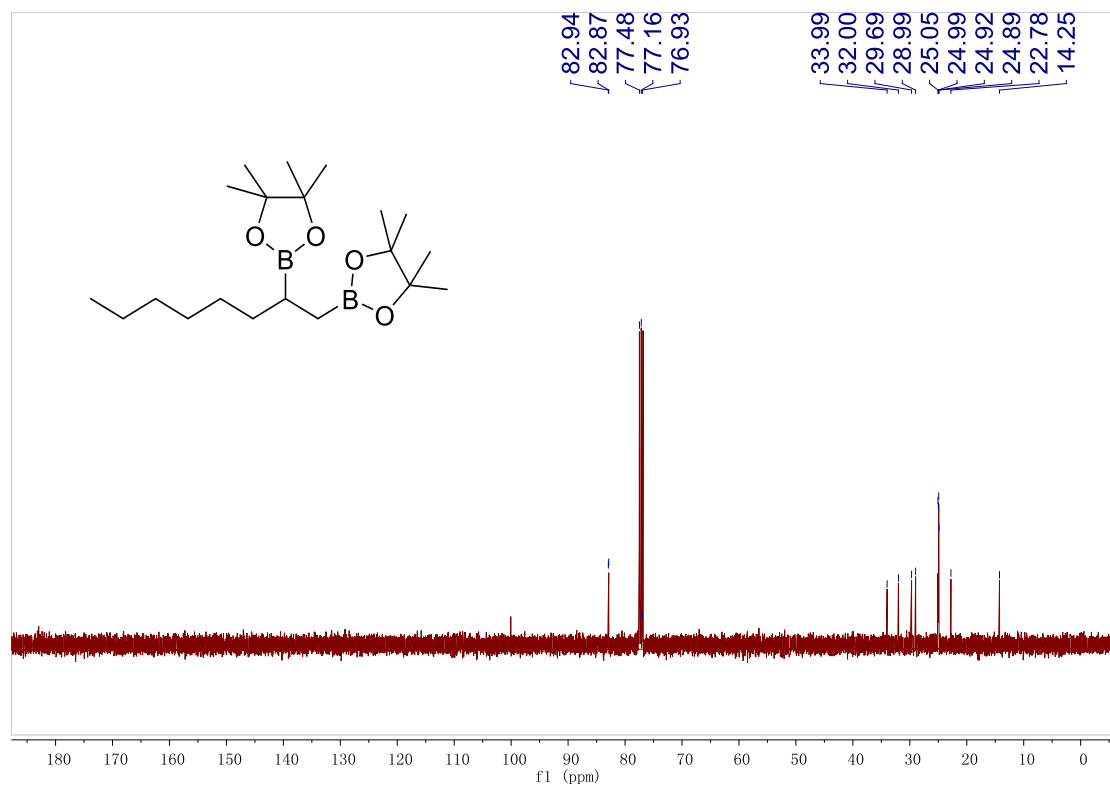

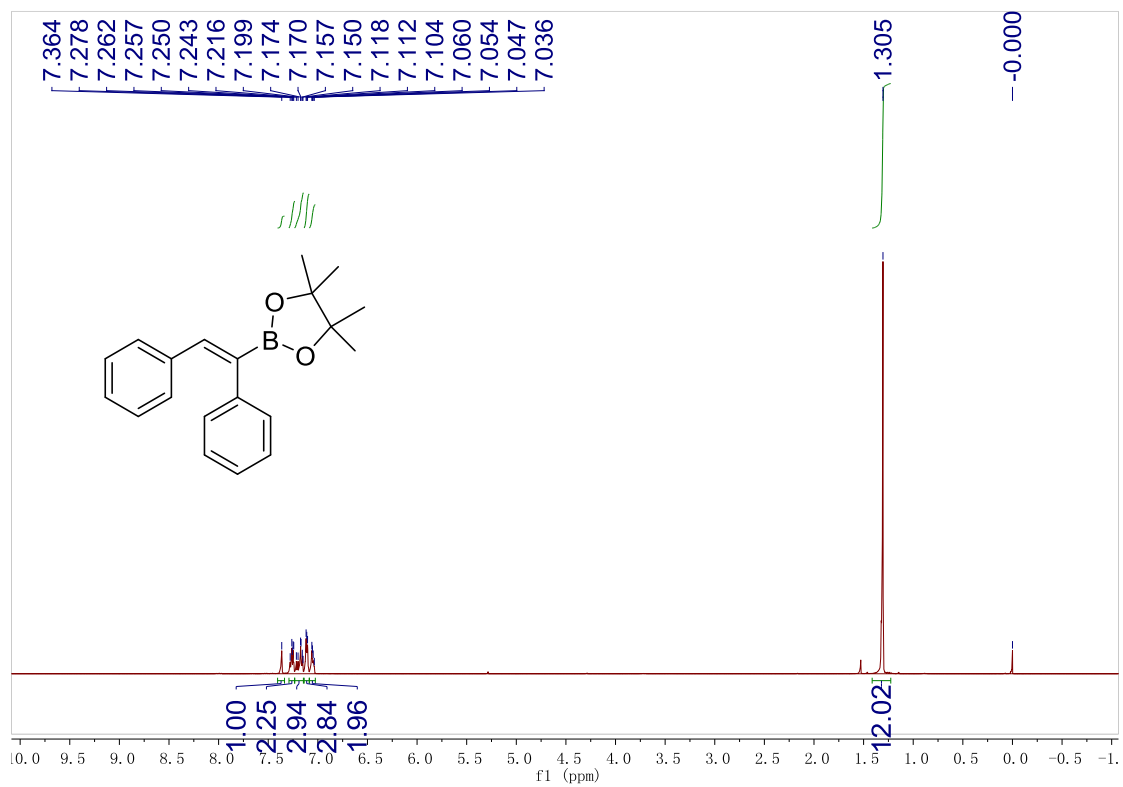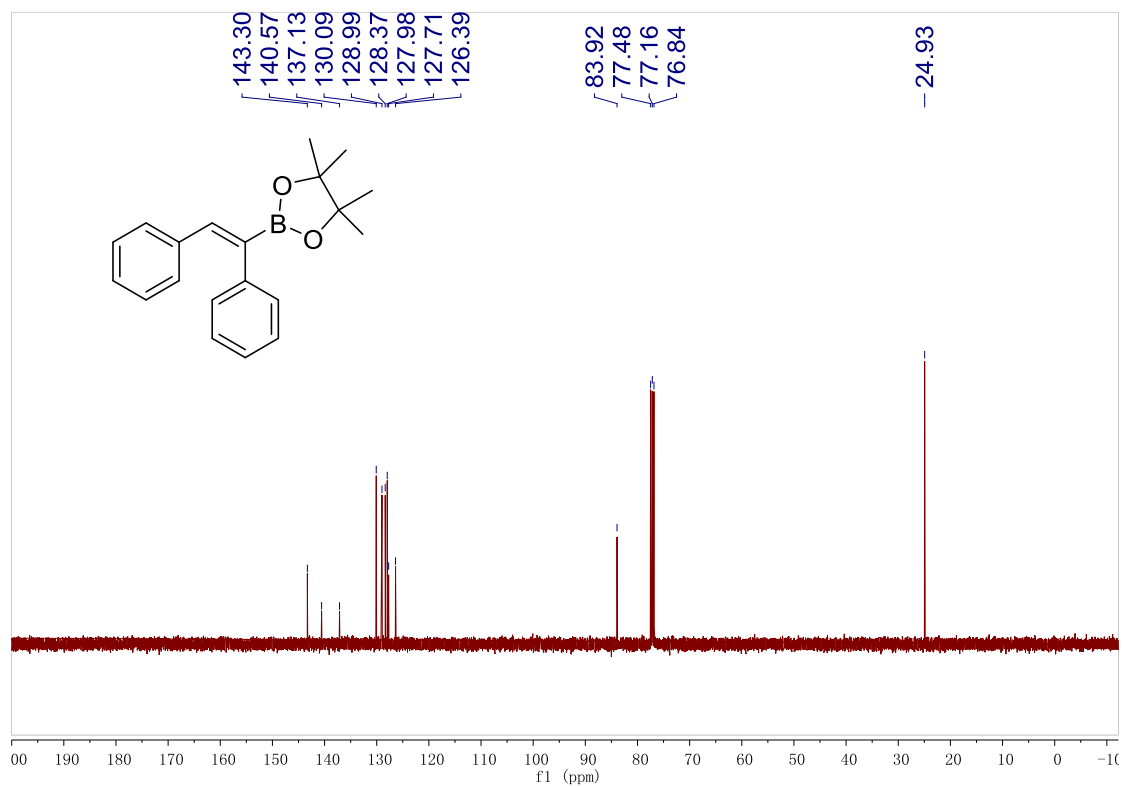

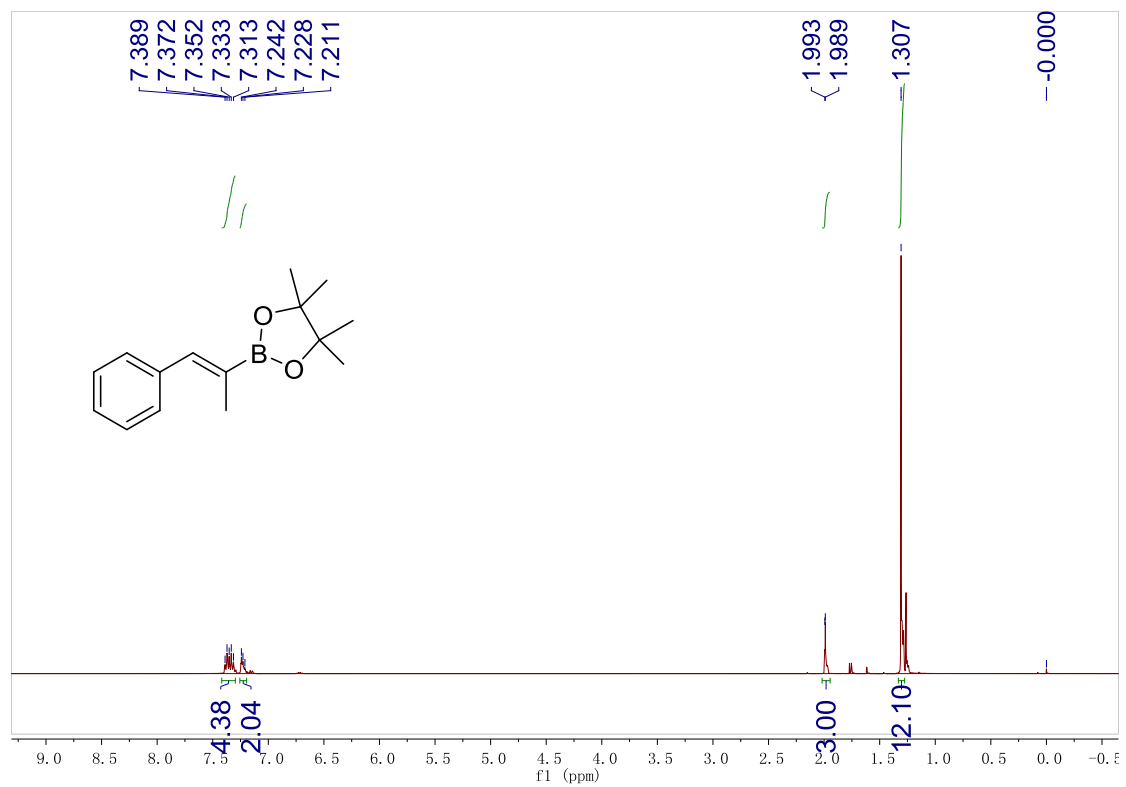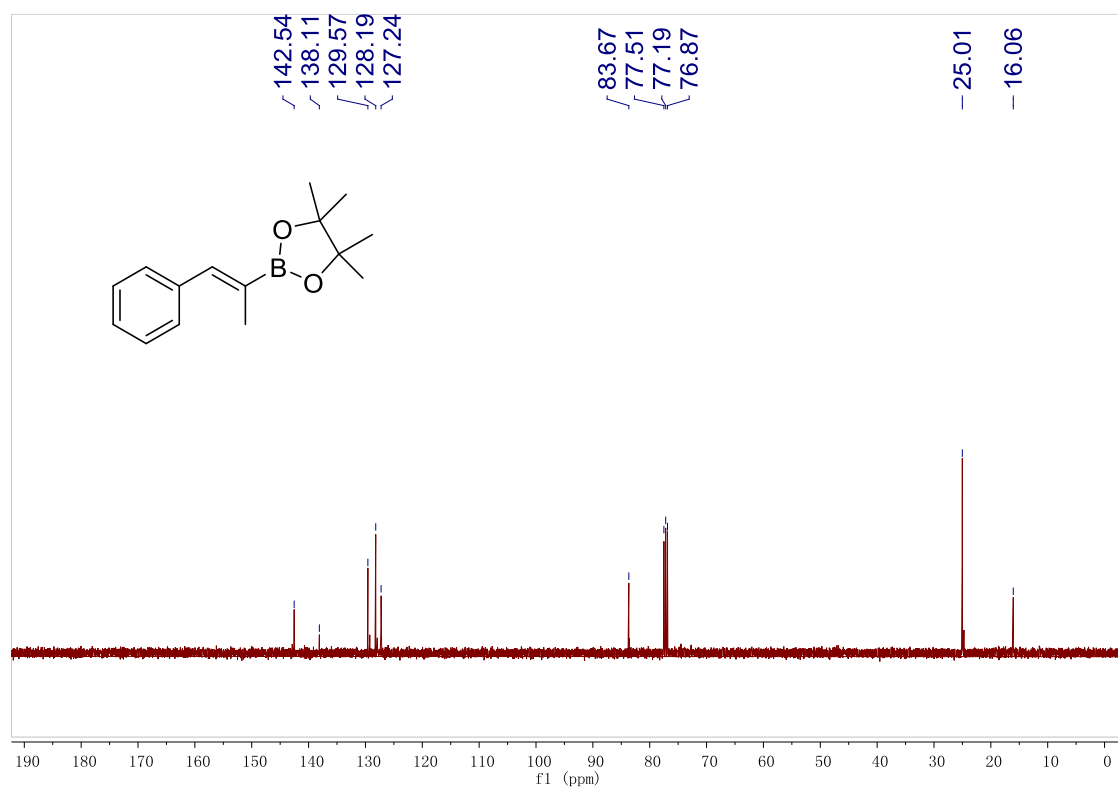

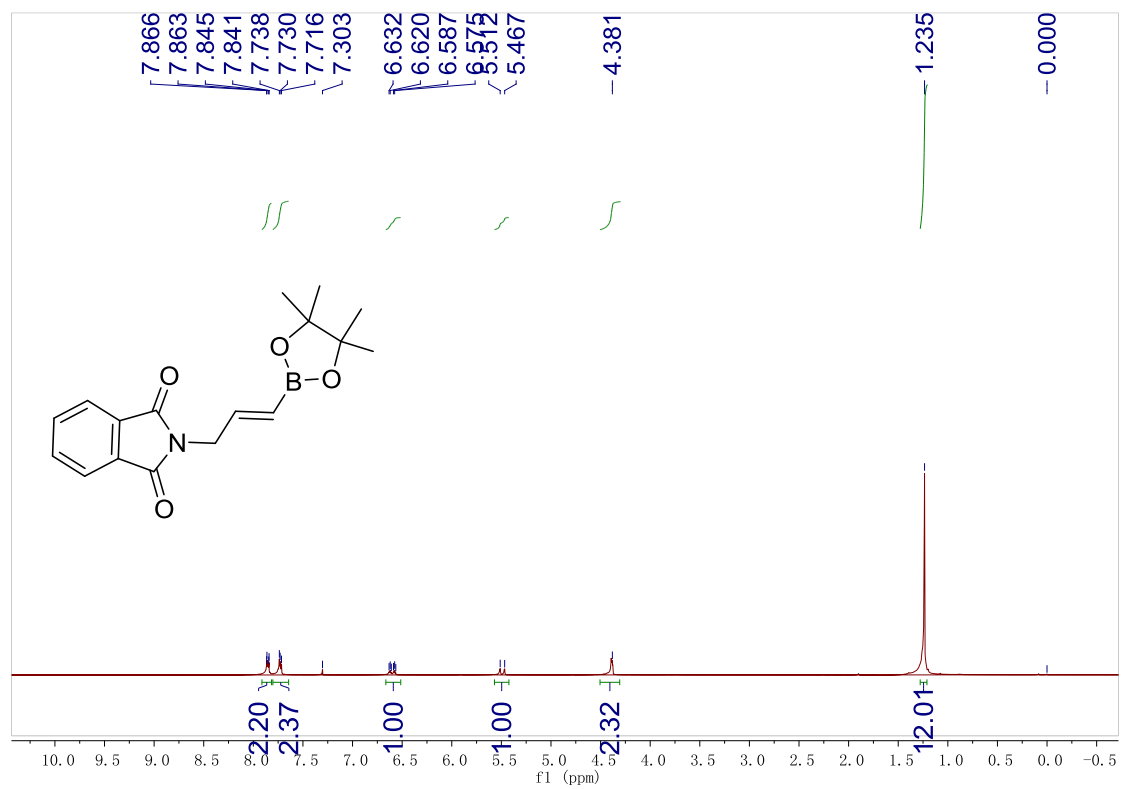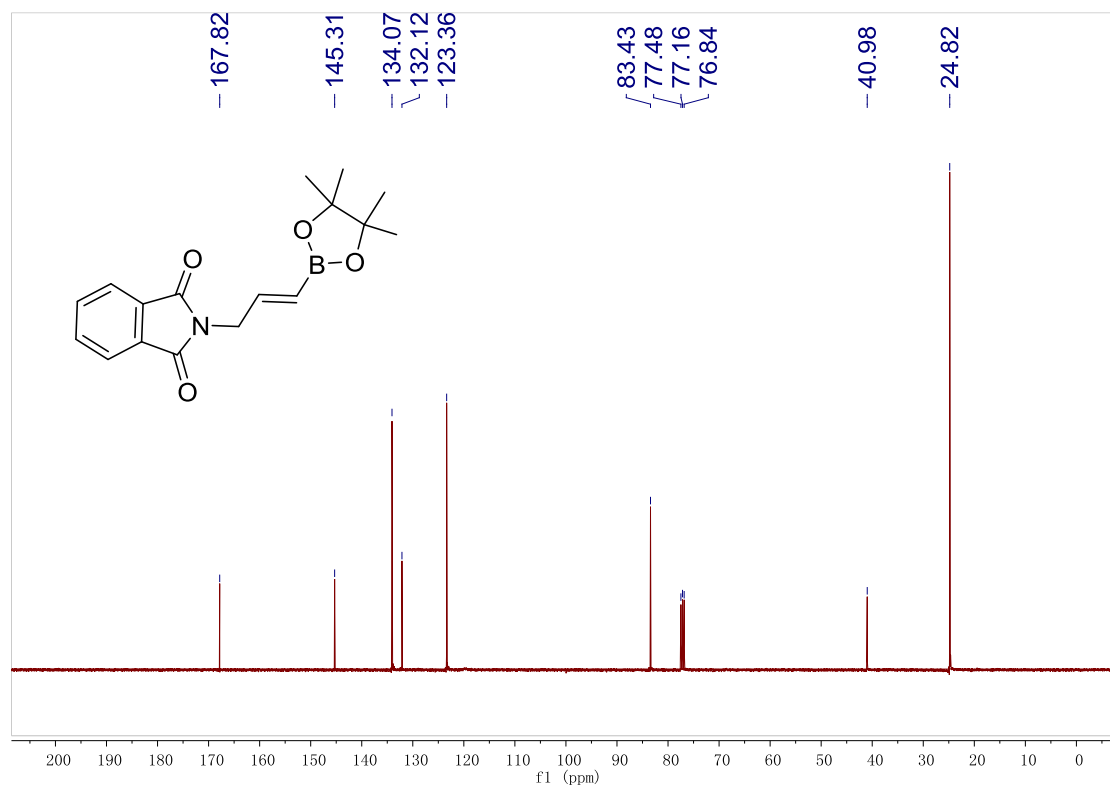



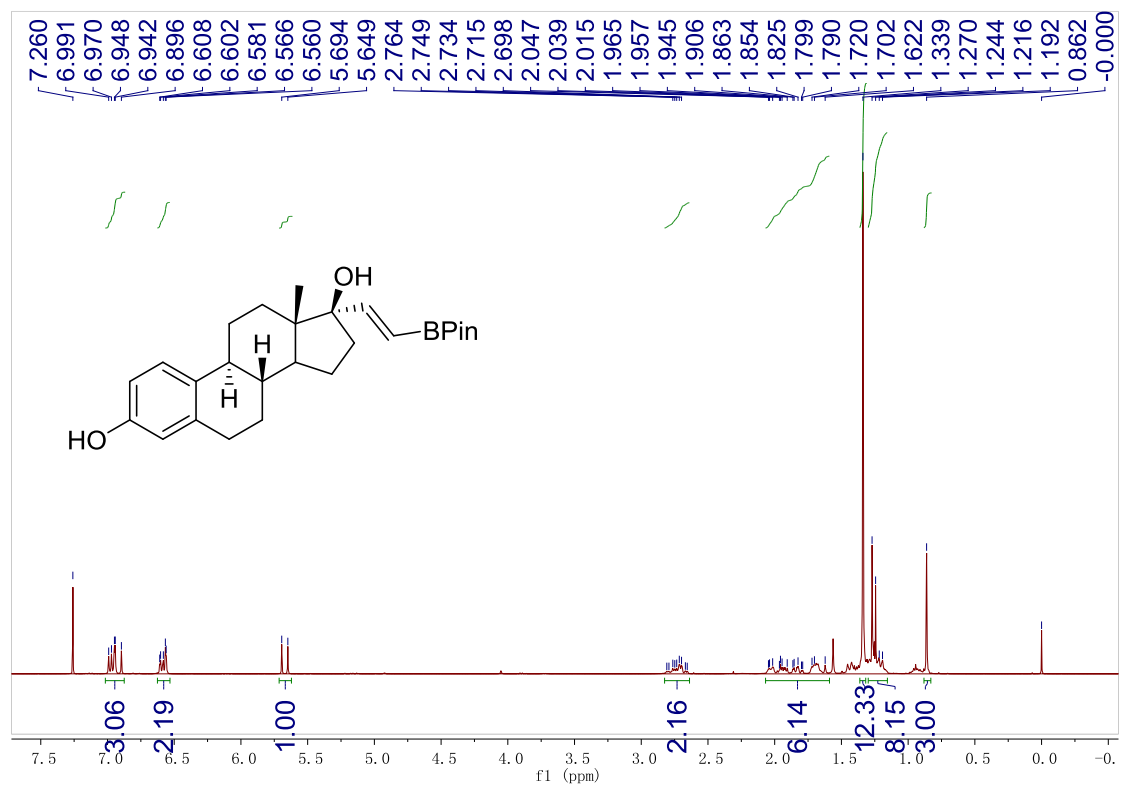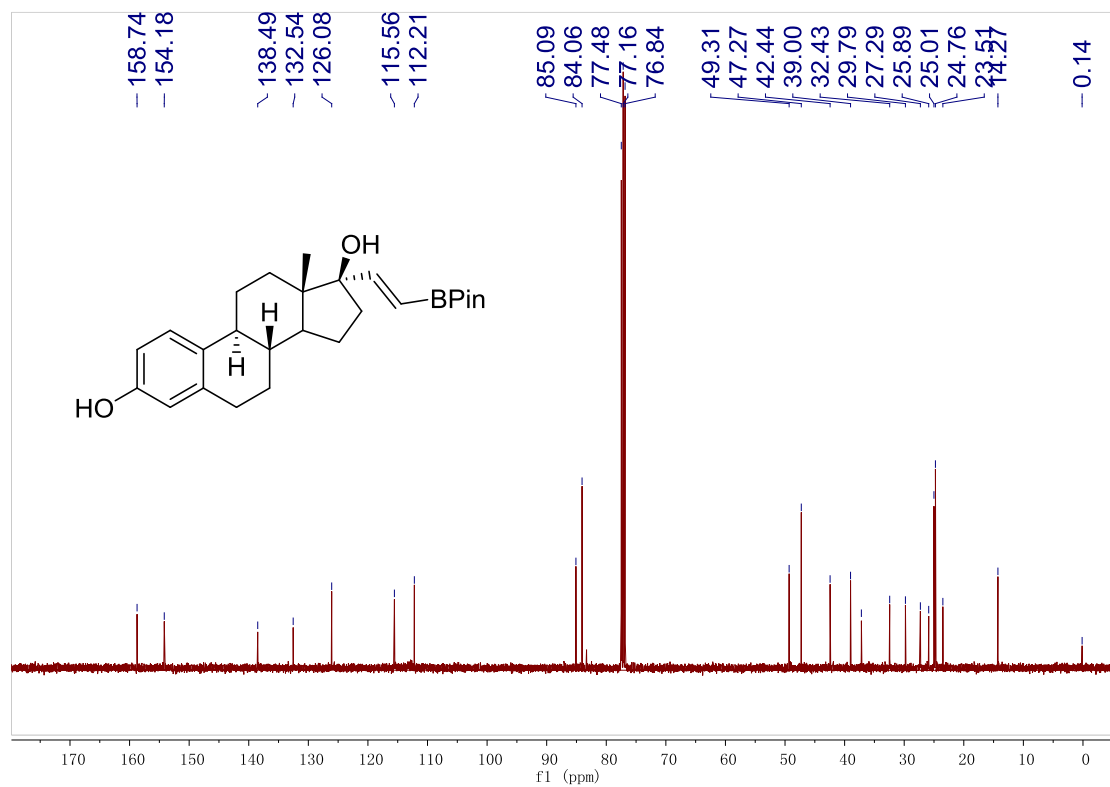

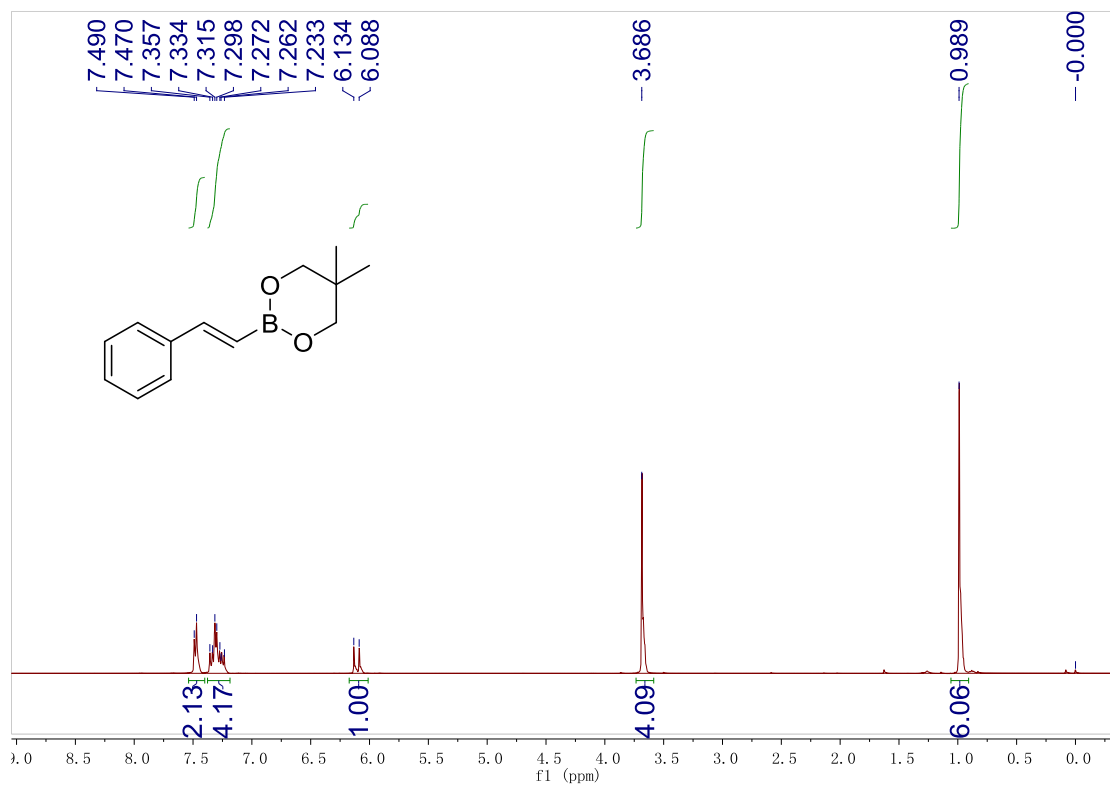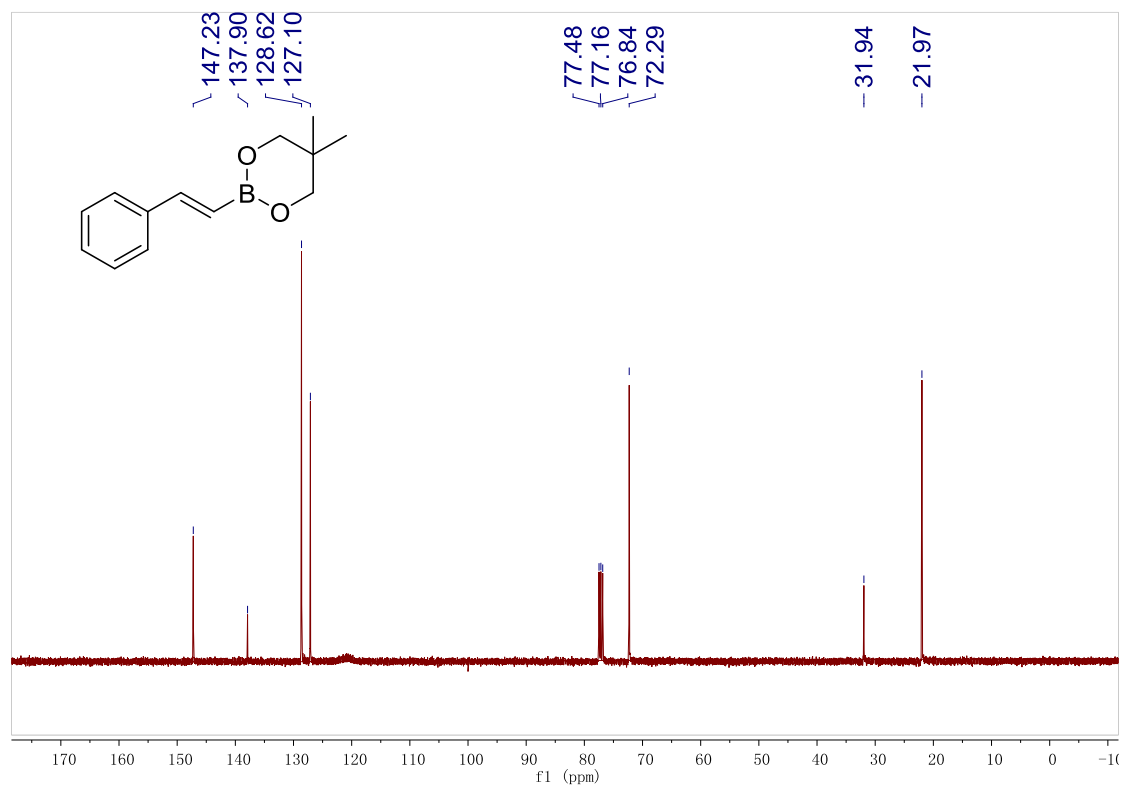

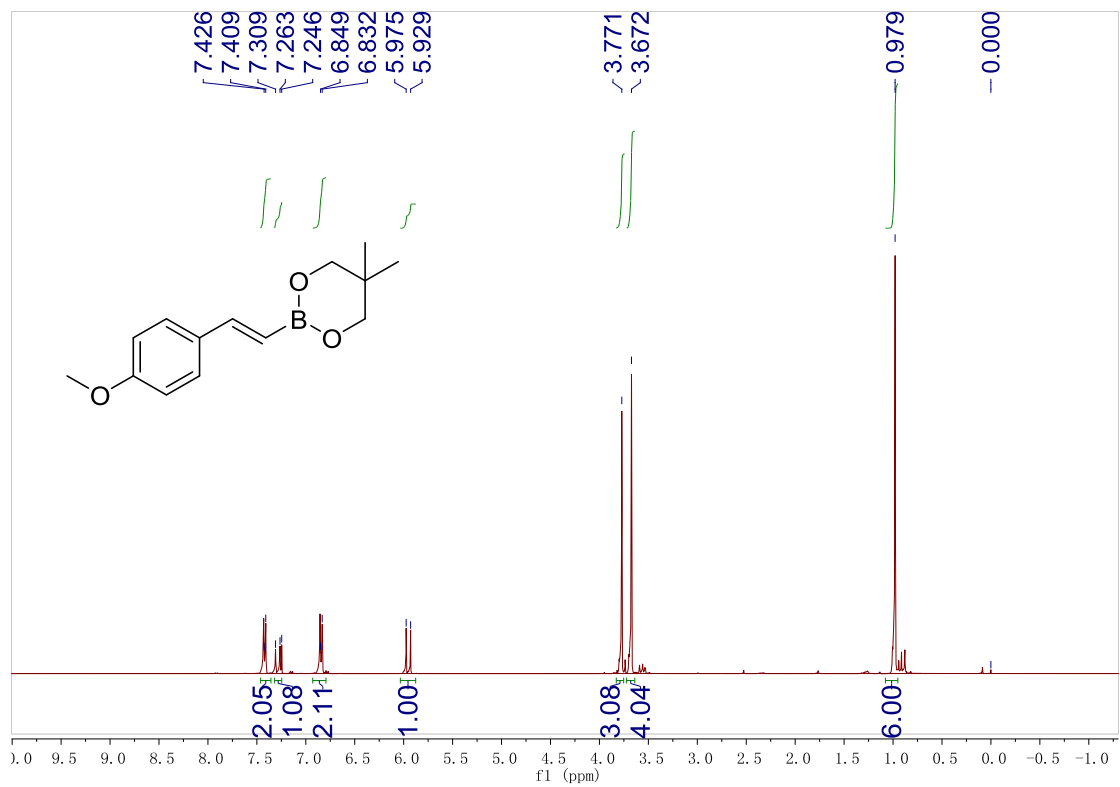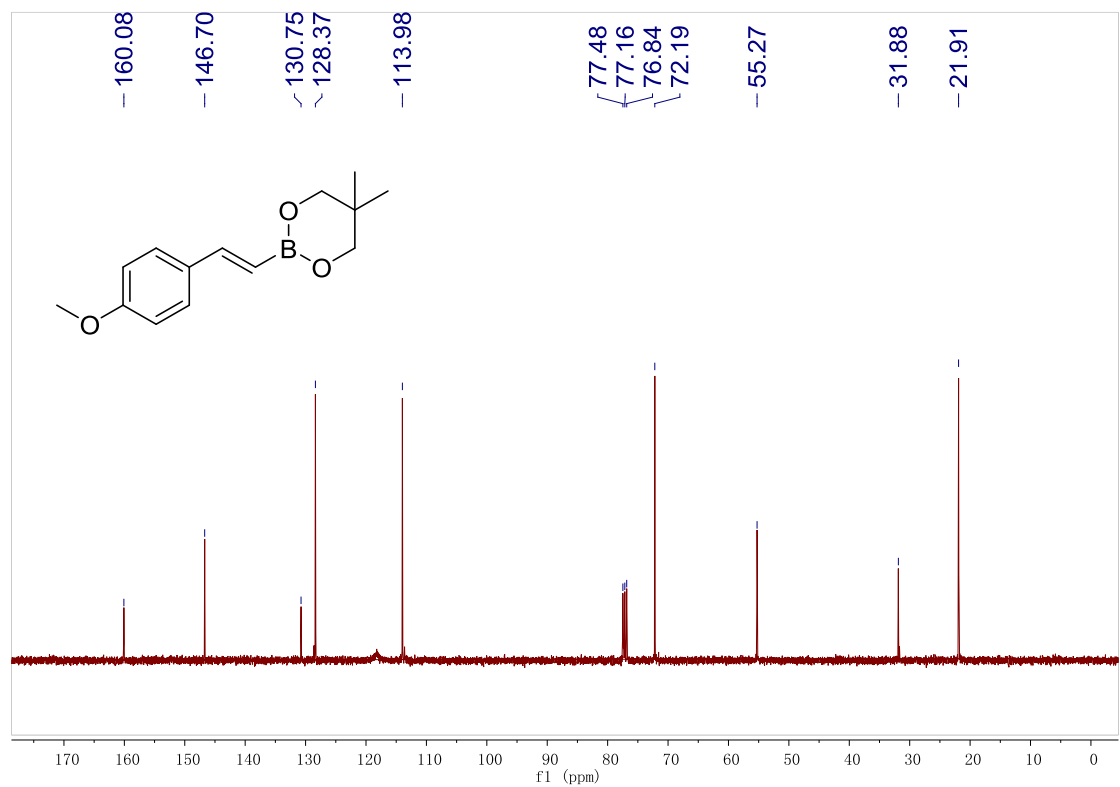

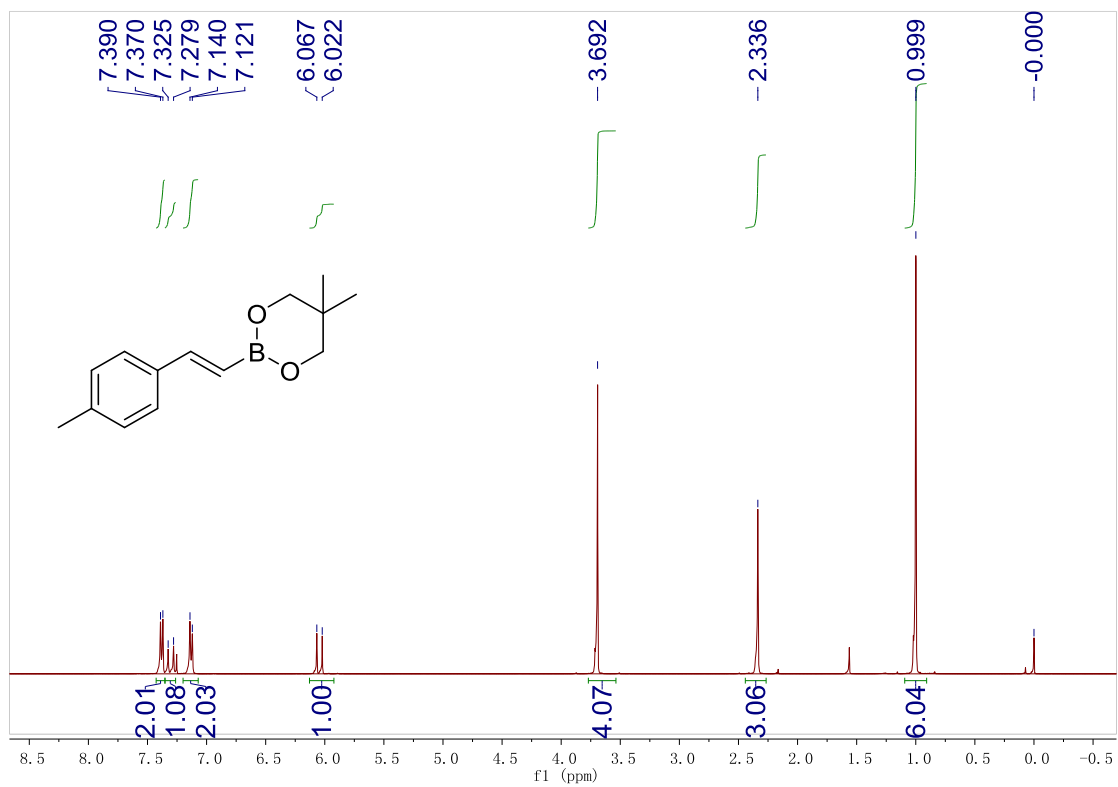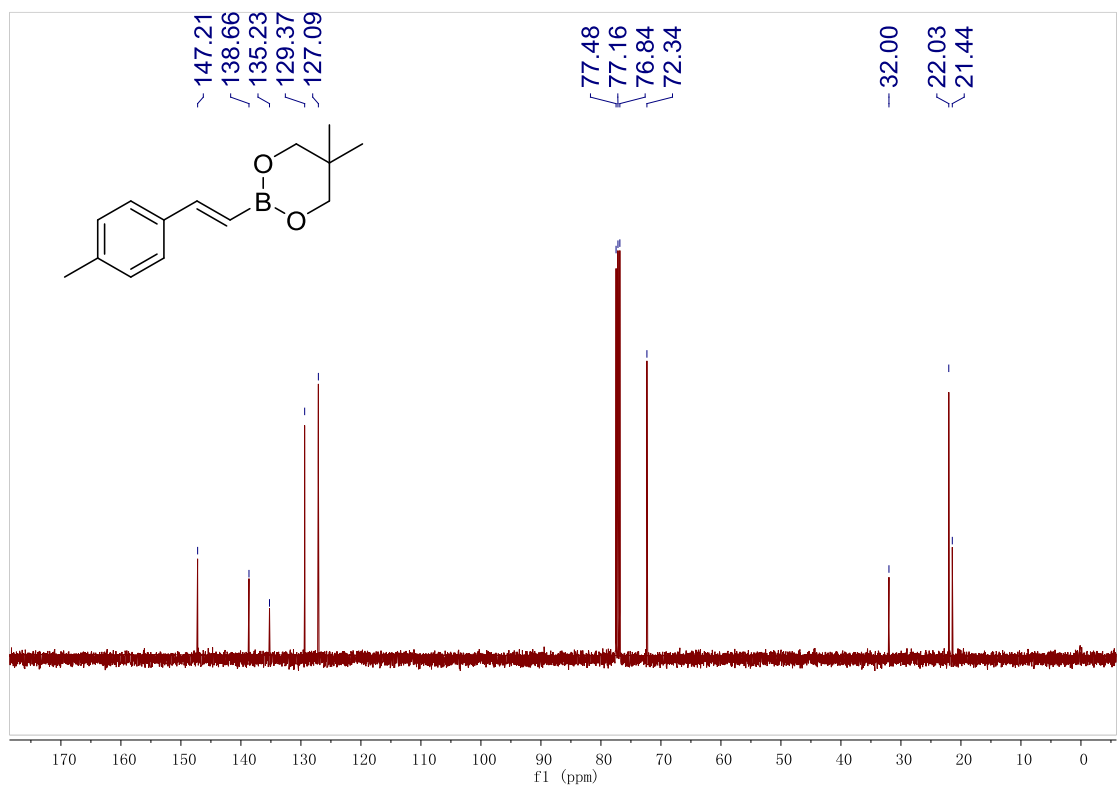

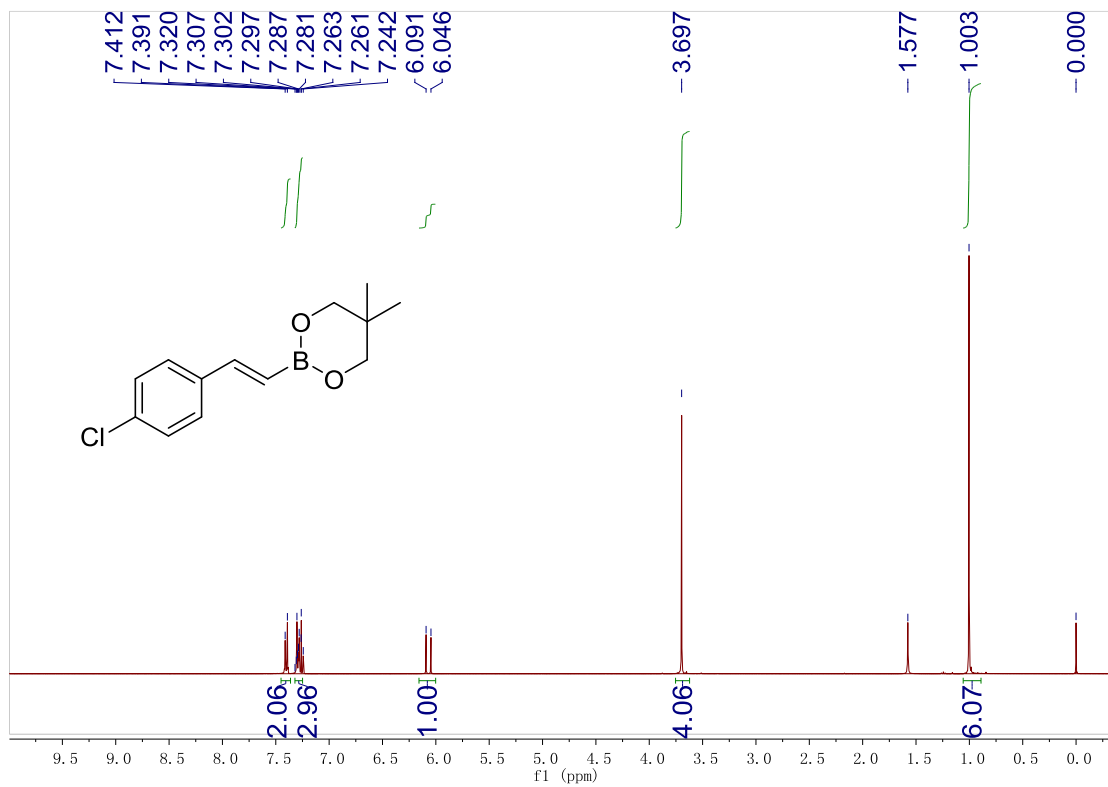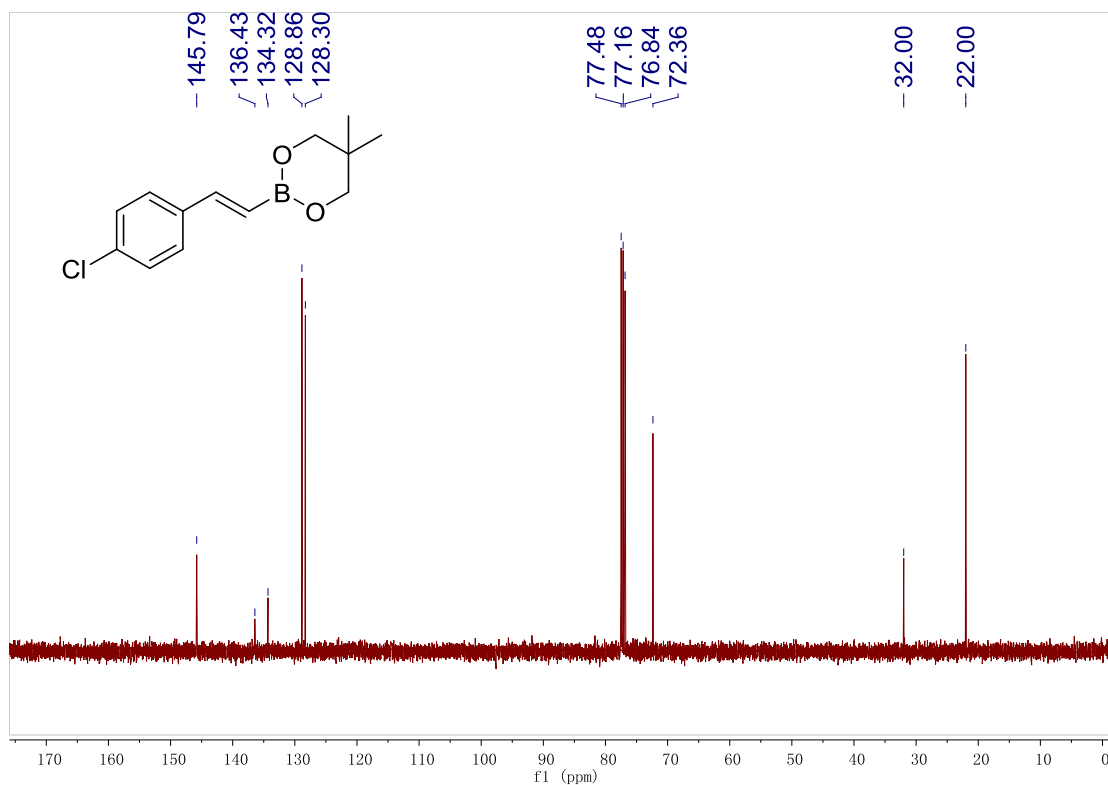

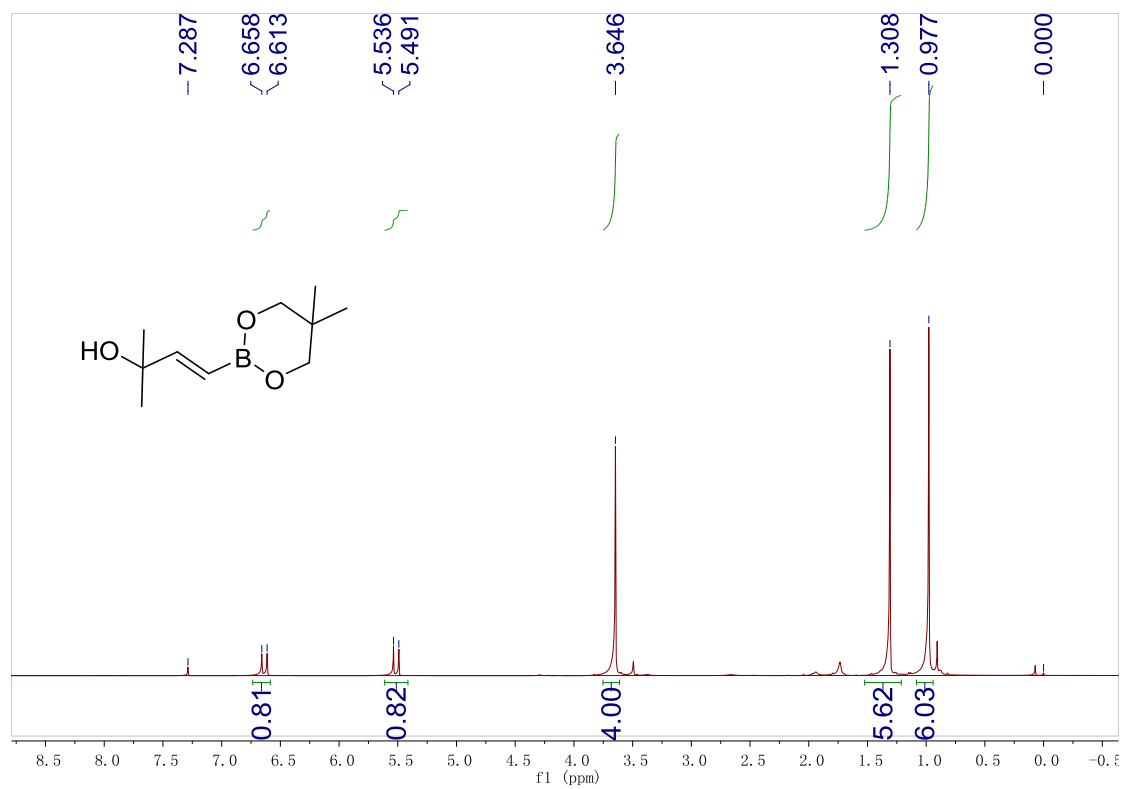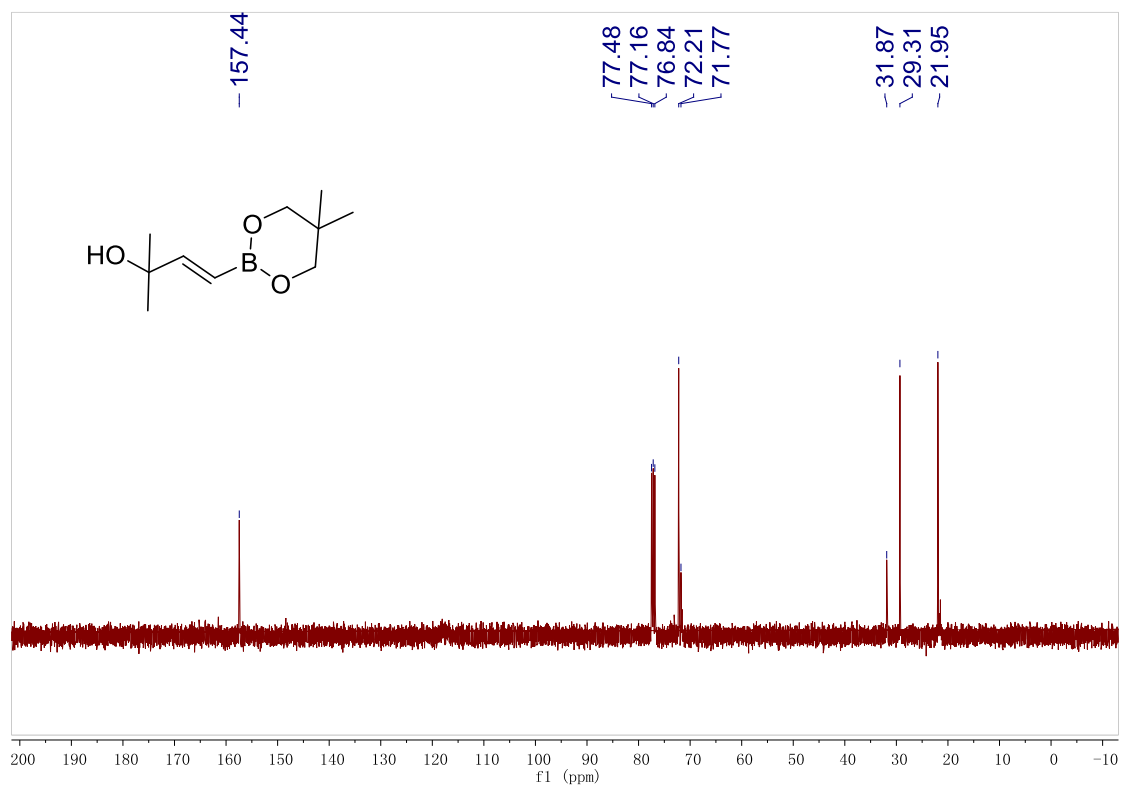

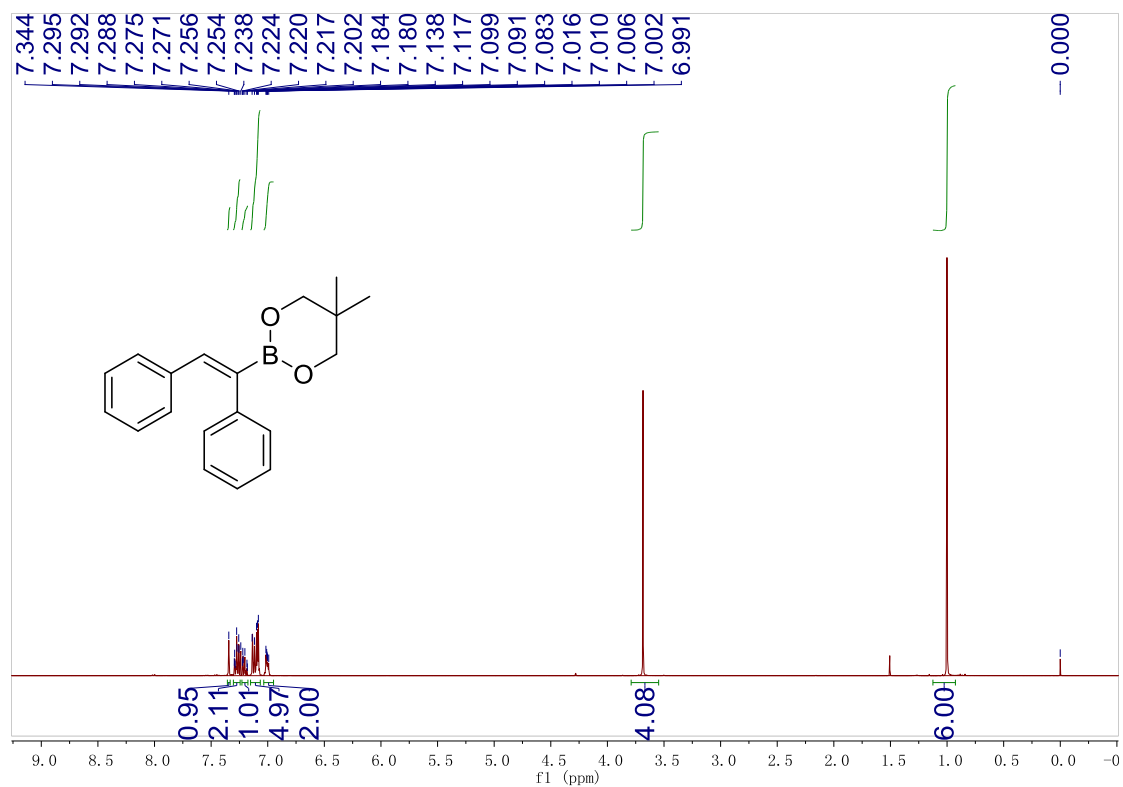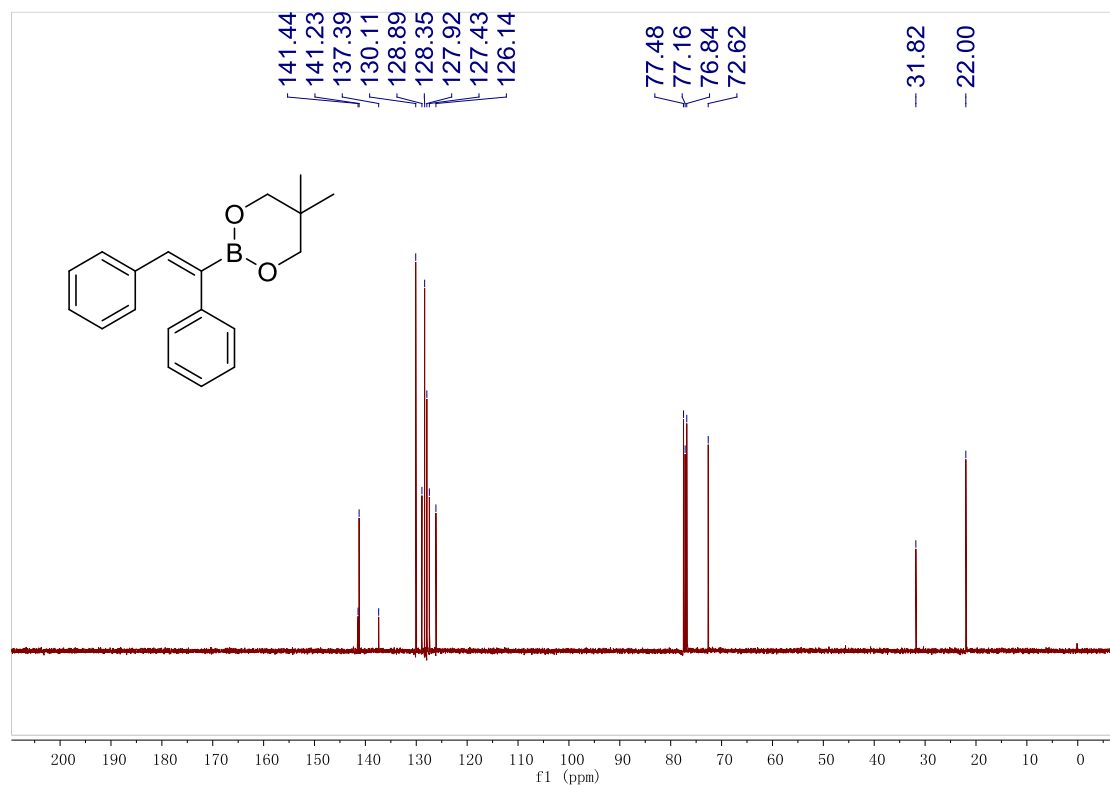

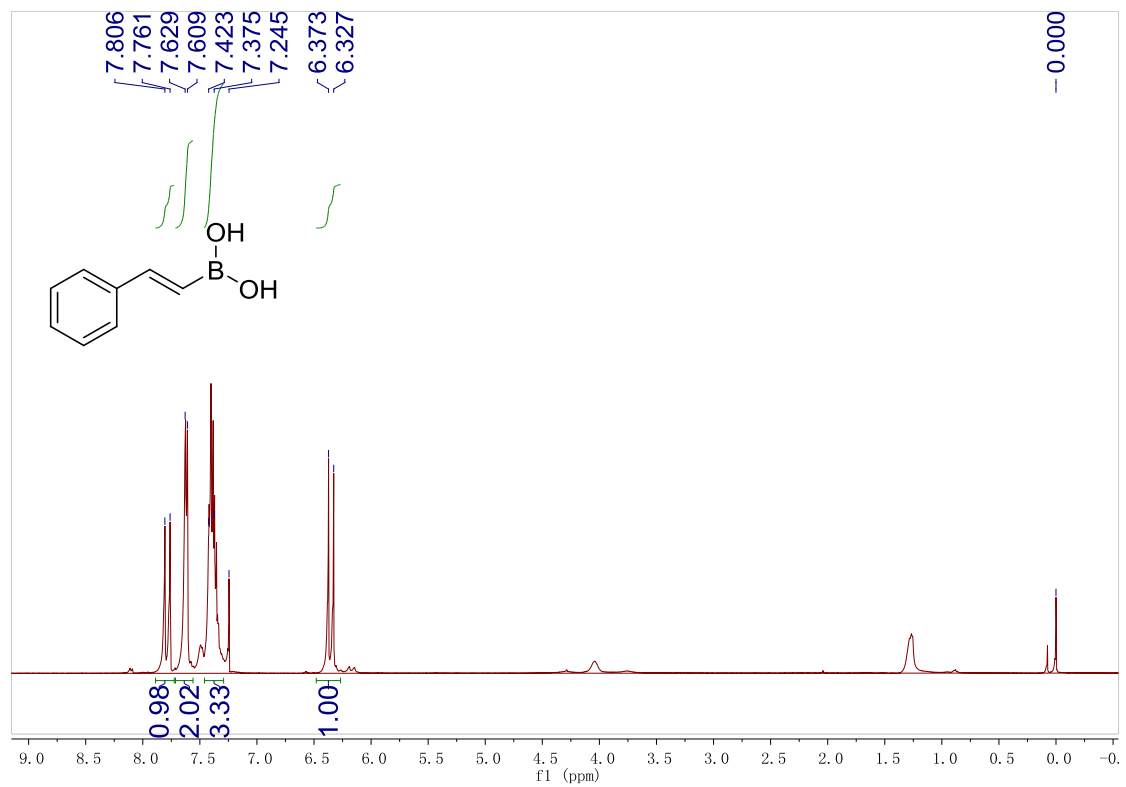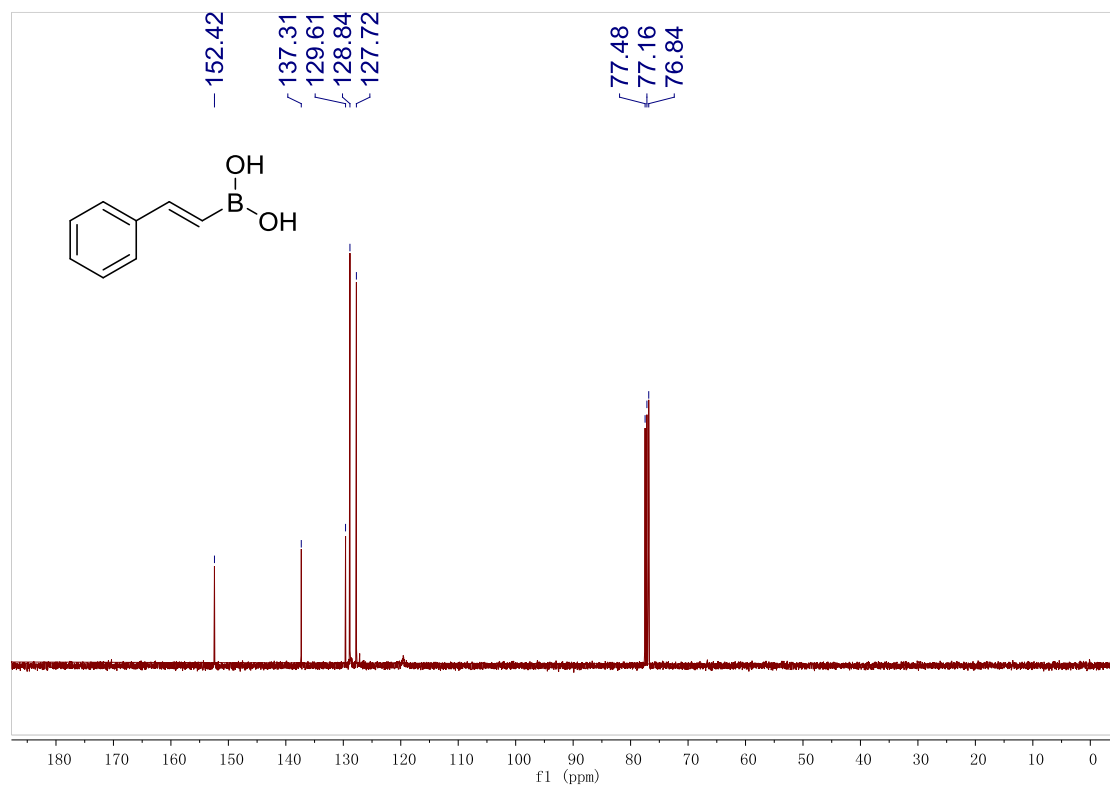



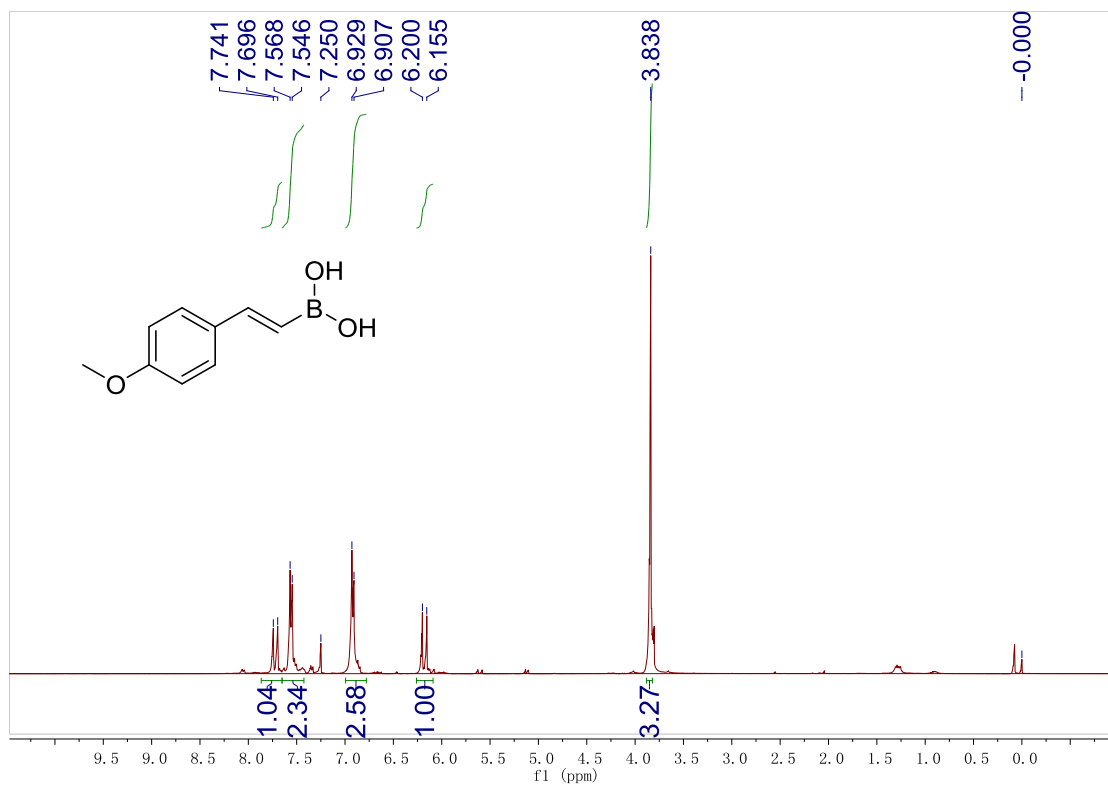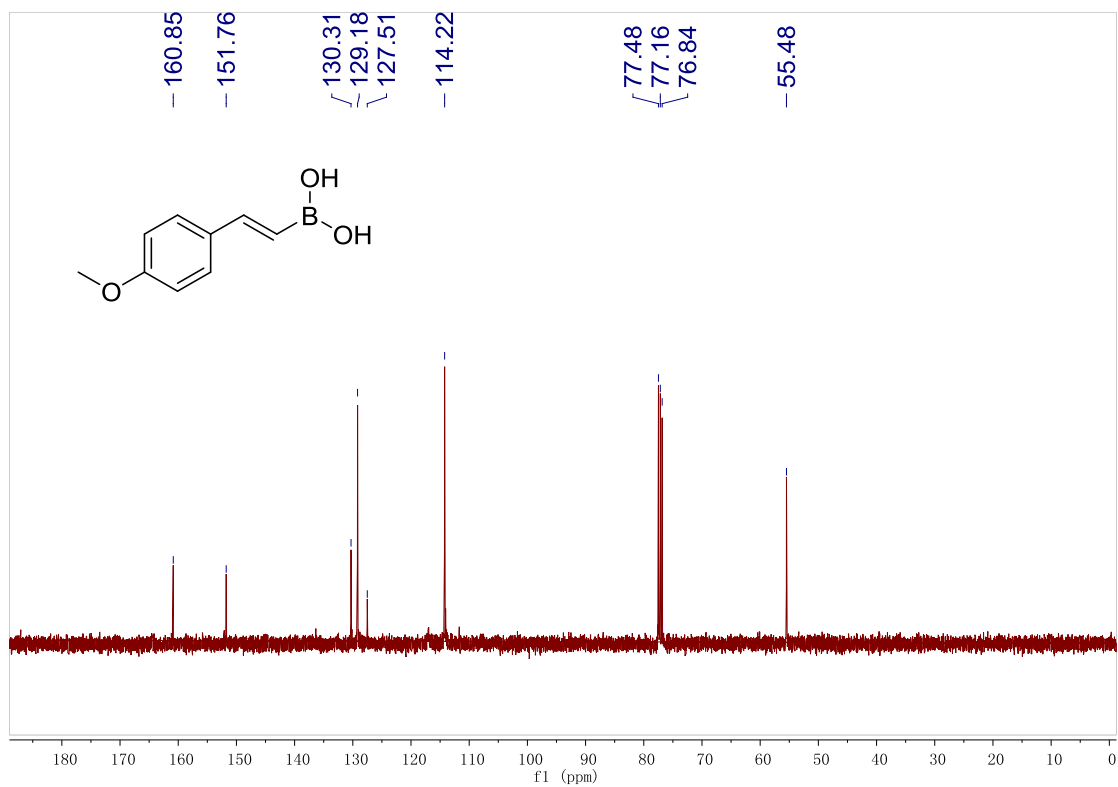

Supplement: d2ob02130g1.pdf [file d2ob02130g1.pdf]
